# Supplementary material for: Importance of isomerization reactions for OH radical regeneration from the photo-oxidation of isoprene investigated in the atmospheric simulation chamber SAPHIR
Source: Copernicus journal article supplement (doi:10.5194/acp-20-3333-2020), 2020-03-20
Supplement: Supplementary file 1 [file acp-20-3333-2020-supplement.zip]

Archive with 3 entries (3 files):
- acp-20-3333-2020-supplement-title-page.pdf
- acp-2019-794_SI.pdf
- acp-2019-794_Theoretical_data.txt
