# Supplementary material for: Importance of isomerization reactions for OH radical regeneration from the photo-oxidation of isoprene investigated in the atmospheric simulation chamber SAPHIR
Source: Copernicus journal article supplement (doi:10.5194/acp-20-3333-2020), 2020-03-20
Supplement: Supplementary file 1 [file acp-20-3333-2020-supplement.zip › acp-20-3333-2020-supplement-title-page.pdf]

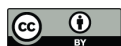

## *Supplement of*

# **Importance of isomerization reactions for OH radical regeneration from the photo-oxidation of isoprene investigated in the atmospheric simulation chamber SAPHIR**

**Anna Novelli et al.**

*Correspondence to:* Anna Novelli (a.novelli@fz-juelich.de)

- [acp-20-3333-2020-supplement-title-page.pdf](#)
- [acp-2019-794\\_SI.pdf](#)
- [acp-2019-794\\_Theoretical\\_data.txt](#)

The copyright of individual parts of the supplement might differ from the CC BY 4.0 License.
