# Supplementary material for: Importance of isomerization reactions for OH radical regeneration from the photo-oxidation of isoprene investigated in the atmospheric simulation chamber SAPHIR
Source: Copernicus journal article supplement (doi:10.5194/acp-20-3333-2020), 2020-03-20
Supplement: Supplementary file 1 [file acp-20-3333-2020-supplement.zip › acp-2019-794_Theoretical_data.txt]

#################################################################################
E-HOCH=CHCH2CH2OO ring closure
#################################################################################

HOCHCHCH2CH2OO.Ecpmc
~~~~~~~~~~~~~~~~~~~~
E(UM062X/Aug-CC-pVTZ) (Hartree): -382.13875016 
Electronic state : 2-A
Cartesian coordinates (Angs):
     C      -1.464605     -0.422977       0.119382
     C      -1.214437      0.847892      -0.164136
     C       0.132747      1.506700      -0.092726
     C       1.242428      0.655855       0.476854
     O       1.542377     -0.394003      -0.472187
     O       2.422013     -1.221736      -0.000305
     O      -2.679471     -1.027466       0.067432
     H      -0.700741     -1.127820       0.419328
     H      -2.038291      1.479660      -0.483204
     H       0.436862      1.853511      -1.084376
     H       0.067173      2.402931       0.529284
     H       2.158746      1.227493       0.615094
     H       0.967614      0.177698       1.416724
     H      -3.347513     -0.392658      -0.208613
Rotational constants (GHz):    4.5202800    1.4779300    1.1717900
Vibrational harmonic frequencies (cm-1):
       48.1026                  124.2428                  131.8012            
      214.6629                  263.0421                  302.0468            
      395.1256                  448.3625                  524.2222            
      619.2420                  798.5684                  872.2430            
      939.1204                  992.9402                 1001.4340            
     1064.1514                 1112.3987                 1161.7700            
     1229.2525                 1254.3525                 1293.3706            
     1297.0187                 1350.5167                 1387.6863            
     1403.8246                 1421.8062                 1476.3599            
     1506.1178                 1767.7863                 3052.5511            
     3078.7936                 3092.3963                 3144.1966            
     3156.9067                 3222.3314                 3857.5254            
Zero-point correction (Hartree): 0.111644

HOCHCHCH2CH2OO.Ecpmt
~~~~~~~~~~~~~~~~~~~~
E(UM062X/Aug-CC-pVTZ) (Hartree): -382.13755268 
Electronic state : 2-A
Cartesian coordinates (Angs):
     C      -1.459720     -0.380138       0.100018
     C      -1.195673      0.890109      -0.161260
     C       0.160351      1.527147      -0.087119
     C       1.259783      0.656818       0.472133
     O       1.538632     -0.395509      -0.482336
     O       2.331305     -1.292747       0.015563
     O      -2.730887     -0.869703       0.027081
     H      -0.695940     -1.096969       0.379060
     H      -2.021999      1.524596      -0.459245
     H       0.465324      1.880214      -1.076448
     H       0.109175      2.419006       0.542606
     H       2.186733      1.212246       0.607498
     H       0.982718      0.178054       1.410801
     H      -2.726850     -1.817098       0.170634
Rotational constants (GHz):    4.4196600    1.5059900    1.1816000
Vibrational harmonic frequencies (cm-1):
       42.0257                  126.7007                  135.7249            
      206.3338                  235.5286                  286.2958            
      312.5589                  394.5795                  519.4377            
      621.7216                  802.1858                  879.4116            
      933.8539                  972.8706                  994.0134            
     1062.5462                 1111.2065                 1185.9560            
     1215.4124                 1235.8830                 1286.2828            
     1299.1804                 1353.5418                 1387.9902            
     1389.6808                 1417.4445                 1475.1009            
     1504.8745                 1790.0874                 3052.1121            
     3078.1940                 3091.5871                 3143.5744            
     3188.7776                 3190.6990                 3917.2498            
Zero-point correction (Hartree): 0.111267

HOCHCHCH2CH2OO.Ecppc
~~~~~~~~~~~~~~~~~~~~
E(UM062X/Aug-CC-pVTZ) (Hartree): -382.13947030 
Electronic state : 2-A
Cartesian coordinates (Angs):
     C      -1.529484     -0.302489       0.170987
     C      -1.034845      0.811980      -0.349991
     C       0.374698      1.300939      -0.188853
     C       1.232616      0.510313       0.773581
     O       1.481866     -0.830752       0.290517
     O       2.258116     -0.821903      -0.748450
     O      -2.804690     -0.750430       0.033491
     H      -0.945277     -0.991818       0.765712
     H      -1.686990      1.431986      -0.958476
     H       0.886349      1.319515      -1.154593
     H       0.364612      2.334302       0.167739
     H       2.203798      0.980548       0.914588
     H       0.745164      0.362278       1.736279
     H      -3.307907     -0.136598      -0.510058
Rotational constants (GHz):    4.9983100    1.4387300    1.2663800
Vibrational harmonic frequencies (cm-1):
       67.8308                  117.8662                  148.3515            
      204.1084                  269.3890                  314.1250            
      431.1025                  446.1421                  535.4174            
      625.5700                  811.4498                  862.5680            
      928.0912                  984.7397                  995.4913            
     1037.2588                 1118.6221                 1160.2299            
     1227.7424                 1248.8181                 1283.3823            
     1316.4783                 1350.1384                 1390.1106            
     1399.1873                 1413.6909                 1474.9318            
     1494.2587                 1766.1610                 3055.8556            
     3083.2992                 3099.4234                 3154.0351            
     3155.0453                 3223.1537                 3859.8894            
Zero-point correction (Hartree): 0.111753

HOCHCHCH2CH2OO.Ecppt
~~~~~~~~~~~~~~~~~~~~
E(UM062X/Aug-CC-pVTZ) (Hartree): -382.13802000 
Electronic state : 2-A
Cartesian coordinates (Angs):
     C      -1.529449     -0.270471       0.138609
     C      -1.022385      0.847727      -0.355323
     C       0.393919      1.310374      -0.189437
     C       1.239116      0.507328       0.773733
     O       1.461834     -0.842237       0.299354
     O       2.237854     -0.857438      -0.739800
     O      -2.840301     -0.599535      -0.051762
     H      -0.944052     -0.982245       0.709316
     H      -1.680273      1.480772      -0.939231
     H       0.906484      1.324864      -1.154913
     H       0.399687      2.343160       0.169092
     H       2.219956      0.958170       0.911539
     H       0.749641      0.373436       1.737641
     H      -3.013743     -1.474224       0.298727
Rotational constants (GHz):    4.9691000    1.4437000    1.2654800
Vibrational harmonic frequencies (cm-1):
       67.3447                  120.3136                  150.1679            
      197.9145                  232.0141                  293.8005            
      317.3200                  440.0979                  534.0222            
      625.9645                  814.0036                  865.5497            
      925.5620                  971.6286                  985.4511            
     1035.0411                 1118.1520                 1185.3130            
     1218.1745                 1229.5988                 1278.3390            
     1313.1957                 1355.4120                 1387.3704            
     1392.6868                 1407.0145                 1473.1566            
     1491.9981                 1788.7664                 3055.7378            
     3082.3562                 3098.1625                 3153.7357            
     3187.0484                 3189.4940                 3917.0116            
Zero-point correction (Hartree): 0.111400

HOCHCHCH2CH2OO.Ectpc
~~~~~~~~~~~~~~~~~~~~
E(UM062X/Aug-CC-pVTZ) (Hartree): -382.13938546 
Electronic state : 2-A
Cartesian coordinates (Angs):
     C       1.936312     -0.344147      -0.048058
     C       1.221437      0.766858       0.066513
     C      -0.268783      0.828034       0.220496
     C      -0.935101     -0.530449       0.227231
     O      -2.358621     -0.381508       0.409864
     O      -2.926371      0.085049      -0.659898
     O       3.285433     -0.418540      -0.190501
     H       1.502893     -1.335730      -0.039989
     H       1.740157      1.720866       0.048268
     H      -0.526798      1.344957       1.148427
     H      -0.706390      1.411545      -0.592537
     H      -0.780617     -1.069171      -0.707047
     H      -0.617071     -1.141356       1.070902
     H       3.661109      0.467113      -0.200841
Rotational constants (GHz):    9.8150100    0.9944200    0.9536900
Vibrational harmonic frequencies (cm-1):
       69.9008                  110.5973                  147.6182            
      162.2996                  271.1103                  322.2673            
      376.4266                  438.7931                  543.6010            
      669.5200                  774.6993                  854.3725            
      955.3967                  987.5271                  994.7808            
     1101.3430                 1108.4992                 1158.9623            
     1238.2333                 1253.1820                 1285.9201            
     1320.6570                 1340.1831                 1350.9176            
     1403.4472                 1422.6524                 1492.0627            
     1503.2176                 1766.7069                 3055.1602            
     3089.3721                 3090.7007                 3150.9597            
     3159.3541                 3214.6008                 3858.0659            
Zero-point correction (Hartree): 0.111728

HOCHCHCH2CH2OO.Ectpt
~~~~~~~~~~~~~~~~~~~~
E(UM062X/Aug-CC-pVTZ) (Hartree): -382.13741398 
Electronic state : 2-A
Cartesian coordinates (Angs):
     C       1.939941     -0.306288      -0.043998
     C       1.212318      0.795109       0.054537
     C      -0.277420      0.841180       0.204218
     C      -0.931955     -0.522116       0.240755
     O      -2.357334     -0.384119       0.418383
     O      -2.929968      0.042776      -0.665264
     O       3.297206     -0.251505      -0.178406
     H       1.511880     -1.302568      -0.024448
     H       1.733897      1.744451       0.023800
     H      -0.541629      1.377099       1.119589
     H      -0.719151      1.403362      -0.621714
     H      -0.772293     -1.080333      -0.681255
     H      -0.609342     -1.110884       1.098530
     H       3.660101     -1.135645      -0.245271
Rotational constants (GHz):    9.8556000    0.9914600    0.9518100
Vibrational harmonic frequencies (cm-1):
       68.2076                  106.6733                  144.7125            
      160.4354                  191.3743                  296.9736            
      323.3690                  370.0179                  543.0483            
      668.8520                  773.9917                  862.0336            
      949.6565                  970.6268                  991.1841            
     1100.9311                 1106.9279                 1182.2731            
     1219.8489                 1238.4636                 1285.5997            
     1318.8167                 1339.1135                 1355.0051            
     1384.0531                 1421.4667                 1490.5967            
     1501.8193                 1787.9223                 3055.0370            
     3087.8865                 3089.4569                 3148.9799            
     3179.5770                 3191.1718                 3919.9732            
Zero-point correction (Hartree): 0.111234

HOCHCHCH2CH2OO.Ecttc
~~~~~~~~~~~~~~~~~~~~
E(UM062X/Aug-CC-pVTZ) (Hartree): -382.13876938 
Point group : CS
Electronic state : 2-A"
Cartesian coordinates (Angs):
     C      -0.771975     -1.802408       0.000000
     C       0.515982     -1.485695       0.000000
     C       1.065624     -0.090714       0.000000
     C      -0.000000      0.979201       0.000000
     O       0.681606      2.250581       0.000000
     O      -0.157836      3.238907       0.000000
     O      -1.288633     -3.057915       0.000000
     H      -1.565508     -1.066926       0.000000
     H       1.246994     -2.288398       0.000000
     H       1.705699      0.056392       0.873368
     H       1.705699      0.056392      -0.873368
     H      -0.628043      0.945712      -0.890070
     H      -0.628043      0.945712       0.890070
     H      -0.575674     -3.703771       0.000000
Rotational constants (GHz):    9.0291200    0.9776300    0.8918700
Vibrational harmonic frequencies (cm-1):
       73.9734 (  A")           103.8979 (  A")           122.8267 (  A')     
      131.4241 (  A")           268.2891 (  A")           288.7826 (  A')     
      369.1405 (  A')           428.2408 (  A")           526.8094 (  A')     
      646.7481 (  A')           765.5339 (  A")           849.9082 (  A")     
      979.3574 (  A')           985.2831 (  A")          1031.1827 (  A')     
     1082.6697 (  A")          1125.1460 (  A')          1161.8411 (  A')     
     1227.6135 (  A")          1258.5921 (  A')          1296.4638 (  A')     
     1307.5496 (  A")          1331.8992 (  A')          1351.7050 (  A')     
     1404.0158 (  A')          1431.0892 (  A')          1498.7546 (  A')     
     1512.6102 (  A')          1765.5679 (  A')          3055.2827 (  A')     
     3083.1958 (  A')          3084.1565 (  A")          3140.6048 (  A")     
     3162.7702 (  A')          3218.6361 (  A')          3860.5767 (  A')     
Zero-point correction (Hartree): 0.111476

HOCHCHCH2CH2OO.Ecttt
~~~~~~~~~~~~~~~~~~~~
E(UM062X/Aug-CC-pVTZ) (Hartree): -382.13700871 
Point group : CS
Electronic state : 2-A"
Cartesian coordinates (Angs):
     C      -0.730667     -1.816974       0.000000
     C       0.550123     -1.482173       0.000000
     C       1.078835     -0.080256       0.000000
     C      -0.000000      0.976032       0.000000
     O       0.661347      2.258959       0.000000
     O      -0.193057      3.234275       0.000000
     O      -1.122947     -3.123534       0.000000
     H      -1.532954     -1.087177       0.000000
     H       1.278914     -2.283852       0.000000
     H       1.717525      0.073764       0.873326
     H       1.717525      0.073764      -0.873326
     H      -0.627193      0.934602      -0.890543
     H      -0.627193      0.934602       0.890543
     H      -2.079119     -3.183081       0.000000
Rotational constants (GHz):    9.0451300    0.9756500    0.8903900
Vibrational harmonic frequencies (cm-1):
       78.1147 (  A")           105.6336 (  A")           123.3877 (  A')     
      141.6512 (  A")           214.4010 (  A")           288.1418 (  A')     
      304.9511 (  A")           364.9563 (  A')           524.9464 (  A')     
      646.4276 (  A')           765.6786 (  A")           858.0770 (  A")     
      969.0092 (  A")           971.9698 (  A')          1029.4277 (  A')     
     1082.5480 (  A")          1124.5327 (  A')          1184.5187 (  A')     
     1224.9998 (  A')          1228.0631 (  A")          1296.3103 (  A')     
     1306.9655 (  A")          1329.6117 (  A')          1356.7021 (  A')     
     1384.6632 (  A')          1429.1669 (  A')          1497.5473 (  A')     
     1511.9850 (  A')          1787.3630 (  A')          3054.9617 (  A')     
     3080.6423 (  A')          3083.6770 (  A")          3137.9846 (  A")     
     3181.5268 (  A')          3193.1579 (  A')          3919.4957 (  A')     
Zero-point correction (Hartree): 0.111136

HOCHCHCH2CH2OO.Egppc
~~~~~~~~~~~~~~~~~~~~
E(CCSD(T)/Aug-CC-pVTZ) (Hartree): -381.59741321 
E(CCSD/Aug-CC-pVTZ) (Hartree): -381.53562656 
     T1 diagnostic:  0.021635 
E(MP2/Aug-CC-pVTZ) (Hartree): -381.49135115 
E(MP3/Aug-CC-pVTZ) (Hartree): -381.52284012 
E(PMP2/Aug-CC-pVTZ) (Hartree): -381.49450832 
E(PMP3/Aug-CC-pVTZ) (Hartree): -381.52470252 
E(PUHF/Aug-CC-pVTZ) (Hartree): -380.13366994 
E(UHF/Aug-CC-pVTZ) (Hartree): -380.12852112 
E(UM062X/Aug-CC-pVTZ) (Hartree): -382.14077322 
Electronic state : 2-A
Cartesian coordinates (Angs):
     C       1.710511     -0.236631       0.326987
     C       0.944346      0.767676      -0.075868
     C      -0.364970      1.093381       0.572448
     C      -1.559565      0.810304      -0.322689
     O      -1.648835     -0.595790      -0.641420
     O      -1.913557     -1.302412       0.413399
     O       2.897580     -0.615656      -0.206873
     H       1.435802     -0.870144       1.161279
     H       1.254587      1.369726      -0.925861
     H      -0.486348      0.518270       1.490682
     H      -0.411223      2.150053       0.846885
     H      -2.497548      1.093650       0.152897
     H      -1.469744      1.294969      -1.293789
     H       3.111038     -0.054046      -0.958204
Rotational constants (GHz):    4.8942000    1.4051200    1.2198500
Vibrational harmonic frequencies (cm-1):
       48.4327                   73.9465                  138.6868            
      203.0000                  282.0698                  338.0806            
      432.5349                  464.7401                  534.2373            
      576.6960                  817.7682                  871.9379            
      917.7207                  978.5767                  989.2948            
     1056.1982                 1130.6006                 1160.8082            
     1215.2377                 1261.8162                 1278.7131            
     1308.6740                 1341.0988                 1362.0063            
     1399.2443                 1409.4212                 1476.6644            
     1490.7193                 1764.6782                 3063.6467            
     3091.5359                 3117.6738                 3151.0787            
     3153.2238                 3205.8634                 3858.7646            
Zero-point correction (Hartree): 0.111551

HOCHCHCH2CH2OO.Egppt
~~~~~~~~~~~~~~~~~~~~
E(UM062X/Aug-CC-pVTZ) (Hartree): -382.13943708 
Electronic state : 2-A
Cartesian coordinates (Angs):
     C       1.687236     -0.201097       0.290896
     C       0.928303      0.817527      -0.079823
     C      -0.388725      1.111221       0.566132
     C      -1.573046      0.788725      -0.329917
     O      -1.625150     -0.623845      -0.632210
     O      -1.858347     -1.327385       0.431741
     O       2.875457     -0.478173      -0.312634
     H       1.391623     -0.864289       1.097960
     H       1.258737      1.441503      -0.902645
     H      -0.499833      0.540022       1.488258
     H      -0.463606      2.168069       0.832364
     H      -2.520100      1.052277       0.139199
     H      -1.491630      1.262981      -1.306601
     H       3.266520     -1.263601       0.072556
Rotational constants (GHz):    4.8400900    1.4303100    1.2324500
Vibrational harmonic frequencies (cm-1):
       47.9251                   75.1564                  145.3360            
      199.4227                  255.2148                  299.2435            
      337.1138                  454.6666                  532.7269            
      576.7199                  824.7387                  880.4943            
      914.9683                  965.1112                  979.4742            
     1051.9435                 1134.6384                 1179.6874            
     1207.3830                 1246.9137                 1270.9962            
     1304.0541                 1339.5274                 1365.6406            
     1395.8855                 1399.3995                 1477.7779            
     1490.5910                 1787.2229                 3065.8359            
     3092.1485                 3116.9292                 3153.6702            
     3169.3150                 3183.6903                 3915.4862            
Zero-point correction (Hartree): 0.111259

HOCHCHCH2CH2OO.Egptt
~~~~~~~~~~~~~~~~~~~~
E(UM062X/Aug-CC-pVTZ) (Hartree): -382.13810416 
Electronic state : 2-A
Cartesian coordinates (Angs):
     C       1.871289     -0.153176       0.329989
     C       1.054218      0.635267      -0.348775
     C      -0.127526      1.310639       0.274269
     C      -1.450685      0.761239      -0.222213
     O      -1.582532     -0.580829       0.295585
     O      -2.656826     -1.158544      -0.143306
     O       2.936654     -0.767166      -0.254017
     H       1.728227     -0.344927       1.388712
     H       1.232642      0.780890      -1.408353
     H      -0.094393      1.210822       1.360925
     H      -0.117389      2.380612       0.054960
     H      -2.303019      1.331426       0.145625
     H      -1.494215      0.695959      -1.308917
     H       3.386003     -1.326284       0.381331
Rotational constants (GHz):    5.3088800    1.2317300    1.0613900
Vibrational harmonic frequencies (cm-1):
       44.1585                   72.5962                  110.5274            
      188.9176                  240.8283                  278.9011            
      332.8114                  396.6938                  537.4121            
      566.3702                  818.6533                  871.5105            
      917.0749                  963.8968                 1031.6287            
     1067.3404                 1123.0761                 1179.5649            
     1205.2590                 1250.2644                 1276.6812            
     1299.0977                 1337.7871                 1364.5492            
     1392.9945                 1406.0468                 1473.0211            
     1500.3771                 1790.1720                 3062.0313            
     3083.9850                 3105.3708                 3142.0309            
     3170.7630                 3183.3007                 3917.6972            
Zero-point correction (Hartree): 0.110954

HOCHCHCH2CH2OO.Elmmc
~~~~~~~~~~~~~~~~~~~~
E(CCSD(T)/Aug-CC-pVTZ) (Hartree): -381.59783370 
E(CCSD/Aug-CC-pVTZ) (Hartree): -381.53613947 
     T1 diagnostic:  0.021613 
E(MP2/Aug-CC-pVTZ) (Hartree): -381.49167334 
E(MP3/Aug-CC-pVTZ) (Hartree): -381.52332066 
E(PMP2/Aug-CC-pVTZ) (Hartree): -381.49483364 
E(PMP3/Aug-CC-pVTZ) (Hartree): -381.52518461 
E(PUHF/Aug-CC-pVTZ) (Hartree): -380.13467350 
E(UHF/Aug-CC-pVTZ) (Hartree): -380.12952628 
E(UM062X/Aug-CC-pVTZ) (Hartree): -382.14119558 
Electronic state : 2-A
Cartesian coordinates (Angs):
     C       2.124153      0.276916      -0.042485
     C       0.874173     -0.099991      -0.272337
     C      -0.241856      0.871925      -0.502115
     C      -1.331538      0.777029       0.551962
     O      -1.920688     -0.543726       0.557753
     O      -2.625917     -0.751207      -0.511793
     O       3.188259     -0.535457       0.177972
     H       2.419325      1.318728      -0.015007
     H       0.628268     -1.157591      -0.294153
     H       0.142333      1.893574      -0.495348
     H      -0.708634      0.706852      -1.475186
     H      -0.933191      0.894050       1.558058
     H      -2.137311      1.487177       0.372899
     H       2.906379     -1.454950       0.147128
Rotational constants (GHz):    7.1870100    1.0976100    1.0399700
Vibrational harmonic frequencies (cm-1):
       56.8155                   83.9327                  145.6926            
      184.7958                  282.8152                  330.2073            
      441.3317                  475.5827                  532.5543            
      584.2154                  819.8312                  856.1046            
      908.1255                  989.8147                  997.8385            
     1093.6706                 1120.4717                 1158.1126            
     1207.1273                 1245.8661                 1294.7724            
     1306.4289                 1340.7014                 1365.5644            
     1394.4322                 1413.1006                 1474.5714            
     1489.2539                 1763.9730                 3068.0372            
     3093.6743                 3112.8341                 3158.6898            
     3163.9251                 3203.8754                 3858.7945            
Zero-point correction (Hartree): 0.111670

HOCHCHCH2CH2OO.Elmmt
~~~~~~~~~~~~~~~~~~~~
E(UM062X/Aug-CC-pVTZ) (Hartree): -382.13870637 
Electronic state : 2-A
Cartesian coordinates (Angs):
     C       2.125235      0.248322      -0.058651
     C       0.872717     -0.128232      -0.259321
     C      -0.238762      0.845137      -0.498006
     C      -1.328976      0.766348       0.557172
     O      -1.950491     -0.538911       0.551717
     O      -2.674554     -0.711942      -0.511242
     O       3.126265     -0.649485       0.162286
     H       2.416229      1.294412      -0.065456
     H       0.636743     -1.185922      -0.247669
     H       0.146936      1.866620      -0.504487
     H      -0.709261      0.670049      -1.467856
     H      -0.927013      0.865361       1.563809
     H      -2.117523      1.497240       0.384897
     H       3.962841     -0.194512       0.267517
Rotational constants (GHz):    7.4165000    1.0823000    1.0299300
Vibrational harmonic frequencies (cm-1):
       58.1094                   83.5004                  145.1692            
      179.0405                  261.2688                  283.6740            
      343.9772                  473.3522                  529.3861            
      579.8470                  819.7825                  865.7344            
      908.1426                  967.9874                  997.4035            
     1095.1717                 1120.2871                 1176.8371            
     1197.1457                 1237.6120                 1272.9478            
     1306.9577                 1339.9534                 1366.4940            
     1393.0371                 1401.3962                 1474.2716            
     1488.3671                 1786.6412                 3064.6038            
     3092.0681                 3109.0438                 3157.2482            
     3166.1291                 3193.1663                 3917.7310            
Zero-point correction (Hartree): 0.111296

HOCHCHCH2CH2OO.Elmpc
~~~~~~~~~~~~~~~~~~~~
E(UM062X/Aug-CC-pVTZ) (Hartree): -382.14045498 
Electronic state : 2-A
Cartesian coordinates (Angs):
     C       1.990995      0.290723       0.147957
     C       0.783071      0.146789      -0.378955
     C      -0.267488      1.210011      -0.300446
     C      -1.511384      0.771514       0.459024
     O      -2.173244     -0.296686      -0.251029
     O      -1.760532     -1.467795       0.130963
     O       2.994221     -0.622237       0.132025
     H       2.297937      1.195879       0.657647
     H       0.524123     -0.780504      -0.880382
     H       0.132568      2.092020       0.204050
     H      -0.576875      1.525457      -1.299715
     H      -1.276596      0.401779       1.454863
     H      -2.249624      1.570606       0.506442
     H       2.693745     -1.425720      -0.304047
Rotational constants (GHz):    5.3864800    1.3147700    1.1153500
Vibrational harmonic frequencies (cm-1):
       63.8294                   89.1137                  132.6084            
      185.0105                  288.9820                  340.3975            
      444.6962                  474.8875                  529.9831            
      562.1000                  845.9667                  860.7239            
      884.3868                  990.1286                 1016.3122            
     1084.0668                 1116.5833                 1160.1911            
     1213.2703                 1237.8761                 1291.0053            
     1322.3524                 1344.0177                 1370.2374            
     1386.2854                 1415.5074                 1472.7173            
     1485.0646                 1763.5710                 3057.6900            
     3092.6181                 3104.3023                 3161.1612            
     3167.6961                 3201.1436                 3857.5971            
Zero-point correction (Hartree): 0.111662

HOCHCHCH2CH2OO.Elmpt
~~~~~~~~~~~~~~~~~~~~
E(UM062X/Aug-CC-pVTZ) (Hartree): -382.13752742 
Electronic state : 2-A
Cartesian coordinates (Angs):
     C       1.989507      0.262297       0.130044
     C       0.777124      0.125563      -0.382394
     C      -0.261349      1.198630      -0.291182
     C      -1.508613      0.770590       0.468626
     O      -2.193658     -0.275300      -0.251268
     O      -1.812128     -1.459012       0.124798
     O       2.930095     -0.719142       0.038424
     H       2.295569      1.168905       0.643384
     H       0.522343     -0.800812      -0.883005
     H       0.147817      2.075144       0.216406
     H      -0.571089      1.522324      -1.287893
     H      -1.275494      0.383278       1.458211
     H      -2.231510      1.582752       0.531264
     H       3.737879     -0.446456       0.475440
Rotational constants (GHz):    5.4572000    1.2998800    1.1070100
Vibrational harmonic frequencies (cm-1):
       64.2559                   86.3268                  130.5274            
      178.1882                  258.9797                  287.9710            
      353.5359                  474.4244                  526.6953            
      558.9309                  844.4467                  871.0567            
      882.9824                  970.8423                 1018.2529            
     1084.6321                 1117.4167                 1179.0426            
     1201.6086                 1237.9409                 1264.4799            
     1319.0775                 1345.9730                 1370.6756            
     1385.7920                 1403.8346                 1472.6167            
     1484.7002                 1785.9588                 3055.0045            
     3090.6026                 3101.1149                 3159.7897            
     3162.9384                 3196.9708                 3918.7962            
Zero-point correction (Hartree): 0.111280

HOCHCHCH2CH2OO.Elmtc
~~~~~~~~~~~~~~~~~~~~
E(UM062X/Aug-CC-pVTZ) (Hartree): -382.14044555 
Electronic state : 2-A
Cartesian coordinates (Angs):
     C       2.175963      0.186009       0.179724
     C       0.978214      0.057207      -0.373761
     C      -0.069240      1.126498      -0.303036
     C      -1.324123      0.674537       0.417155
     O      -1.901820     -0.397832      -0.361864
     O      -2.954285     -0.892729       0.211247
     O       3.175990     -0.730064       0.170248
     H       2.475424      1.081714       0.710223
     H       0.723648     -0.859065      -0.897583
     H       0.322422      1.997960       0.224062
     H      -0.351103      1.458940      -1.304999
     H      -1.111008      0.276191       1.408134
     H      -2.073764      1.462124       0.484559
     H       2.890411     -1.518371      -0.301936
Rotational constants (GHz):    7.0870600    1.0463600    0.9597700
Vibrational harmonic frequencies (cm-1):
       49.5994                   90.3886                  116.2541            
      189.2059                  270.1401                  329.0272            
      396.3809                  452.8971                  546.4457            
      570.7131                  812.1939                  856.0773            
      929.8350                  991.5934                 1033.3265            
     1078.2671                 1125.6248                 1160.3652            
     1217.0645                 1246.0738                 1296.9406            
     1298.3373                 1341.4574                 1365.5075            
     1398.7018                 1414.1608                 1472.0318            
     1501.0744                 1763.3001                 3060.7044            
     3085.6154                 3109.2440                 3146.6216            
     3165.8735                 3201.7740                 3857.2177            
Zero-point correction (Hartree): 0.111494

HOCHCHCH2CH2OO.Elmtt
~~~~~~~~~~~~~~~~~~~~
E(UM062X/Aug-CC-pVTZ) (Hartree): -382.13798496 
Electronic state : 2-A
Cartesian coordinates (Angs):
     C       2.173117      0.167424       0.157258
     C       0.970963      0.041464      -0.381228
     C      -0.072376      1.111851      -0.290724
     C      -1.324757      0.656602       0.432221
     O      -1.926112     -0.388564      -0.364734
     O      -2.984436     -0.874250       0.205234
     O       3.112428     -0.815310       0.071604
     H       2.470110      1.065938       0.689801
     H       0.724771     -0.874854      -0.904278
     H       0.322664      1.978532       0.242455
     H      -0.361053      1.454522      -1.287458
     H      -1.105852      0.232019       1.411023
     H      -2.063330      1.451864       0.527200
     H       3.915968     -0.547075       0.519265
Rotational constants (GHz):    7.2581100    1.0369700    0.9544000
Vibrational harmonic frequencies (cm-1):
       51.3622                   91.4555                  114.8537            
      180.4182                  259.3054                  273.7506            
      340.7793                  398.9651                  541.7653            
      570.7578                  811.9286                  867.1642            
      927.9807                  970.4569                 1033.7417            
     1079.4163                 1128.4707                 1178.0868            
     1206.8534                 1237.1343                 1279.3676            
     1297.4922                 1339.9602                 1367.0724            
     1398.1003                 1403.2247                 1471.8138            
     1500.6779                 1786.2808                 3058.6410            
     3085.1347                 3105.6017                 3145.9876            
     3164.0356                 3195.5698                 3917.2662            
Zero-point correction (Hartree): 0.111131

HOCHCHCH2CH2OO.Elpmc
~~~~~~~~~~~~~~~~~~~~
E(UM062X/Aug-CC-pVTZ) (Hartree): -382.14031527 
Electronic state : 2-A
Cartesian coordinates (Angs):
     C      -1.716898      0.146092      -0.385021
     C      -0.768732      0.610804       0.416624
     C       0.428961      1.348511      -0.088900
     C       1.742575      0.638342       0.211557
     O       1.802244     -0.622303      -0.477781
     O       1.259329     -1.577483       0.218050
     O      -2.823031     -0.544588      -0.015065
     H      -1.686140      0.288376      -1.458048
     H      -0.834430      0.427859       1.485386
     H       0.348477      1.499505      -1.166609
     H       0.496962      2.339651       0.368448
     H       2.593005      1.204843      -0.164387
     H       1.864156      0.433781       1.274056
     H      -2.805809     -0.701510       0.933953
Rotational constants (GHz):    4.6279400    1.5523400    1.2629400
Vibrational harmonic frequencies (cm-1):
       62.2880                   96.0757                  108.9101            
      193.1536                  290.6709                  350.8344            
      422.9886                  466.9158                  540.3184            
      553.9728                  824.1871                  861.6162            
      942.6393                  983.8111                  993.8037            
     1040.3522                 1132.5951                 1164.1930            
     1225.5704                 1237.3195                 1280.0041            
     1318.0575                 1343.4109                 1360.5222            
     1394.6357                 1413.1371                 1473.5582            
     1485.7583                 1764.5370                 3051.7259            
     3091.9388                 3105.8278                 3154.9038            
     3159.3070                 3207.7406                 3860.3590            
Zero-point correction (Hartree): 0.111534

HOCHCHCH2CH2OO.Elpmt
~~~~~~~~~~~~~~~~~~~~
E(UM062X/Aug-CC-pVTZ) (Hartree): -382.13829904 
Electronic state : 2-A
Cartesian coordinates (Angs):
     C       1.679246      0.110683       0.354616
     C       0.765612      0.682938      -0.412719
     C      -0.448739      1.353033       0.142140
     C      -1.743553      0.626339      -0.199469
     O      -1.783544     -0.650949       0.461241
     O      -1.236397     -1.586352      -0.258257
     O       2.781777     -0.496873      -0.162806
     H       1.592392      0.106015       1.436620
     H       0.886845      0.636445      -1.488836
     H      -0.374506      1.436458       1.227989
     H      -0.541797      2.369393      -0.249760
     H      -2.611147      1.164789       0.178867
     H      -1.844907      0.444686      -1.267936
     H       3.283043     -0.922361       0.534221
Rotational constants (GHz):    4.5792500    1.5738300    1.2710500
Vibrational harmonic frequencies (cm-1):
       56.7528                   97.4223                  108.0751            
      185.1658                  241.9628                  299.6491            
      352.1428                  462.0451                  539.3009            
      549.7923                  828.6190                  865.8652            
      946.9980                  961.6997                  986.9639            
     1038.2792                 1136.0127                 1180.7630            
     1211.3605                 1235.3846                 1257.8402            
     1313.9456                 1340.3052                 1361.4416            
     1392.6747                 1399.1790                 1473.5968            
     1484.3704                 1787.1973                 3054.9106            
     3091.7525                 3103.3339                 3155.9447            
     3170.1119                 3189.6327                 3917.6516            
Zero-point correction (Hartree): 0.111125

HOCHCHCH2CH2OO.Elptc
~~~~~~~~~~~~~~~~~~~~
E(UM062X/Aug-CC-pVTZ) (Hartree): -382.13968393 
Electronic state : 2-A
Cartesian coordinates (Angs):
     C      -1.897069     -0.144664      -0.371056
     C      -1.056654      0.583217       0.350585
     C       0.114627      1.304085      -0.242630
     C       1.447573      0.762783       0.234917
     O       1.597683     -0.567063      -0.306902
     O       2.675606     -1.139922       0.129742
     O      -2.970820     -0.834603       0.085399
     H      -1.789832     -0.253802      -1.443022
     H      -1.197984      0.654553       1.425816
     H       0.080097      1.244268      -1.331847
     H       0.085634      2.364985       0.016705
     H       2.288937      1.353669      -0.125466
     H       1.498795      0.678604       1.320216
     H      -3.036259     -0.742095       1.040786
Rotational constants (GHz):    5.3681500    1.2172800    1.0551600
Vibrational harmonic frequencies (cm-1):
       47.1882                   74.8600                  110.7871            
      204.1682                  265.0175                  334.2196            
      391.4892                  446.2482                  540.5382            
      567.6268                  814.9271                  863.6201            
      917.8374                  988.6263                 1035.2476            
     1069.2262                 1122.3981                 1159.4625            
     1215.5601                 1267.2054                 1288.0298            
     1298.6105                 1341.6350                 1362.4937            
     1398.3535                 1414.8400                 1472.9430            
     1500.9427                 1766.3020                 3062.0597            
     3082.9820                 3106.9162                 3140.2931            
     3153.5250                 3208.4551                 3860.2757            
Zero-point correction (Hartree): 0.111391

HOCHCHCH2CH2OO.Eltmc
~~~~~~~~~~~~~~~~~~~~
E(CCSD(T)/Aug-CC-pVTZ) (Hartree): -381.59757712 
E(CCSD/Aug-CC-pVTZ) (Hartree): -381.53594843 
     T1 diagnostic:  0.021541 
E(MP2/Aug-CC-pVTZ) (Hartree): -381.49136426 
E(MP3/Aug-CC-pVTZ) (Hartree): -381.52330142 
E(PMP2/Aug-CC-pVTZ) (Hartree): -381.49452390 
E(PMP3/Aug-CC-pVTZ) (Hartree): -381.52516264 
E(PUHF/Aug-CC-pVTZ) (Hartree): -380.13519483 
E(UHF/Aug-CC-pVTZ) (Hartree): -380.13005206 
E(UM062X/Aug-CC-pVTZ) (Hartree): -382.14085582 
Electronic state : 2-A
Cartesian coordinates (Angs):
     C      -2.116996      0.458740       0.023049
     C      -1.201545     -0.458753       0.304944
     C       0.215959     -0.116171       0.646310
     C       1.167619     -0.590526      -0.439314
     O       2.539002     -0.357420      -0.056058
     O       2.828865      0.907518      -0.091009
     O      -3.413943      0.237036      -0.302756
     H      -1.893836      1.518356       0.037417
     H      -1.476744     -1.509855       0.279228
     H       0.330920      0.961839       0.759748
     H       0.510763     -0.579923       1.590163
     H       1.107798     -1.667516      -0.590321
     H       0.992433     -0.071408      -1.380229
     H      -3.592948     -0.708296      -0.307352
Rotational constants (GHz):   10.0368700    0.9316200    0.9000000
Vibrational harmonic frequencies (cm-1):
       62.6193                   86.0716                  114.6904            
      178.5780                  307.7151                  321.7048            
      372.5639                  446.0057                  522.6093            
      624.6712                  795.8463                  850.8975            
      958.7976                  991.0461                 1019.8069            
     1068.2658                 1129.2750                 1160.1231            
     1220.7535                 1266.9190                 1283.4531            
     1312.2745                 1329.5215                 1347.5466            
     1395.5665                 1412.2663                 1485.2413            
     1499.6656                 1761.8549                 3064.9628            
     3093.7449                 3118.4546                 3151.9409            
     3157.1601                 3205.8173                 3858.7043            
Zero-point correction (Hartree): 0.111578

HOCHCHCH2CH2OO.Eltmt
~~~~~~~~~~~~~~~~~~~~
E(UM062X/Aug-CC-pVTZ) (Hartree): -382.13929131 
Electronic state : 2-A
Cartesian coordinates (Angs):
     C      -2.116572      0.416829       0.046261
     C      -1.191134     -0.498223       0.288145
     C       0.220217     -0.150112       0.644152
     C       1.178600     -0.580618      -0.453727
     O       2.546494     -0.334731      -0.064552
     O       2.817275      0.934757      -0.071963
     O      -3.393009      0.084359      -0.290855
     H      -1.898587      1.478277       0.110791
     H      -1.466099     -1.544455       0.212146
     H       0.326348      0.924914       0.792302
     H       0.517839     -0.642064       1.572851
     H       1.135422     -1.653914      -0.632830
     H       0.995182     -0.039785      -1.380697
     H      -3.922847      0.874692      -0.404589
Rotational constants (GHz):   10.0574900    0.9318000    0.9003200
Vibrational harmonic frequencies (cm-1):
       62.7043                   88.0215                  115.2441            
      181.9248                  265.8166                  316.5343            
      323.3749                  385.1449                  520.7013            
      621.7596                  796.6855                  865.7763            
      956.6579                  970.6860                 1017.8475            
     1067.6172                 1133.8664                 1179.0186            
     1212.3615                 1246.3360                 1283.4095            
     1299.5434                 1330.5167                 1356.9055            
     1382.7914                 1407.6503                 1484.8791            
     1499.8352                 1785.0922                 3063.0106            
     3094.1621                 3115.4457                 3156.4935            
     3171.1139                 3181.9716                 3915.6844            
Zero-point correction (Hartree): 0.111303

HOCHCHCH2CH2OO.Eltpc
~~~~~~~~~~~~~~~~~~~~
E(CCSD(T)/Aug-CC-pVTZ) (Hartree): -381.59774833 
E(CCSD/Aug-CC-pVTZ) (Hartree): -381.53608544 
     T1 diagnostic:  0.021615 
E(MP2/Aug-CC-pVTZ) (Hartree): -381.49148884 
E(MP3/Aug-CC-pVTZ) (Hartree): -381.52339626 
E(PMP2/Aug-CC-pVTZ) (Hartree): -381.49466624 
E(PMP3/Aug-CC-pVTZ) (Hartree): -381.52527544 
E(PUHF/Aug-CC-pVTZ) (Hartree): -380.13522254 
E(UHF/Aug-CC-pVTZ) (Hartree): -380.13007016 
E(UM062X/Aug-CC-pVTZ) (Hartree): -382.14108463 
Electronic state : 2-A
Cartesian coordinates (Angs):
     C       2.234338      0.135592      -0.357583
     C       1.152266     -0.409745       0.181764
     C      -0.208548     -0.304048      -0.433368
     C      -1.139220      0.517425       0.443306
     O      -2.467277      0.557499      -0.118814
     O      -3.071055     -0.583770       0.015422
     O       3.496844      0.090426       0.134221
     H       2.198969      0.685380      -1.290008
     H       1.240777     -0.954326       1.118051
     H      -0.143183      0.158791      -1.418965
     H      -0.656921     -1.291129      -0.560283
     H      -1.221690      0.101001       1.446713
     H      -0.828505      1.559128       0.495662
     H       3.509436     -0.407433       0.957481
Rotational constants (GHz):   13.1446600    0.8826300    0.8713100
Vibrational harmonic frequencies (cm-1):
       67.8392                   71.8809                  132.1719            
      170.9503                  293.7329                  332.8483            
      372.3254                  440.9682                  536.2726            
      616.7591                  789.1311                  849.8083            
      973.1622                  989.9596                 1014.5884            
     1068.2345                 1126.4066                 1158.0426            
     1225.3138                 1255.7702                 1293.0913            
     1309.0186                 1331.2088                 1346.1744            
     1393.1945                 1412.4869                 1483.8683            
     1498.2063                 1764.3313                 3068.2706            
     3092.7231                 3113.9544                 3151.3558            
     3158.2694                 3205.3995                 3859.9303            
Zero-point correction (Hartree): 0.111557

HOCHCHCH2CH2OO.Eltpt
~~~~~~~~~~~~~~~~~~~~
E(UM062X/Aug-CC-pVTZ) (Hartree): -382.13930049 
Electronic state : 2-A
Cartesian coordinates (Angs):
     C      -2.230972      0.064200       0.344730
     C      -1.142923     -0.387317      -0.259035
     C       0.211479     -0.361046       0.375652
     C       1.147173      0.565479      -0.382958
     O       2.467725      0.545511       0.198395
     O       3.082314     -0.567691      -0.062484
     O      -3.453504      0.041539      -0.254464
     H      -2.198295      0.469898       1.351149
     H      -1.236164     -0.785712      -1.263260
     H       0.141500     -0.028243       1.412508
     H       0.660147     -1.356295       0.376634
     H       1.244648      0.273692      -1.427997
     H       0.830008      1.604246      -0.313275
     H      -4.122658      0.379656       0.342337
Rotational constants (GHz):   13.3164800    0.8817100    0.8703500
Vibrational harmonic frequencies (cm-1):
       68.0919                   72.1152                  131.6989            
      167.9317                  240.6208                  305.5826            
      330.2599                  384.9810                  534.3830            
      612.6315                  793.2149                  862.2344            
      970.0369                  973.8711                 1011.7579            
     1068.5068                 1129.8299                 1178.0602            
     1214.5548                 1242.4344                 1280.3932            
     1305.1409                 1331.0117                 1354.6634            
     1382.6060                 1408.1982                 1484.8761            
     1499.3454                 1785.4662                 3065.4744            
     3093.5087                 3110.7624                 3157.8435            
     3168.6656                 3184.8947                 3916.5030            
Zero-point correction (Hartree): 0.111225

HOCHCHCH2CH2OO.Elttc
~~~~~~~~~~~~~~~~~~~~
E(UM062X/Aug-CC-pVTZ) (Hartree): -382.14004222 
Electronic state : 2-A
Cartesian coordinates (Angs):
     C      -2.275809      0.148690      -0.367891
     C      -1.260724      0.112279       0.484643
     C       0.071423      0.733498       0.193929
     C       1.150763     -0.325924       0.094412
     O       2.412869      0.349900      -0.093776
     O       3.395681     -0.491871      -0.180792
     O      -3.506287     -0.390315      -0.187617
     H      -2.204780      0.644611      -1.328060
     H      -1.382734     -0.396042       1.437314
     H       0.028218      1.293552      -0.740915
     H       0.348530      1.438096       0.981051
     H       1.231526     -0.919900       1.004892
     H       0.998327     -0.988116      -0.756826
     H      -3.551102     -0.825174       0.669474
Rotational constants (GHz):   13.6874400    0.8329600    0.8191700
Vibrational harmonic frequencies (cm-1):
       60.8092                   90.3699                   93.3198            
      165.2775                  280.7597                  313.8347            
      355.1919                  453.9746                  528.9095            
      593.7630                  785.7557                  851.2485            
      989.6390                  993.0427                 1029.7627            
     1104.1590                 1122.0018                 1159.0048            
     1206.0828                 1269.0806                 1294.2590            
     1309.3283                 1318.2802                 1346.6675            
     1397.3583                 1419.6101                 1490.8330            
     1507.2386                 1765.0976                 3063.5670            
     3084.8968                 3108.9567                 3144.2032            
     3154.2420                 3207.2976                 3859.5147            
Zero-point correction (Hartree): 0.111442

HOCHCHCH2CH2OO.Elttt
~~~~~~~~~~~~~~~~~~~~
E(UM062X/Aug-CC-pVTZ) (Hartree): -382.13833875 
Electronic state : 2-A
Cartesian coordinates (Angs):
     C      -2.273429      0.105513      -0.345910
     C      -1.250519      0.154109       0.492492
     C       0.075477      0.744656       0.126087
     C       1.158404     -0.315660       0.135892
     O       2.416046      0.340116      -0.137218
     O       3.400500     -0.503981      -0.153931
     O      -3.469088     -0.443689       0.003341
     H      -2.206311      0.507793      -1.351936
     H      -1.375714     -0.260890       1.486384
     H       0.027645      1.201252      -0.863577
     H       0.354735      1.529938       0.832104
     H       1.248309     -0.804624       1.105828
     H       1.003251     -1.068940      -0.635313
     H      -4.091178     -0.375805      -0.722381
Rotational constants (GHz):   13.8484500    0.8326000    0.8185100
Vibrational harmonic frequencies (cm-1):
       57.7469                   90.3574                  103.0039            
      158.1623                  229.2563                  299.1034            
      314.3737                  359.8705                  526.9658            
      590.0482                  784.7093                  863.0777            
      967.4995                  986.9136                 1029.3380            
     1103.2365                 1124.1121                 1179.2551            
     1199.0412                 1244.0592                 1293.4717            
     1302.6613                 1312.7888                 1355.5095            
     1382.0788                 1415.5474                 1491.3168            
     1507.2022                 1788.3995                 3061.7607            
     3086.0660                 3106.1688                 3145.2990            
     3169.8118                 3184.8758                 3916.9350            
Zero-point correction (Hartree): 0.111015


TS.HOCHCHCH2CH2OO.cycHOCHCHCH2CH2OO.Ec.b
~~~~~~~~~~~~~~~~~~~~~~~~~~~~~~~~~~~~~~~~
E(UM062X/Aug-CC-pVTZ) (Hartree): -382.10724016 
Electronic state : 2-A
Cartesian coordinates (Angs):
     C       1.217486      0.279742       0.364305
     C       0.341773      1.097742      -0.320596
     C      -1.027092      1.246613       0.229747
     C      -1.844235     -0.064593      -0.045476
     O      -0.992753     -1.095210      -0.485394
     O       0.005605     -1.255843       0.439528
     O       2.391428     -0.139894      -0.136307
     H       1.213890      0.247341       1.445253
     H       0.518331      1.286381      -1.373712
     H      -0.974047      1.394725       1.307886
     H      -1.549034      2.096788      -0.204608
     H      -2.361650     -0.370132       0.865237
     H      -2.563582      0.066706      -0.852405
     H       2.354263     -0.151259      -1.098142
Rotational constants (GHz):    4.7724200    2.2768000    1.7445200
Vibrational harmonic frequencies (cm-1):
     i685.0331                   79.5739                  248.9258            
      266.7727                  368.0530                  402.7393            
      421.1075                  441.7393                  542.8748            
      651.4000                  781.5885                  819.2272            
      891.5753                  903.7398                  977.2995            
     1039.4828                 1100.8839                 1133.4693            
     1159.3361                 1225.4296                 1268.0599            
     1279.5097                 1296.2485                 1321.3174            
     1371.2509                 1405.3781                 1487.8162            
     1504.3742                 1563.6009                 3068.4393            
     3087.8182                 3127.3766                 3146.3952            
     3173.8162                 3211.4429                 3854.2426            
Zero-point correction (Hartree): 0.110770

TS.HOCHCHCH2CH2OO.cycHOCHCHCH2CH2OO.Ec
~~~~~~~~~~~~~~~~~~~~~~~~~~~~~~~~~~~~~~
E(CCSD(T)/Aug-CC-pVTZ) (Hartree): -381.57644612 
E(CCSD/Aug-CC-pVTZ) (Hartree): -381.50999223 
     T1 diagnostic:  0.028421 
E(MP2/Aug-CC-pVTZ) (Hartree): -381.46077651 
E(MP3/Aug-CC-pVTZ) (Hartree): -381.49072084 
E(PMP2/Aug-CC-pVTZ) (Hartree): -381.47834524 
E(PMP3/Aug-CC-pVTZ) (Hartree): -381.50387730 
E(PUHF/Aug-CC-pVTZ) (Hartree): -380.10921509 
E(UHF/Aug-CC-pVTZ) (Hartree): -380.08883155 
E(UM062X/Aug-CC-pVTZ) (Hartree): -382.11687402 
Electronic state : 2-A
Cartesian coordinates (Angs):
     C       1.155879      0.174702       0.396882
     C       0.378016      1.143937      -0.200909
     C      -1.050426      1.263609       0.187134
     C      -1.791931     -0.024462      -0.246750
     O      -1.122666     -1.127408       0.316294
     O       0.084327     -1.281446      -0.319510
     O       2.404324     -0.122337       0.004603
     H       0.959046     -0.158255       1.406366
     H       0.705464      1.550892      -1.151471
     H      -1.160467      1.353572       1.268525
     H      -1.521335      2.128324      -0.278811
     H      -2.806017     -0.050121       0.151243
     H      -1.807149     -0.117482      -1.333491
     H       2.553350      0.195881      -0.891592
Rotational constants (GHz):    4.8099700    2.3018300    1.7081900
Vibrational harmonic frequencies (cm-1):
     i612.2148                  155.8931                  259.5245            
      308.9601                  339.9696                  400.6085            
      432.1901                  440.3496                  541.4172            
      590.7723                  747.5627                  862.9943            
      933.5439                  972.9901                  987.3404            
     1024.8407                 1090.4612                 1128.1823            
     1165.3542                 1214.9112                 1262.3010            
     1277.6477                 1318.6330                 1327.6199            
     1367.9829                 1403.7461                 1484.0993            
     1488.6522                 1571.1142                 3073.6098            
     3076.3357                 3128.1857                 3139.6010            
     3172.6958                 3222.8911                 3853.6386            
Zero-point correction (Hartree): 0.111099

TS.HOCHCHCH2CH2OO.cycHOCHCHCH2CH2OO.Et.b
~~~~~~~~~~~~~~~~~~~~~~~~~~~~~~~~~~~~~~~~
E(UM062X/Aug-CC-pVTZ) (Hartree): -382.10677807 
Electronic state : 2-A
Cartesian coordinates (Angs):
     C       1.214263      0.289700       0.332681
     C       0.326195      1.114648      -0.316324
     C      -1.033088      1.235463       0.261697
     C      -1.845033     -0.070021      -0.053565
     O      -0.991057     -1.100931      -0.491333
     O       0.004584     -1.260867       0.433509
     O       2.353683     -0.063418      -0.294347
     H       1.212212      0.218401       1.414086
     H       0.498114      1.324250      -1.363766
     H      -0.967915      1.341177       1.344097
     H      -1.571161      2.095330      -0.132183
     H      -2.385987     -0.385297       0.840440
     H      -2.544451      0.076333      -0.875285
     H       2.847487     -0.687210       0.243044
Rotational constants (GHz):    4.7508600    2.2809700    1.7416400
Vibrational harmonic frequencies (cm-1):
     i672.3229                   91.4225                  248.4742            
      275.6830                  318.7083                  368.7678            
      416.8751                  431.7870                  540.0841            
      655.4871                  795.1183                  823.1929            
      885.9184                  903.5206                  972.9894            
     1036.2457                 1094.7108                 1133.0696            
     1177.5571                 1217.2911                 1251.4219            
     1276.5256                 1297.2793                 1318.4758            
     1357.5098                 1390.8892                 1487.3773            
     1503.7334                 1588.4282                 3065.0986            
     3087.2872                 3126.5789                 3145.9153            
     3174.3288                 3205.5509                 3893.7939            
Zero-point correction (Hartree): 0.110621

TS.HOCHCHCH2CH2OO.cycHOCHCHCH2CH2OO.Et
~~~~~~~~~~~~~~~~~~~~~~~~~~~~~~~~~~~~~~
E(CCSD(T)/Aug-CC-pVTZ) (Hartree): -381.57685956 
E(CCSD/Aug-CC-pVTZ) (Hartree): -381.51053770 
     T1 diagnostic:  0.028927 
E(MP2/Aug-CC-pVTZ) (Hartree): -381.46051972 
E(MP3/Aug-CC-pVTZ) (Hartree): -381.49081210 
E(PMP2/Aug-CC-pVTZ) (Hartree): -381.47833678 
E(PMP3/Aug-CC-pVTZ) (Hartree): -381.50423593 
E(PUHF/Aug-CC-pVTZ) (Hartree): -380.11048561 
E(UHF/Aug-CC-pVTZ) (Hartree): -380.08990202 
E(UM062X/Aug-CC-pVTZ) (Hartree): -382.11743003 
Electronic state : 2-A
Cartesian coordinates (Angs):
     C       1.147043      0.214569       0.362170
     C       0.350660      1.166516      -0.223427
     C      -1.071962      1.255057       0.192903
     C      -1.791056     -0.052670      -0.223763
     O      -1.091404     -1.144407       0.327652
     O       0.098491     -1.285160      -0.343113
     O       2.388067      0.005591      -0.115672
     H       0.939296     -0.138660       1.365124
     H       0.673943      1.583833      -1.167781
     H      -1.167356      1.347532       1.275518
     H      -1.573728      2.104419      -0.268728
     H      -2.797301     -0.098079       0.192044
     H      -1.822870     -0.148961      -1.309517
     H       2.778671     -0.759101       0.315106
Rotational constants (GHz):    4.7651800    2.3156100    1.7036200
Vibrational harmonic frequencies (cm-1):
     i590.6847                  159.4186                  269.6552            
      294.5891                  342.8123                  374.2063            
      399.9901                  435.6672                  538.4892            
      595.4815                  773.5039                  860.5234            
      934.0770                  971.0382                  982.5272            
     1020.8763                 1084.1233                 1128.2875            
     1182.8838                 1208.9500                 1256.2854            
     1265.7570                 1319.9350                 1332.9792            
     1358.1819                 1384.0530                 1483.8822            
     1488.5767                 1600.3175                 3075.6803            
     3076.1514                 3129.3890                 3140.5615            
     3185.3172                 3208.4006                 3884.7204            
Zero-point correction (Hartree): 0.111054


#################################################################################
Z-HOCH=CHCH2CH2OO ring closure
#################################################################################

HOCHCHCH2CH2OO.Zcptt
~~~~~~~~~~~~~~~~~~~~
E(UM062X/Aug-CC-pVTZ) (Hartree): -382.13711336 
Electronic state : 2-A
Cartesian coordinates (Angs):
     C      -1.776794     -0.554659      -0.256263
     C      -1.493800      0.732244      -0.393931
     C      -0.341202      1.507229       0.179422
     C       0.865022      0.702094       0.611509
     O       1.362636      0.001504      -0.550034
     O       2.306136     -0.829333      -0.236274
     O      -1.045956     -1.415474       0.509502
     H      -2.641959     -0.983117      -0.748092
     H      -2.189973      1.293835      -1.001782
     H      -0.017457      2.242074      -0.560669
     H      -0.672659      2.085016       1.047217
     H       1.667247      1.352616       0.959066
     H       0.637097     -0.043564       1.366069
     H      -1.284185     -2.321888       0.308221
Rotational constants (GHz):    3.9278800    2.0404800    1.5310900
Vibrational harmonic frequencies (cm-1):
       45.9236                   64.9179                  135.0800            
      247.0910                  265.4998                  269.3807            
      385.3755                  449.8302                  535.0364            
      742.0012                  759.3706                  851.3365            
      877.4570                  975.0962                 1014.7206            
     1055.0647                 1080.1995                 1130.9052            
     1232.4978                 1259.8112                 1284.3392            
     1303.6282                 1317.0023                 1385.4671            
     1420.2666                 1446.4422                 1472.3424            
     1505.9929                 1788.8382                 3052.2248            
     3086.2696                 3096.1607                 3178.5278            
     3182.7917                 3214.4693                 3910.7664            
Zero-point correction (Hartree): 0.111681

HOCHCHCH2CH2OO.Zctpt
~~~~~~~~~~~~~~~~~~~~
E(UM062X/Aug-CC-pVTZ) (Hartree): -382.13858979 
Electronic state : 2-A
Cartesian coordinates (Angs):
     C       2.258555      0.186620      -0.159502
     C       1.324382      1.115087      -0.020896
     C      -0.138910      0.947789       0.264829
     C      -0.670348     -0.470054       0.176316
     O      -2.097451     -0.455162       0.413555
     O      -2.742614      0.049252      -0.592871
     O       2.019007     -1.155385      -0.046563
     H       3.284895      0.462810      -0.367898
     H       1.671553      2.134578      -0.122294
     H      -0.365199      1.344959       1.258467
     H      -0.708414      1.553057      -0.443552
     H      -0.503577     -0.913031      -0.802703
     H      -0.273150     -1.120533       0.949555
     H       2.820279     -1.648133      -0.229019
Rotational constants (GHz):    6.2539000    1.3314300    1.1658700
Vibrational harmonic frequencies (cm-1):
       21.5428                   88.9392                  136.3872            
      180.6831                  222.3307                  282.7500            
      372.7885                  454.7840                  567.1876            
      745.0536                  765.6149                  806.7722            
      929.2624                  975.1060                  977.1411            
     1054.0019                 1098.4514                 1128.5862            
     1236.7695                 1247.2451                 1290.1310            
     1310.8892                 1328.5947                 1348.8740            
     1422.8371                 1441.6560                 1484.8573            
     1496.2722                 1791.5757                 3050.7558            
     3091.2172                 3117.6643                 3185.2642            
     3187.6863                 3213.3065                 3917.4230            
Zero-point correction (Hartree): 0.111563

HOCHCHCH2CH2OO.Zcttc
~~~~~~~~~~~~~~~~~~~~
E(UM062X/Aug-CC-pVTZ) (Hartree): -382.13442233 
Point group : CS
Electronic state : 2-A"
Cartesian coordinates (Angs):
     C      -0.377205     -2.307271       0.000000
     C       0.796415     -1.684238       0.000000
     C       1.154718     -0.224566       0.000000
     C      -0.000000      0.750786       0.000000
     O       0.571304      2.076013       0.000000
     O      -0.349166      2.989418       0.000000
     O      -1.641430     -1.809192       0.000000
     H      -0.408505     -3.388123       0.000000
     H       1.648626     -2.350758       0.000000
     H       1.777089     -0.010247       0.872495
     H       1.777089     -0.010247      -0.872495
     H      -0.617134      0.675760      -0.897332
     H      -0.617134      0.675760       0.897332
     H      -1.649264     -0.850327       0.000000
Rotational constants (GHz):    5.8449000    1.2754700    1.0608800
Vibrational harmonic frequencies (cm-1):
       43.1149 (  A")            81.4073 (  A")           129.0539 (  A')     
      149.1265 (  A")           268.3374 (  A')           311.4776 (  A")     
      379.5594 (  A')           482.1220 (  A")           508.2954 (  A')     
      751.1183 (  A")           767.0594 (  A')           814.7686 (  A")     
      913.8562 (  A')          1003.6698 (  A")          1031.8930 (  A')     
     1073.4671 (  A')          1088.9370 (  A")          1145.5511 (  A')     
     1230.7542 (  A')          1253.1947 (  A")          1290.3416 (  A')     
     1317.5934 (  A")          1342.4242 (  A')          1362.1290 (  A')     
     1427.3542 (  A')          1444.3698 (  A')          1497.6006 (  A')     
     1532.5811 (  A')          1767.2677 (  A')          3052.1786 (  A')     
     3061.3874 (  A')          3082.0577 (  A")          3121.4614 (  A")     
     3196.9164 (  A')          3224.9995 (  A')          3910.9139 (  A')     
Zero-point correction (Hartree): 0.111763

HOCHCHCH2CH2OO.Zcttt
~~~~~~~~~~~~~~~~~~~~
E(UM062X/Aug-CC-pVTZ) (Hartree): -382.13769930 
Point group : CS
Electronic state : 2-A"
Cartesian coordinates (Angs):
     C      -0.410643     -2.264632       0.000000
     C       0.790060     -1.705198       0.000000
     C       1.158136     -0.250913       0.000000
     C       0.000000      0.723795       0.000000
     O       0.595745      2.042813       0.000000
     O      -0.306243      2.973965       0.000000
     O      -1.579759     -1.557348       0.000000
     H      -0.514846     -3.342783       0.000000
     H       1.619897     -2.399009       0.000000
     H       1.783976     -0.042358       0.871782
     H       1.783976     -0.042358      -0.871782
     H      -0.624334      0.644558      -0.886550
     H      -0.624334      0.644558       0.886550
     H      -2.327588     -2.156356       0.000000
Rotational constants (GHz):    5.8453500    1.3275400    1.0964700
Vibrational harmonic frequencies (cm-1):
       17.2363 (  A")            78.2270 (  A")           128.1975 (  A")     
      138.3477 (  A')           253.4598 (  A')           270.7581 (  A")     
      380.3751 (  A')           456.1568 (  A")           510.4761 (  A')     
      745.6136 (  A")           770.0082 (  A')           803.5707 (  A")     
      930.3358 (  A')           978.1798 (  A")          1016.3361 (  A')     
     1069.1464 (  A')          1076.6634 (  A")          1144.0290 (  A')     
     1221.3629 (  A")          1252.0845 (  A')          1299.7341 (  A')     
     1314.2764 (  A')          1315.9130 (  A")          1340.0882 (  A')     
     1428.7474 (  A')          1443.9492 (  A')          1493.9967 (  A')     
     1503.7163 (  A')          1792.5665 (  A')          3051.8416 (  A')     
     3079.8236 (  A")          3111.9295 (  A')          3171.9629 (  A")     
     3187.6752 (  A')          3213.1564 (  A')          3916.7245 (  A')     
Zero-point correction (Hartree): 0.111418

HOCHCHCH2CH2OO.Zgpmc
~~~~~~~~~~~~~~~~~~~~
E(UM062X/Aug-CC-pVTZ) (Hartree): -382.14139996 
Electronic state : 2-A
Cartesian coordinates (Angs):
     C      -1.737468     -0.146900       0.370704
     C      -0.997116      0.936025       0.587248
     C       0.077260      1.427802      -0.337557
     C       1.434514      0.783067      -0.094846
     O       1.333949     -0.627424      -0.393721
     O       1.297258     -1.365867       0.677108
     O      -1.644538     -0.999462      -0.676321
     H      -2.531448     -0.435613       1.045857
     H      -1.192722      1.491430       1.493099
     H      -0.201334      1.255270      -1.380993
     H       0.200699      2.505915      -0.228546
     H       2.192512      1.171852      -0.773936
     H       1.761229      0.867044       0.938717
     H      -0.785432     -0.913843      -1.104020
Rotational constants (GHz):    3.6140200    2.2889700    1.7079300
Vibrational harmonic frequencies (cm-1):
       58.2574                   93.1132                  123.1605            
      232.3401                  265.0035                  361.0549            
      456.4881                  524.6469                  582.7744            
      657.9690                  761.3718                  837.5371            
      919.5851                  981.6888                  992.3137            
     1035.9988                 1083.2694                 1141.7043            
     1223.1119                 1228.6007                 1276.7832            
     1312.6929                 1350.0219                 1370.6682            
     1383.0603                 1438.3066                 1483.6831            
     1488.0368                 1742.8540                 3054.4239            
     3091.7480                 3110.0397                 3163.6564            
     3210.9156                 3231.1092                 3838.7502            
Zero-point correction (Hartree): 0.111873

HOCHCHCH2CH2OO.Zgppt
~~~~~~~~~~~~~~~~~~~~
E(UM062X/Aug-CC-pVTZ) (Hartree): -382.13954204 
Electronic state : 2-A
Cartesian coordinates (Angs):
     C       1.914859      0.090571      -0.431387
     C       0.985666      1.025018      -0.298066
     C      -0.116046      0.973688       0.714388
     C      -1.485281      0.843125       0.071006
     O      -1.596557     -0.397079      -0.661614
     O      -1.635879     -1.415766       0.141001
     O       1.969504     -0.998001       0.385586
     H       2.684108      0.156570      -1.191408
     H       1.022074      1.860050      -0.985306
     H       0.028552      0.133836       1.392152
     H      -0.126916      1.885411       1.316826
     H      -2.284305      0.853205       0.810695
     H      -1.659541      1.610620      -0.682013
     H       2.644287     -1.607334       0.083620
Rotational constants (GHz):    4.1422700    1.8180600    1.4550000
Vibrational harmonic frequencies (cm-1):
       28.3230                   59.2797                  144.7891            
      214.5535                  252.6226                  295.0937            
      378.7974                  519.7864                  568.4510            
      668.2856                  766.4669                  861.6718            
      890.9170                  973.7082                  995.9278            
     1047.5808                 1076.0585                 1148.4667            
     1215.0584                 1257.7825                 1277.3019            
     1296.0053                 1313.5432                 1357.1520            
     1398.7465                 1444.7125                 1481.0926            
     1490.7725                 1785.2217                 3064.5679            
     3089.8000                 3132.9715                 3151.1366            
     3184.5111                 3210.8037                 3919.8909            
Zero-point correction (Hartree): 0.111543

HOCHCHCH2CH2OO.Zgptc
~~~~~~~~~~~~~~~~~~~~
E(UM062X/Aug-CC-pVTZ) (Hartree): -382.14241976 
Electronic state : 2-A
Cartesian coordinates (Angs):
     C       1.897914     -0.385648      -0.365766
     C       1.383603      0.840262      -0.401496
     C       0.264452      1.332044       0.474141
     C      -1.122747      0.977069      -0.024651
     O      -1.262451     -0.455486       0.137606
     O      -2.386318     -0.899974      -0.330991
     O       1.496806     -1.417339       0.410545
     H       2.743478     -0.659416      -0.982587
     H       1.826601      1.532954      -1.102642
     H       0.369226      0.941970       1.491084
     H       0.315083      2.417337       0.557387
     H      -1.913850      1.441070       0.563359
     H      -1.261010      1.196692      -1.081776
     H       0.596840     -1.270578       0.724538
Rotational constants (GHz):    4.0906500    1.8775300    1.4146100
Vibrational harmonic frequencies (cm-1):
       68.9838                   87.6903                  136.6126            
      229.9296                  265.9066                  335.7055            
      440.9411                  503.4870                  609.9387            
      656.8277                  765.8418                  844.7707            
      899.0257                  994.9890                 1024.7678            
     1053.7330                 1087.6190                 1138.3086            
     1222.6732                 1254.0154                 1290.0043            
     1295.5010                 1353.6839                 1378.2692            
     1396.6054                 1439.7699                 1481.4740            
     1500.2293                 1746.2514                 3053.1188            
     3087.8198                 3118.3686                 3150.7968            
     3205.2596                 3225.7012                 3823.1965            
Zero-point correction (Hartree): 0.112013

HOCHCHCH2CH2OO.Zgtmt
~~~~~~~~~~~~~~~~~~~~
E(UM062X/Aug-CC-pVTZ) (Hartree): -382.14019926 
Electronic state : 2-A
Cartesian coordinates (Angs):
     C       2.270326     -0.081809       0.116109
     C       1.368345     -1.008545      -0.173754
     C      -0.033049     -0.679805      -0.596835
     C      -0.912228     -0.443690       0.621475
     O      -2.280375     -0.204704       0.228308
     O      -2.418909      0.964599      -0.318224
     O       1.972686      1.245837       0.034722
     H       3.276542     -0.331255       0.429921
     H       1.665202     -2.041996      -0.067885
     H      -0.047455      0.226657      -1.201609
     H      -0.455768     -1.491488      -1.188285
     H      -0.964202     -1.321549       1.263055
     H      -0.572122      0.420624       1.189408
     H       2.750225      1.776249       0.214973
Rotational constants (GHz):    5.5989900    1.3520200    1.1808600
Vibrational harmonic frequencies (cm-1):
       43.3704                   65.7348                  120.2632            
      202.9634                  257.3635                  286.3124            
      355.0370                  527.0481                  572.4761            
      679.5690                  764.8308                  817.1081            
      959.4980                  972.6762                  985.8933            
     1066.5337                 1079.6370                 1137.5424            
     1223.2900                 1259.5267                 1290.9339            
     1294.5599                 1306.4462                 1335.8659            
     1399.4687                 1434.0395                 1485.8825            
     1502.2942                 1772.3973                 3082.3660            
     3098.7856                 3130.6060                 3162.4014            
     3191.4227                 3226.1186                 3915.6145            
Zero-point correction (Hartree): 0.111644

HOCHCHCH2CH2OO.Zgtpc
~~~~~~~~~~~~~~~~~~~~
E(UM062X/Aug-CC-pVTZ) (Hartree): -382.14075752 
Electronic state : 2-A
Cartesian coordinates (Angs):
     C      -2.374942      0.337594       0.155917
     C      -1.213663      0.969303       0.026282
     C       0.051787      0.353347      -0.491740
     C       0.940906     -0.095044       0.658214
     O       2.162758     -0.680760       0.162951
     O       2.948064      0.222433      -0.339989
     O      -2.645564     -0.950933      -0.168538
     H      -3.253375      0.830196       0.548466
     H      -1.180539      2.000982       0.346920
     H      -0.142237     -0.503852      -1.142065
     H       0.609705      1.072998      -1.090594
     H       1.211162      0.739468       1.303249
     H       0.474510     -0.883184       1.247021
     H      -1.865818     -1.373723      -0.540433
Rotational constants (GHz):    7.9091100    1.1060900    1.0406700
Vibrational harmonic frequencies (cm-1):
       27.6412                   67.0647                  124.0091            
      202.9161                  276.6980                  353.9663            
      400.0936                  544.5398                  578.0624            
      659.8564                  773.9056                  803.7664            
      971.0301                  980.5378                  995.6468            
     1062.8364                 1078.2751                 1139.3897            
     1219.6081                 1248.4100                 1274.1562            
     1303.1465                 1327.5545                 1348.3426            
     1397.1146                 1436.2636                 1488.9787            
     1512.6791                 1754.1465                 3055.7317            
     3094.2064                 3114.3684                 3156.7534            
     3212.0556                 3233.4812                 3862.2667            
Zero-point correction (Hartree): 0.111811

HOCHCHCH2CH2OO.Zgtpt
~~~~~~~~~~~~~~~~~~~~
E(UM062X/Aug-CC-pVTZ) (Hartree): -382.14074793 
Electronic state : 2-A
Cartesian coordinates (Angs):
     C      -2.324227      0.311436       0.177412
     C      -1.219788      1.035274       0.068940
     C       0.059043      0.494489      -0.498552
     C       0.866340     -0.199202       0.587154
     O       2.103565     -0.717299       0.053086
     O       2.945104      0.237649      -0.200539
     O      -2.363701     -0.988806      -0.234841
     H      -3.239998      0.710018       0.596257
     H      -1.251137      2.050569       0.437250
     H      -0.153083     -0.226551      -1.288160
     H       0.664985      1.295553      -0.919357
     H       1.120232      0.478128       1.401064
     H       0.342422     -1.072435       0.970777
     H      -3.251384     -1.339617      -0.149199
Rotational constants (GHz):    7.5430100    1.1750500    1.0826100
Vibrational harmonic frequencies (cm-1):
       24.4640                   68.1809                  125.1362            
      203.0655                  252.2195                  270.6904            
      363.9977                  526.6943                  578.7486            
      676.4526                  766.1211                  809.5074            
      966.7978                  974.4646                  988.3892            
     1065.2591                 1078.1403                 1135.2163            
     1225.4347                 1262.0164                 1288.1527            
     1294.5643                 1310.5307                 1334.8408            
     1397.7532                 1434.8279                 1485.8232            
     1501.1418                 1774.3630                 3082.8514            
     3097.4074                 3132.3512                 3162.7554            
     3193.8803                 3228.2664                 3916.4641            
Zero-point correction (Hartree): 0.111623

HOCHCHCH2CH2OO.Zgttc
~~~~~~~~~~~~~~~~~~~~
E(UM062X/Aug-CC-pVTZ) (Hartree): -382.13967776 
Electronic state : 2-A
Cartesian coordinates (Angs):
     C       2.398795      0.120656      -0.319230
     C       1.388901      0.958388      -0.113563
     C       0.123169      0.616565       0.617809
     C      -0.960737      0.190896      -0.354749
     O      -2.151912     -0.090414       0.411191
     O      -3.129570     -0.472234      -0.351222
     O       2.490714     -1.166102       0.096813
     H       3.285422      0.415956      -0.862452
     H       1.484300      1.951272      -0.529376
     H       0.277657     -0.180984       1.349411
     H      -0.228776      1.479200       1.183930
     H      -1.203033      0.978332      -1.067333
     H      -0.693941     -0.714815      -0.898969
     H       1.703757     -1.418004       0.588932
Rotational constants (GHz):    7.1967100    1.0749200    1.0053600
Vibrational harmonic frequencies (cm-1):
       27.6140                   75.3062                  103.2976            
      164.6930                  279.9752                  327.4172            
      409.5551                  486.7181                  584.7638            
      659.6895                  772.5865                  798.5818            
      963.9454                  998.3189                 1023.3267            
     1066.5952                 1102.6237                 1135.4684            
     1203.3977                 1251.5210                 1290.0301            
     1301.4801                 1310.1920                 1349.7321            
     1403.9103                 1437.3067                 1501.7698            
     1515.9947                 1754.9348                 3056.6056            
     3086.3611                 3107.6039                 3144.8072            
     3213.9386                 3234.4311                 3863.8149            
Zero-point correction (Hartree): 0.111649

HOCHCHCH2CH2OO.Zgttt
~~~~~~~~~~~~~~~~~~~~
E(UM062X/Aug-CC-pVTZ) (Hartree): -382.13973051 
Electronic state : 2-A
Cartesian coordinates (Angs):
     C       2.351439      0.076127      -0.312571
     C       1.403691      0.990183      -0.166351
     C       0.127070      0.732235       0.579489
     C      -0.917596      0.150776      -0.353388
     O      -2.130330     -0.040952       0.408884
     O      -3.082366     -0.527365      -0.325056
     O       2.223606     -1.171407       0.223381
     H       3.264418      0.272205      -0.861180
     H       1.560642      1.950948      -0.635060
     H       0.303140      0.027431       1.391986
     H      -0.254728      1.656223       1.013054
     H      -1.154796      0.818428      -1.180964
     H      -0.613335     -0.819983      -0.742173
     H       3.019754     -1.683391       0.073604
Rotational constants (GHz):    6.8219700    1.1327600    1.0449100
Vibrational harmonic frequencies (cm-1):
       17.7531                   75.6068                  100.6331            
      163.6008                  251.6023                  256.2517            
      357.1504                  470.8270                  578.0969            
      671.1409                  764.7380                  804.8320            
      967.3141                  972.8733                 1022.0913            
     1068.3820                 1103.5542                 1130.0493            
     1208.6234                 1269.6215                 1292.2993            
     1293.7736                 1312.5331                 1316.4638            
     1403.7061                 1435.9979                 1494.8269            
     1505.7502                 1776.5340                 3080.9903            
     3090.6090                 3125.2729                 3151.1963            
     3192.8048                 3228.0659                 3916.2471            
Zero-point correction (Hartree): 0.111338

HOCHCHCH2CH2OO.Zlmmc
~~~~~~~~~~~~~~~~~~~~
E(UM062X/Aug-CC-pVTZ) (Hartree): -382.13994056 
Electronic state : 2-A
Cartesian coordinates (Angs):
     C       2.143768     -0.664679       0.139343
     C       0.823500     -0.626813       0.007766
     C       0.009027      0.560010      -0.410802
     C      -1.165145      0.807557       0.521676
     O      -2.073223     -0.316307       0.501905
     O      -2.704934     -0.391193      -0.629406
     O       3.028093      0.339703      -0.091022
     H       2.655945     -1.560534       0.461000
     H       0.286885     -1.541015       0.221674
     H       0.598678      1.479894      -0.427379
     H      -0.393321      0.426727      -1.417786
     H      -0.850580      0.878497       1.561091
     H      -1.737194      1.687549       0.232840
     H       2.573202      1.114817      -0.431159
Rotational constants (GHz):    8.3236200    1.1198900    1.0759200
Vibrational harmonic frequencies (cm-1):
       17.6350                   67.8239                  141.9868            
      214.7837                  252.1685                  318.5315            
      428.7667                  524.9213                  588.2432            
      647.9435                  778.0323                  823.9482            
      899.4037                  997.0807                 1004.6641            
     1043.3525                 1106.6705                 1128.8582            
     1219.1224                 1238.5768                 1279.6884            
     1305.2664                 1337.6068                 1369.0230            
     1397.5003                 1441.7449                 1472.6402            
     1491.9527                 1760.7025                 3057.5479            
     3090.4578                 3101.2578                 3159.9774            
     3209.5933                 3231.4405                 3876.0568            
Zero-point correction (Hartree): 0.111687

HOCHCHCH2CH2OO.Zlmmt
~~~~~~~~~~~~~~~~~~~~
E(UM062X/Aug-CC-pVTZ) (Hartree): -382.14069596 
Electronic state : 2-A
Cartesian coordinates (Angs):
     C      -2.088309     -0.661230      -0.159614
     C      -0.799558     -0.727793       0.137412
     C       0.004714      0.427704       0.647944
     C       1.058514      0.886017      -0.344729
     O       1.993842     -0.180062      -0.630865
     O       2.748805     -0.433773       0.393502
     O      -2.807425      0.491902      -0.019341
     H      -2.635411     -1.519816      -0.529306
     H      -0.303212     -1.676494      -0.011978
     H      -0.647327      1.274451       0.860453
     H       0.514923      0.159490       1.574692
     H       0.624742      1.125067      -1.313747
     H       1.637611      1.726756       0.033916
     H      -3.725278      0.337827      -0.246486
Rotational constants (GHz):    8.0364600    1.1756500    1.1218800
Vibrational harmonic frequencies (cm-1):
       23.9377                   62.4069                  135.4223            
      205.8432                  253.4339                  279.2227            
      389.6089                  524.3234                  602.4719            
      656.0122                  778.7954                  827.2330            
      890.9544                  976.7741                 1004.8483            
     1048.0315                 1099.1372                 1132.7352            
     1211.3681                 1247.2811                 1294.7766            
     1300.3257                 1305.2226                 1357.3751            
     1392.5991                 1444.6908                 1480.8993            
     1489.5894                 1781.4930                 3077.5404            
     3094.8937                 3130.4073                 3159.1728            
     3191.1439                 3224.0324                 3920.0462            
Zero-point correction (Hartree): 0.111617

HOCHCHCH2CH2OO.Zlmpc
~~~~~~~~~~~~~~~~~~~~
E(UM062X/Aug-CC-pVTZ) (Hartree): -382.13868808 
Electronic state : 2-A
Cartesian coordinates (Angs):
     C      -1.989705     -0.744530       0.029943
     C      -0.720256     -0.485431       0.318009
     C      -0.087986      0.872455       0.366130
     C       1.236003      0.929434      -0.382633
     O       2.209234      0.096137       0.280618
     O       2.301386     -1.081886      -0.259005
     O      -2.973361      0.146858      -0.259003
     H      -2.368788     -1.756248       0.000843
     H      -0.087874     -1.335139       0.534889
     H      -0.728776      1.638039      -0.079650
     H       0.094512      1.182833       1.398414
     H       1.147655      0.572355      -1.406187
     H       1.661348      1.931503      -0.357447
     H      -2.644486      1.046223      -0.180442
Rotational constants (GHz):    6.7689600    1.2445200    1.1083900
Vibrational harmonic frequencies (cm-1):
       18.0344                   91.5867                  105.7143            
      226.4445                  232.0717                  322.9611            
      433.7305                  515.3716                  568.8543            
      651.4993                  779.4896                  844.9060            
      878.1583                  999.1262                 1017.5783            
     1051.9170                 1093.4299                 1129.7210            
     1230.1992                 1236.6756                 1271.0215            
     1318.5707                 1345.2177                 1372.6220            
     1390.8427                 1445.6145                 1469.7737            
     1485.7653                 1760.8773                 3047.9076            
     3082.0069                 3098.8408                 3163.8554            
     3211.9308                 3234.1030                 3877.2726            
Zero-point correction (Hartree): 0.111639

HOCHCHCH2CH2OO.Zlmpt
~~~~~~~~~~~~~~~~~~~~
E(UM062X/Aug-CC-pVTZ) (Hartree): -382.13978773 
Electronic state : 2-A
Cartesian coordinates (Angs):
     C      -1.922704     -0.708652       0.104527
     C      -0.703461     -0.461169       0.557734
     C      -0.057498      0.888661       0.521306
     C       1.167248      0.936171      -0.379521
     O       2.204704      0.079601       0.144661
     O       2.144685     -1.121019      -0.347727
     O      -2.709907      0.267767      -0.438055
     H      -2.355496     -1.700688       0.142598
     H      -0.144789     -1.293540       0.961654
     H      -0.767207      1.631260       0.156524
     H       0.247172      1.192543       1.525260
     H       0.948198      0.597554      -1.389685
     H       1.610516      1.930687      -0.392956
     H      -3.555761     -0.098666      -0.698706
Rotational constants (GHz):    6.1146800    1.3366200    1.2016300
Vibrational harmonic frequencies (cm-1):
       27.3716                   88.2057                  114.5263            
      221.3444                  238.6604                  267.6976            
      403.9375                  513.5193                  587.8196            
      654.3555                  781.7969                  849.4386            
      877.1053                  977.9788                 1013.9296            
     1054.9938                 1090.2377                 1130.0488            
     1216.4038                 1236.8401                 1291.6605            
     1297.7336                 1321.4059                 1361.5667            
     1385.6273                 1446.8172                 1479.1669            
     1485.9362                 1781.7754                 3066.5438            
     3096.1160                 3123.3747                 3162.6365            
     3192.2612                 3226.0934                 3921.1846            
Zero-point correction (Hartree): 0.111599

HOCHCHCH2CH2OO.Zlmtc
~~~~~~~~~~~~~~~~~~~~
E(UM062X/Aug-CC-pVTZ) (Hartree): -382.13905289 
Electronic state : 2-A
Cartesian coordinates (Angs):
     C      -2.192234     -0.718371      -0.080291
     C      -0.903735     -0.591983       0.212102
     C      -0.170168      0.700361       0.418640
     C       1.165032      0.721580      -0.299271
     O       1.997363     -0.285070       0.318060
     O       3.143934     -0.386438      -0.278970
     O      -3.107001      0.273427      -0.230218
     H      -2.647185     -1.686944      -0.232436
     H      -0.333417     -1.505117       0.311545
     H      -0.739251      1.555554       0.046180
     H       0.009899      0.884330       1.481313
     H       1.071934      0.464778      -1.353488
     H       1.680731      1.674843      -0.191820
     H      -2.710451      1.127670      -0.039355
Rotational constants (GHz):    9.7604000    1.0288300    0.9728300
Vibrational harmonic frequencies (cm-1):
       19.6535                   66.5428                  120.1996            
      217.3154                  241.8543                  313.8582            
      388.7097                  501.0476                  578.1024            
      661.9453                  779.6506                  823.0225            
      908.1268                  998.9615                 1044.1810            
     1051.8555                 1090.0733                 1136.9804            
     1229.3177                 1236.2048                 1287.8689            
     1296.4890                 1335.1353                 1372.6237            
     1400.6148                 1444.0866                 1469.3469            
     1501.9053                 1759.4537                 3050.8456            
     3083.3175                 3094.3059                 3148.6704            
     3211.1193                 3233.2802                 3875.4610            
Zero-point correction (Hartree): 0.111567

HOCHCHCH2CH2OO.Zlmtt
~~~~~~~~~~~~~~~~~~~~
E(UM062X/Aug-CC-pVTZ) (Hartree): -382.14001114 
Electronic state : 2-A
Cartesian coordinates (Angs):
     C      -2.129890     -0.693101      -0.078516
     C      -0.912971     -0.635025       0.440602
     C      -0.162846      0.640650       0.675647
     C       1.084324      0.746825      -0.178450
     O       1.976008     -0.318638       0.223395
     O       3.051639     -0.340873      -0.499865
     O      -2.819622      0.428371      -0.441076
     H      -2.637773     -1.636103      -0.239607
     H      -0.434511     -1.570323       0.694454
     H      -0.799649      1.494655       0.448190
     H       0.129922      0.721365       1.724899
     H       0.872470      0.609029      -1.237642
     H       1.616475      1.684755      -0.024412
     H      -3.682831      0.189645      -0.781210
Rotational constants (GHz):    8.1761600    1.0884600    1.0485000
Vibrational harmonic frequencies (cm-1):
       23.2548                   68.7763                  118.9651            
      204.1627                  245.2082                  274.0911            
      350.5013                  480.3196                  602.0876            
      655.5972                  780.3875                  824.4920            
      907.0490                  976.6682                 1041.0311            
     1052.1215                 1085.7309                 1138.5377            
     1217.7992                 1245.1212                 1293.7441            
     1300.0195                 1304.5116                 1356.4493            
     1395.4060                 1446.1590                 1480.4572            
     1500.4784                 1781.5388                 3067.6293            
     3086.9684                 3129.9267                 3147.0592            
     3191.7444                 3226.1869                 3920.6148            
Zero-point correction (Hartree): 0.111450

HOCHCHCH2CH2OO.Zlpmt
~~~~~~~~~~~~~~~~~~~~
E(UM062X/Aug-CC-pVTZ) (Hartree): -382.13945018 
Electronic state : 2-A
Cartesian coordinates (Angs):
     C      -1.792042     -0.245705       0.497000
     C      -0.763719      0.514753       0.840462
     C       0.080855      1.269692      -0.135131
     C       1.532826      0.812047      -0.131362
     O       1.629254     -0.554384      -0.573924
     O       1.511557     -1.390915       0.414204
     O      -2.197243     -0.376930      -0.798829
     H      -2.365981     -0.794326       1.233637
     H      -0.507953      0.557576       1.890440
     H      -0.322875      1.165542      -1.141313
     H       0.084996      2.336127       0.106554
     H       2.127656      1.380476      -0.844490
     H       1.979199      0.862095       0.860435
     H      -2.891109     -1.034385      -0.862684
Rotational constants (GHz):    4.2484800    1.7298900    1.5147800
Vibrational harmonic frequencies (cm-1):
       17.9802                   96.2996                  108.0144            
      219.1300                  246.6748                  290.6683            
      387.2275                  523.5856                  545.1065            
      672.0064                  766.3136                  846.1595            
      923.9577                  971.3979                  991.2150            
     1047.3391                 1068.3295                 1149.5674            
     1225.9786                 1235.6111                 1284.1883            
     1297.3051                 1318.1810                 1360.7644            
     1393.2404                 1446.2410                 1477.8737            
     1486.1508                 1782.0974                 3058.1557            
     3092.6592                 3127.6936                 3155.3540            
     3189.6091                 3217.7380                 3919.5797            
Zero-point correction (Hartree): 0.111492

HOCHCHCH2CH2OO.Zlptt
~~~~~~~~~~~~~~~~~~~~
E(UM062X/Aug-CC-pVTZ) (Hartree): -382.13906481 
Electronic state : 2-A
Cartesian coordinates (Angs):
     C      -2.005846     -0.189901       0.557402
     C      -1.055449      0.728700       0.636447
     C      -0.149303      1.104773      -0.494933
     C       1.307147      0.824153      -0.185709
     O       1.465252     -0.607883      -0.080592
     O       2.673323     -0.927575       0.263857
     O      -2.267356     -0.865206      -0.597161
     H      -2.627361     -0.440774       1.408355
     H      -0.920009      1.219966       1.591008
     H      -0.434299      0.569448      -1.399886
     H      -0.232266      2.172840      -0.710148
     H       1.972741      1.163634      -0.978403
     H       1.622660      1.253347       0.765125
     H      -2.930518     -1.539498      -0.444117
Rotational constants (GHz):    5.0261900    1.3870900    1.2335400
Vibrational harmonic frequencies (cm-1):
       21.3258                   66.7347                  117.6948            
      209.2188                  235.3191                  293.1693            
      337.7011                  470.2339                  570.4101            
      675.2776                  764.1390                  852.0397            
      890.5305                  971.6337                 1039.7919            
     1062.8667                 1072.7564                 1140.2453            
     1216.0551                 1265.2629                 1288.7033            
     1296.4313                 1299.1031                 1356.4039            
     1399.5920                 1448.0565                 1478.8844            
     1502.9722                 1786.2420                 3066.2634            
     3082.7260                 3125.5137                 3141.4267            
     3187.1186                 3213.1129                 3920.4763            
Zero-point correction (Hartree): 0.111324

HOCHCHCH2CH2OO.Zpmmc
~~~~~~~~~~~~~~~~~~~~
E(CCSD(T)/Aug-CC-pVTZ) (Hartree): -381.60037010 
E(CCSD/Aug-CC-pVTZ) (Hartree): -381.53772838 
     T1 diagnostic:  0.022191 
E(MP2/Aug-CC-pVTZ) (Hartree): -381.49448818 
E(MP3/Aug-CC-pVTZ) (Hartree): -381.52479655 
E(PMP2/Aug-CC-pVTZ) (Hartree): -381.49774632 
E(PMP3/Aug-CC-pVTZ) (Hartree): -381.52669599 
E(PUHF/Aug-CC-pVTZ) (Hartree): -380.13149271 
E(UHF/Aug-CC-pVTZ) (Hartree): -380.12616632 
E(UM062X/Aug-CC-pVTZ) (Hartree): -382.14414641 
Electronic state : 2-A
Cartesian coordinates (Angs):
     C       1.838020      0.079555       0.342809
     C       1.016432      1.117681       0.218070
     C      -0.200990      1.144807      -0.658951
     C      -1.489617      0.807122       0.068881
     O      -1.451380     -0.522535       0.649006
     O      -1.199537     -1.432397      -0.236220
     O       1.729213     -1.129048      -0.251044
     H       2.725321      0.135368       0.959152
     H       1.258623      2.004009       0.787568
     H      -0.332366      2.141817      -1.082837
     H      -0.092628      0.466424      -1.506073
     H      -1.657397      1.451712       0.929058
     H      -2.353180      0.834791      -0.595467
     H       0.842185     -1.257284      -0.610196
Rotational constants (GHz):    3.8427200    2.2415600    1.6192300
Vibrational harmonic frequencies (cm-1):
       53.1930                  131.5021                  148.7968            
      214.3796                  291.8812                  357.7868            
      466.1477                  541.8760                  599.5496            
      667.3210                  761.4688                  849.8795            
      886.5390                  981.9506                  996.2389            
     1037.1786                 1088.8224                 1148.0690            
     1222.6972                 1260.3105                 1275.4686            
     1306.3988                 1351.2209                 1373.7689            
     1404.3696                 1442.6719                 1490.4872            
     1495.2118                 1747.8273                 3075.1083            
     3090.8924                 3114.1355                 3157.0129            
     3205.6803                 3226.0874                 3797.6382            
Zero-point correction (Hartree): 0.112222

HOCHCHCH2CH2OO.Zptpc
~~~~~~~~~~~~~~~~~~~~
E(UM062X/Aug-CC-pVTZ) (Hartree): -382.14299943 
Electronic state : 2-A
Cartesian coordinates (Angs):
     C       1.990719     -0.256495       0.149012
     C       1.485695      0.947781      -0.106531
     C       0.056334      1.134753      -0.529354
     C      -0.937822      0.806510       0.595548
     O      -2.050788      0.022964       0.099607
     O      -1.651134     -1.141169      -0.305940
     O       1.331854     -1.432158       0.068728
     H       3.017806     -0.397564       0.456449
     H       2.133420      1.803863       0.003447
     H      -0.110610      2.147300      -0.887896
     H      -0.173160      0.466885      -1.364114
     H      -0.471153      0.216023       1.382390
     H      -1.404024      1.688816       1.026043
     H       0.398713     -1.317709      -0.167528
Rotational constants (GHz):    4.3235600    1.9772300    1.4811700
Vibrational harmonic frequencies (cm-1):
       86.7356                  102.9580                  196.4536            
      219.3773                  324.4331                  366.9969            
      522.0243                  568.6202                  624.7459            
      707.6098                  753.2826                  813.2521            
      954.6509                  992.7960                 1003.1022            
     1032.6939                 1079.1186                 1135.4807            
     1230.2006                 1263.6910                 1287.2719            
     1308.1613                 1339.8173                 1375.1774            
     1399.4617                 1431.3431                 1493.5697            
     1509.4091                 1733.6295                 3059.1022            
     3101.0760                 3136.5884                 3168.4579            
     3216.8284                 3242.0571                 3721.9528            
Zero-point correction (Hartree): 0.112774


TS.HOCHCHCH2CH2OO.cycHOCHCHCH2CH2OO.Zp
~~~~~~~~~~~~~~~~~~~~~~~~~~~~~~~~~~~~~~
E(CCSD(T)/Aug-CC-pVTZ) (Hartree): -381.57530128 
E(CCSD/Aug-CC-pVTZ) (Hartree): -381.50813416 
     T1 diagnostic:  0.028163 
E(MP2/Aug-CC-pVTZ) (Hartree): -381.46065809 
E(MP3/Aug-CC-pVTZ) (Hartree): -381.48930848 
E(PMP2/Aug-CC-pVTZ) (Hartree): -381.47781124 
E(PMP3/Aug-CC-pVTZ) (Hartree): -381.50213210 
E(PUHF/Aug-CC-pVTZ) (Hartree): -380.10312287 
E(UHF/Aug-CC-pVTZ) (Hartree): -380.08321231 
E(UM062X/Aug-CC-pVTZ) (Hartree): -382.11528532 
Electronic state : 2-A
Cartesian coordinates (Angs):
     C      -1.313651      0.291233       0.341855
     C      -0.290224      1.192205       0.597926
     C       0.894511      1.228012      -0.296765
     C       1.630403     -0.125664      -0.144674
     O       0.687093     -1.170389      -0.292135
     O      -0.130432     -1.179717       0.824619
     O      -1.677701     -0.116515      -0.885788
     H      -2.107594      0.163169       1.065677
     H      -0.202646      1.551906       1.612946
     H       0.601424      1.347293      -1.342140
     H       1.571932      2.041338      -0.041842
     H       2.372267     -0.273285      -0.929519
     H       2.096557     -0.203814       0.837668
     H      -0.889856     -0.408346      -1.366413
Rotational constants (GHz):    3.8895600    2.8846500    2.2593700
Vibrational harmonic frequencies (cm-1):
     i623.4638                  177.6328                  248.3701            
      280.9721                  391.9599                  432.6138            
      452.0873                  500.3075                  587.6845            
      663.9523                  737.8072                  875.1450            
      919.1406                  932.5186                  979.4588            
     1017.9830                 1061.3809                 1077.5628            
     1148.8220                 1210.9937                 1256.2309            
     1268.3454                 1318.6422                 1340.3793            
     1369.6287                 1434.1885                 1484.4078            
     1497.9549                 1538.4045                 3065.6462            
     3076.6998                 3128.7866                 3140.1905            
     3209.6855                 3225.6704                 3759.1579            
Zero-point correction (Hartree): 0.111198

TS.HOCHCHCH2CH2OO.cycHOCHCHCH2CH2OO.Zt
~~~~~~~~~~~~~~~~~~~~~~~~~~~~~~~~~~~~~~
E(UM062X/Aug-CC-pVTZ) (Hartree): -382.11419635 
Electronic state : 2-A
Cartesian coordinates (Angs):
     C      -1.287511      0.259883       0.386557
     C      -0.294591      1.181154       0.633815
     C       0.851787      1.247950      -0.305377
     C       1.636262     -0.084230      -0.149982
     O       0.753486     -1.169180      -0.328771
     O      -0.090769     -1.241275       0.751995
     O      -1.630822     -0.007392      -0.891770
     H      -2.019276      0.015380       1.147963
     H      -0.171789      1.509338       1.655646
     H       0.518979      1.326247      -1.338814
     H       1.519237      2.078630      -0.080707
     H       2.397095     -0.186422      -0.923444
     H       2.090673     -0.145555       0.840312
     H      -2.025769     -0.883393      -0.942661
Rotational constants (GHz):    3.8492700    2.8899600    2.2304200
Vibrational harmonic frequencies (cm-1):
     i636.9546                  172.7885                  237.3710            
      258.3095                  345.3806                  425.8914            
      446.6402                  470.7412                  581.9767            
      665.6133                  750.0642                  868.5386            
      930.9654                  944.1562                  984.0003            
     1021.3281                 1065.7209                 1080.7316            
     1155.5223                 1207.5550                 1260.3485            
     1273.2681                 1283.4913                 1320.2074            
     1368.5899                 1434.2763                 1481.3443            
     1490.0791                 1559.9629                 3068.6534            
     3091.3822                 3132.4485                 3147.5517            
     3178.7540                 3223.6184                 3862.1701            
Zero-point correction (Hartree): 0.111151


#################################################################################
E-HOCH=C(CH3)CH2CH2OO ring closure and H-shift
#################################################################################

HOCHCCH3CH2CH2OO.Ecppc
~~~~~~~~~~~~~~~~~~~~~~
E(UM062X/Aug-CC-pVTZ) (Hartree): -421.45033361 
Electronic state : 2-A
Cartesian coordinates (Angs):
     C      -1.103065     -0.871471       0.191141
     C      -0.923169      0.437989       0.049117
     C       0.395924      1.105234       0.334463
     C       1.491277      0.242106       0.917800
     O       1.954620     -0.751298      -0.027162
     O       2.592063     -0.202878      -1.014324
     O      -2.250252     -1.571520      -0.021246
     H      -0.307885     -1.538884       0.491128
     C      -1.996493      1.381879      -0.412544
     H       0.784451      1.565845      -0.579038
     H       0.231319      1.930178       1.035728
     H       2.356948      0.841506       1.192988
     H       1.153244     -0.338338       1.774789
     H      -2.959546     -0.976412      -0.277049
     H      -2.282302      2.070261       0.386228
     H      -2.903590      0.887905      -0.759677
     H      -1.630930      1.989086      -1.243099
Rotational constants (GHz):    3.2229900    1.1959300    1.0071900
Vibrational harmonic frequencies (cm-1):
       51.8982                   69.8197                   73.8428            
      147.1759                  217.6721                  261.0593            
      300.7799                  325.5790                  340.9710            
      477.0424                  492.8291                  545.1056            
      613.4975                  792.7749                  844.9085            
      922.6439                  972.1016                  990.6421            
     1022.9268                 1055.5205                 1118.1250            
     1179.2911                 1217.1855                 1231.9348            
     1277.5549                 1296.8105                 1317.5123            
     1396.5873                 1402.2311                 1423.3292            
     1438.1956                 1472.3417                 1478.9286            
     1496.0521                 1505.6938                 1781.0266            
     3038.5655                 3048.2013                 3068.5338            
     3098.9307                 3100.1948                 3124.0822            
     3154.6785                 3232.9326                 3881.6709            
Zero-point correction (Hartree): 0.139650

HOCHCCH3CH2CH2OO.Ecppt
~~~~~~~~~~~~~~~~~~~~~~
E(UM062X/Aug-CC-pVTZ) (Hartree): -421.45049488 
Electronic state : 2-A
Cartesian coordinates (Angs):
     C      -1.104756     -0.841832       0.194140
     C      -0.917761      0.462519       0.041328
     C       0.404086      1.129509       0.303331
     C       1.497118      0.278838       0.908852
     O       1.943860     -0.756505       0.000620
     O       2.585868     -0.256450      -1.009129
     O      -2.321172     -1.428384      -0.034035
     H      -0.313292     -1.514921       0.498488
     C      -2.014262      1.373580      -0.423936
     H       0.789235      1.563549      -0.624469
     H       0.244566      1.974288       0.981369
     H       2.371537      0.878173       1.155111
     H       1.158947     -0.265689       1.789342
     H      -2.238138     -2.380469       0.030156
     H      -2.237775      2.126436       0.335668
     H      -2.924844      0.823720      -0.643640
     H      -1.705234      1.909941      -1.323966
Rotational constants (GHz):    3.2608800    1.1933500    1.0065700
Vibrational harmonic frequencies (cm-1):
       64.2134                   69.7592                  128.4212            
      147.9245                  202.7073                  220.2890            
      280.1259                  304.5266                  309.7661            
      459.1385                  476.7862                  545.6244            
      617.3729                  804.5104                  838.1869            
      894.5427                  972.8820                  987.6513            
     1020.9739                 1061.4689                 1119.3137            
     1187.0261                 1200.6626                 1231.1333            
     1279.8442                 1304.1932                 1315.6101            
     1387.4788                 1398.6469                 1409.4114            
     1438.5514                 1469.9868                 1491.9479            
     1493.7130                 1495.7324                 1800.1772            
     3041.0298                 3049.1693                 3070.3455            
     3095.7183                 3097.7090                 3153.4042            
     3168.7181                 3202.3506                 3921.7865            
Zero-point correction (Hartree): 0.139493

HOCHCCH3CH2CH2OO.Ecptc
~~~~~~~~~~~~~~~~~~~~~~
E(UM062X/Aug-CC-pVTZ) (Hartree): -421.44964409 
Electronic state : 2-A
Cartesian coordinates (Angs):
     C       0.958460      0.920769       0.176224
     C       1.056457     -0.394701       0.011636
     C      -0.134754     -1.309029       0.129860
     C      -1.439234     -0.683554       0.559397
     O      -1.928124      0.141653      -0.523660
     O      -3.012965      0.767980      -0.188622
     O       1.964580      1.833701       0.114548
     H       0.017272      1.414141       0.372494
     C       2.341567     -1.103477      -0.306493
     H      -0.295534     -1.825626      -0.822258
     H       0.096126     -2.096372       0.854757
     H      -2.201540     -1.437712       0.748404
     H      -1.336795     -0.046262       1.437080
     H       2.803597      1.393954      -0.044874
     H       2.649076     -1.746589       0.521495
     H       3.173599     -0.436166      -0.529254
     H       2.211299     -1.746085      -1.179711
Rotational constants (GHz):    3.3065000    1.1620200    0.9115700
Vibrational harmonic frequencies (cm-1):
       39.4128                   52.5256                   72.1304            
      128.7292                  228.7058                  257.5636            
      290.8939                  323.7623                  338.1896            
      394.0621                  493.4623                  563.6174            
      607.2767                  795.5039                  831.6187            
      933.5204                  977.2514                 1009.9132            
     1030.1231                 1074.5935                 1109.3652            
     1180.0895                 1216.7749                 1236.2106            
     1283.9118                 1295.7526                 1302.1399            
     1391.7808                 1407.0620                 1424.9217            
     1441.9287                 1471.4976                 1479.7302            
     1505.3723                 1508.0329                 1781.5179            
     3035.6387                 3047.6372                 3061.6866            
     3090.1179                 3098.7149                 3125.4747            
     3142.3662                 3234.4097                 3881.7042            
Zero-point correction (Hartree): 0.139416

HOCHCCH3CH2CH2OO.Ecptt
~~~~~~~~~~~~~~~~~~~~~~
E(UM062X/Aug-CC-pVTZ) (Hartree): -421.45008565 
Electronic state : 2-A
Cartesian coordinates (Angs):
     C       0.949245      0.896312       0.173511
     C       1.049244     -0.416643       0.012924
     C      -0.135912     -1.337351       0.118120
     C      -1.445615     -0.719812       0.542801
     O      -1.925296      0.123323      -0.531726
     O      -2.955198      0.820810      -0.165589
     O       2.041054      1.717938       0.093176
     H       0.007111      1.392579       0.368978
     C       2.355536     -1.083852      -0.297378
     H      -0.284575     -1.849886      -0.838045
     H       0.095114     -2.126970       0.840052
     H      -2.210711     -1.475964       0.713060
     H      -1.351997     -0.094804       1.430111
     H       1.762803      2.632521       0.154340
     H       2.621025     -1.794855       0.488654
     H       3.160225     -0.360887      -0.395257
     H       2.281535     -1.650231      -1.228646
Rotational constants (GHz):    3.3040500    1.1760800    0.9184100
Vibrational harmonic frequencies (cm-1):
       39.1216                   64.6219                  128.1937            
      134.5810                  219.8758                  237.7368            
      275.3857                  299.8364                  306.6485            
      395.6929                  461.5607                  564.4930            
      611.0092                  806.0451                  825.4997            
      902.5628                  978.5088                 1008.2744            
     1030.0588                 1075.5645                 1111.3507            
     1188.2078                 1201.5821                 1235.4196            
     1286.3389                 1298.9974                 1305.7658            
     1387.2775                 1395.9645                 1413.2556            
     1443.2880                 1469.1613                 1493.2110            
     1494.0080                 1506.8397                 1800.8022            
     3038.4796                 3048.6987                 3064.8658            
     3089.6645                 3094.9998                 3142.0858            
     3168.8376                 3203.8529                 3920.8200            
Zero-point correction (Hartree): 0.139353

HOCHCCH3CH2CH2OO.Ectpc
~~~~~~~~~~~~~~~~~~~~~~
E(UM062X/Aug-CC-pVTZ) (Hartree): -421.45041178 
Electronic state : 2-A
Cartesian coordinates (Angs):
     C       1.572068     -0.848306      -0.035840
     C       1.048365      0.370431       0.058022
     C      -0.430853      0.592940       0.216823
     C      -1.275230     -0.662205       0.231476
     O      -2.664912     -0.314663       0.411511
     O      -3.163533      0.215424      -0.662995
     O       2.883973     -1.174345      -0.191749
     H       0.970192     -1.745366       0.005025
     C       1.858942      1.633757       0.008171
     H      -0.617029      1.146169       1.142711
     H      -0.792868      1.228042      -0.596810
     H      -1.198296     -1.223420      -0.698772
     H      -1.047709     -1.305710       1.079830
     H       3.418857     -0.378750      -0.252772
     H       2.936081      1.471320      -0.013281
     H       1.647700      2.253607       0.881680
     H       1.599093      2.223085      -0.873668
Rotational constants (GHz):    4.4348700    0.9033900    0.7892900
Vibrational harmonic frequencies (cm-1):
       53.6282                   69.9208                   88.4423            
      135.7319                  170.3219                  257.5520            
      290.1776                  336.9574                  353.7257            
      404.0617                  491.8700                  547.3106            
      647.4542                  792.2281                  844.8403            
      918.2831                  977.5671                 1004.5079            
     1035.6693                 1091.3277                 1117.8562            
     1178.3510                 1218.5345                 1240.8101            
     1279.3550                 1293.0455                 1329.7371            
     1349.0943                 1410.2839                 1426.3496            
     1442.5403                 1479.1171                 1490.3443            
     1503.1670                 1506.4381                 1778.2516            
     3040.4836                 3052.2854                 3075.5687            
     3093.2477                 3105.0726                 3127.5160            
     3154.5866                 3227.0072                 3881.4336            
Zero-point correction (Hartree): 0.139679

HOCHCCH3CH2CH2OO.Ectpt
~~~~~~~~~~~~~~~~~~~~~~
E(UM062X/Aug-CC-pVTZ) (Hartree): -421.45000645 
Electronic state : 2-A
Cartesian coordinates (Angs):
     C       1.577852     -0.819250      -0.040591
     C       1.039649      0.390526       0.048849
     C      -0.439288      0.606583       0.202344
     C      -1.275694     -0.652926       0.243520
     O      -2.668115     -0.314816       0.420538
     O      -3.177044      0.179949      -0.665932
     O       2.928480     -1.001619      -0.177833
     H       0.988561     -1.727576      -0.009288
     C       1.873460      1.636055       0.003073
     H      -0.626141      1.177823       1.116948
     H      -0.803352      1.224427      -0.623312
     H      -1.197913     -1.231149      -0.676395
     H      -1.040261     -1.278141       1.103607
     H       3.126312     -1.936141      -0.247113
     H       2.928756      1.407436      -0.114273
     H       1.742175      2.216290       0.919033
     H       1.559429      2.272992      -0.826568
Rotational constants (GHz):    4.5430900    0.8957900    0.7869900
Vibrational harmonic frequencies (cm-1):
       66.1054                   81.8442                  118.2333            
      133.7300                  168.4497                  211.6414            
      270.5425                  300.3762                  340.0182            
      401.4638                  463.2389                  548.0668            
      655.0680                  787.2887                  856.5622            
      882.6100                  976.6554                 1004.0975            
     1038.8936                 1090.5760                 1119.9076            
     1183.3872                 1200.1907                 1240.4372            
     1284.8237                 1297.3005                 1328.9850            
     1344.8630                 1391.9456                 1417.1383            
     1441.1149                 1486.2883                 1493.8206            
     1495.3588                 1502.2354                 1796.0394            
     3042.9124                 3052.9699                 3078.1945            
     3090.6331                 3100.8132                 3151.6730            
     3170.4785                 3193.7375                 3923.0461            
Zero-point correction (Hartree): 0.139478

HOCHCCH3CH2CH2OO.Ecttc
~~~~~~~~~~~~~~~~~~~~~~
E(UM062X/Aug-CC-pVTZ) (Hartree): -421.44977810 
Electronic state : 2-A
Cartesian coordinates (Angs):
     C       1.488099     -0.916064      -0.005446
     C       1.157250      0.372000      -0.004153
     C      -0.277382      0.825472      -0.006417
     C      -1.301472     -0.284018       0.000130
     O      -2.599710      0.348790       0.000616
     O      -3.555657     -0.527145       0.004487
     O       2.740169     -1.447403       0.002084
     H       0.750225     -1.706120      -0.013362
     C       2.156681      1.492604       0.004339
     H      -0.453841      1.465276       0.863764
     H      -0.454740      1.456607      -0.882589
     H      -1.248142     -0.912948      -0.888009
     H      -1.243594     -0.906166       0.892763
     H       3.398381     -0.748000       0.022418
     H       3.194147      1.164942      -0.051675
     H       2.053967      2.092384       0.911142
     H       1.986132      2.160124      -0.842661
Rotational constants (GHz):    4.5196000    0.8584100    0.7311900
Vibrational harmonic frequencies (cm-1):
       39.9873                   66.4798                  104.0525            
      118.0175                  126.4742                  258.2234            
      277.4712                  336.0857                  345.7019            
      356.7540                  491.5233                  552.7374            
      628.5252                  781.4722                  838.9029            
      916.1860                 1004.7024                 1027.4762            
     1032.3684                 1102.6472                 1113.7519            
     1180.2951                 1219.2221                 1231.7335            
     1285.5998                 1297.2377                 1310.4639            
     1346.4920                 1411.7788                 1429.2141            
     1447.0180                 1479.5478                 1495.7512            
     1506.2214                 1512.9631                 1778.6707            
     3041.0038                 3052.2032                 3069.5630            
     3084.7357                 3103.9782                 3128.5020            
     3142.6828                 3227.4756                 3881.6338            
Zero-point correction (Hartree): 0.139386

HOCHCCH3CH2CH2OO.Ecttt
~~~~~~~~~~~~~~~~~~~~~~
E(UM062X/Aug-CC-pVTZ) (Hartree): -421.44960190 
Electronic state : 2-A
Cartesian coordinates (Angs):
     C       1.497402     -0.887783       0.000047
     C       1.149149      0.392873      -0.000195
     C      -0.286555      0.836909      -0.000243
     C      -1.302947     -0.279254       0.000509
     O      -2.608087      0.338922       0.000809
     O      -3.554154     -0.547667      -0.000566
     O       2.808980     -1.279956       0.000127
     H       0.772529     -1.692773       0.000239
     C       2.167038      1.493856      -0.000459
     H      -0.464979      1.472336       0.872425
     H      -0.465223      1.471424      -0.873521
     H      -1.242267     -0.904675      -0.889847
     H      -1.241502     -0.903978       0.891323
     H       2.863827     -2.236095       0.000007
     H       3.180058      1.102198      -0.000860
     H       2.039886      2.130695       0.877666
     H       2.039237      2.130865      -0.878364
Rotational constants (GHz):    4.6297500    0.8525500    0.7297200
Vibrational harmonic frequencies (cm-1):
       61.1190                   98.7035                  106.0269            
      120.7515                  124.9046                  216.6812            
      263.0903                  301.9858                  333.7557            
      352.6867                  461.9462                  551.4865            
      637.3932                  777.7230                  851.1881            
      881.7542                 1005.5986                 1027.6191            
     1032.6477                 1105.6258                 1112.9235            
     1188.1821                 1201.6842                 1231.4127            
     1295.4491                 1297.7054                 1308.7258            
     1343.6335                 1393.4035                 1420.2363            
     1446.5771                 1489.3928                 1494.3233            
     1498.0086                 1512.2925                 1796.4653            
     3043.6363                 3052.7079                 3072.4169            
     3082.2130                 3100.2050                 3139.7630            
     3170.4924                 3194.7409                 3923.5816            
Zero-point correction (Hartree): 0.139248

HOCHCCH3CH2CH2OO.Egmpc
~~~~~~~~~~~~~~~~~~~~~~
E(UM062X/Aug-CC-pVTZ) (Hartree): -421.45079312 
Electronic state : 2-A
Cartesian coordinates (Angs):
     C      -1.828722      0.593462      -0.318153
     C      -0.749123      0.228923       0.366273
     C       0.356813      1.221157       0.592489
     C       1.588782      1.000573      -0.274274
     O       2.226603     -0.254941       0.045546
     O       1.867639     -1.208950      -0.758884
     O      -2.888998     -0.203964      -0.611804
     H      -1.967069      1.592998      -0.708991
     C      -0.625813     -1.165153       0.928019
     H       0.001192      2.230566       0.374814
     H       0.665992      1.211051       1.640907
     H       1.340216      0.972306      -1.333044
     H       2.348091      1.756234      -0.075769
     H      -2.717138     -1.099473      -0.304838
     H      -0.474526     -1.911017       0.144251
     H      -1.516950     -1.442277       1.497998
     H       0.226614     -1.241311       1.599681
Rotational constants (GHz):    3.5834100    1.2111900    1.0713800
Vibrational harmonic frequencies (cm-1):
       39.9458                   73.1485                  128.2640            
      167.4782                  175.8704                  263.8396            
      308.0215                  339.6564                  396.1107            
      471.1996                  520.2774                  540.9332            
      609.5298                  795.0616                  861.5924            
      923.9655                  937.1037                 1016.3156            
     1031.4899                 1050.5768                 1093.6730            
     1179.3530                 1227.8926                 1241.8213            
     1251.0525                 1320.3644                 1328.3232            
     1378.4174                 1391.6522                 1405.0569            
     1421.3944                 1470.4582                 1481.4939            
     1496.5170                 1502.0666                 1765.0900            
     3040.3305                 3053.9698                 3088.4239            
     3093.0150                 3102.2243                 3146.0031            
     3158.5547                 3212.6987                 3861.4501            
Zero-point correction (Hartree): 0.139792

HOCHCCH3CH2CH2OO.Elmmc
~~~~~~~~~~~~~~~~~~~~~~
E(UM062X/Aug-CC-pVTZ) (Hartree): -421.45242156 
Electronic state : 2-A
Cartesian coordinates (Angs):
     C       2.013050     -0.583300       0.048600
     C       0.822405     -0.037761       0.280218
     C      -0.330897     -0.920787       0.665404
     C      -1.401168     -1.046745      -0.407538
     O      -2.022990      0.228051      -0.691483
     O      -2.717012      0.653555       0.318701
     O       3.144830      0.064818      -0.333535
     H       2.192013     -1.644901       0.158839
     C       0.576416      1.443144       0.170143
     H       0.025312     -1.930256       0.878572
     H      -0.813437     -0.547858       1.572093
     H      -0.979016     -1.352464      -1.363281
     H      -2.195381     -1.728309      -0.105657
     H       2.954627      0.995628      -0.481461
     H       0.217636      1.728786      -0.820826
     H       1.471402      2.028463       0.390908
     H      -0.190622      1.752218       0.880397
Rotational constants (GHz):    4.6129000    1.0605600    0.9487100
Vibrational harmonic frequencies (cm-1):
       38.6505                   77.3705                  130.5209            
      169.8811                  176.6163                  264.7294            
      311.8036                  328.6012                  402.1490            
      459.2398                  517.9373                  551.3201            
      617.6214                  797.0893                  847.4594            
      928.4938                  943.3898                  996.1643            
     1036.3604                 1052.8646                 1106.3434            
     1176.3255                 1219.7146                 1234.3742            
     1269.0028                 1305.5852                 1318.0439            
     1378.3035                 1395.9793                 1409.7986            
     1426.5379                 1469.6655                 1485.0410            
     1489.3419                 1505.1048                 1769.2464            
     3047.6348                 3061.1003                 3088.9961            
     3104.5789                 3110.0293                 3124.2378            
     3153.5715                 3211.4230                 3868.8059            
Zero-point correction (Hartree): 0.139827

HOCHCCH3CH2CH2OO.Elmmt
~~~~~~~~~~~~~~~~~~~~~~
E(UM062X/Aug-CC-pVTZ) (Hartree): -421.45107126 
Electronic state : 2-A
Cartesian coordinates (Angs):
     C      -2.045545     -0.556310      -0.080610
     C      -0.840502     -0.020493      -0.231501
     C       0.320886     -0.905756      -0.581414
     C       1.398805     -0.977272       0.489546
     O       2.113025      0.274231       0.616461
     O       2.827360      0.521781      -0.437538
     O      -3.140708      0.192148       0.252576
     H      -2.218904     -1.618909      -0.211558
     C      -0.596830      1.451270      -0.071279
     H      -0.024704     -1.925997      -0.758613
     H       0.802291     -0.563348      -1.501394
     H       0.977864     -1.144065       1.479792
     H       2.140528     -1.740460       0.258152
     H      -3.929223     -0.350927       0.223254
     H      -0.062021      1.665449       0.855983
     H      -1.533593      2.002421      -0.061156
     H       0.029452      1.821923      -0.884911
Rotational constants (GHz):    4.9357000    1.0140300    0.9163200
Vibrational harmonic frequencies (cm-1):
       36.7960                   71.9341                  147.3537            
      166.4145                  200.7384                  220.6476            
      267.5188                  297.9678                  374.2763            
      433.4844                  506.7578                  553.2612            
      611.9254                  806.4659                  851.1981            
      888.6263                  946.0686                  989.6621            
     1041.5967                 1058.7229                 1110.1534            
     1180.1000                 1210.4322                 1229.0814            
     1272.1106                 1305.5993                 1308.5329            
     1380.5998                 1394.8994                 1397.4725            
     1430.8916                 1468.7159                 1487.8996            
     1493.0969                 1493.7255                 1791.2177            
     3056.7129                 3057.7261                 3087.8331            
     3106.6378                 3107.8842                 3152.1624            
     3161.8569                 3175.6031                 3920.5807            
Zero-point correction (Hartree): 0.139544

HOCHCCH3CH2CH2OO.Elmtc
~~~~~~~~~~~~~~~~~~~~~~
E(UM062X/Aug-CC-pVTZ) (Hartree): -421.45103902 
Electronic state : 2-A
Cartesian coordinates (Angs):
     C       2.057130     -0.569428      -0.201725
     C       0.932723     -0.082448       0.315439
     C      -0.172671     -1.032065       0.687609
     C      -1.412079     -0.918236      -0.180575
     O      -2.063491      0.337284       0.123070
     O      -3.099629      0.531724      -0.632015
     O       3.138556      0.138524      -0.620488
     H       2.215710     -1.631877      -0.333222
     C       0.710421      1.388304       0.540609
     H       0.181427     -2.060750       0.604398
     H      -0.471987     -0.880858       1.728956
     H      -1.171835     -0.910268      -1.243110
     H      -2.133812     -1.706963       0.029789
     H       2.960188      1.080858      -0.554230
     H       0.152950      1.849424      -0.276981
     H       1.646002      1.936518       0.665775
     H       0.124727      1.546901       1.445953
Rotational constants (GHz):    4.5600900    0.9613500    0.8826200
Vibrational harmonic frequencies (cm-1):
       33.2861                   60.1466                   98.9528            
      149.4043                  179.0129                  256.2755            
      302.3820                  334.3240                  390.1704            
      410.9641                  501.4042                  575.1685            
      600.9007                  797.4821                  840.6084            
      925.9919                  961.2699                 1025.1453            
     1044.0113                 1059.1274                 1093.6388            
     1180.0190                 1218.9880                 1237.1159            
     1276.0249                 1295.5166                 1318.5902            
     1380.5161                 1398.0782                 1412.0442            
     1428.2151                 1467.6952                 1485.1955            
     1498.0731                 1503.1657                 1769.5168            
     3049.7919                 3050.6693                 3082.3847            
     3107.0257                 3108.5436                 3125.5393            
     3142.4746                 3209.4681                 3871.6575            
Zero-point correction (Hartree): 0.139551

HOCHCCH3CH2CH2OO.Elmtt
~~~~~~~~~~~~~~~~~~~~~~
E(UM062X/Aug-CC-pVTZ) (Hartree): -421.44993064 
Electronic state : 2-A
Cartesian coordinates (Angs):
     C      -2.102942      0.538206      -0.143436
     C      -0.937721      0.060986       0.276054
     C       0.166425      1.019365       0.624421
     C       1.406567      0.886346      -0.241243
     O       2.135432     -0.287980       0.187571
     O       3.181418     -0.493893      -0.550088
     O      -3.144905     -0.277302      -0.488645
     H      -2.283931      1.603643      -0.234672
     C      -0.681508     -1.410118       0.417318
     H      -0.189171      2.046483       0.528509
     H       0.472598      0.885162       1.666565
     H       1.166525      0.752649      -1.295559
     H       2.081468      1.733116      -0.121316
     H      -3.916446      0.249339      -0.700408
     H       0.027256     -1.761330      -0.335032
     H      -1.602277     -1.977775       0.312444
     H      -0.236502     -1.626603       1.390083
Rotational constants (GHz):    4.9541800    0.9345000    0.8533500
Vibrational harmonic frequencies (cm-1):
       38.2223                   60.7487                  118.7998            
      167.5998                  208.7623                  239.9630            
      253.9018                  295.9806                  369.6034            
      380.9865                  471.5233                  579.6108            
      597.9815                  807.2849                  841.7321            
      891.1782                  958.9019                 1021.9535            
     1049.8199                 1064.5119                 1098.2331            
     1185.8944                 1209.9780                 1231.6886            
     1279.2776                 1296.1262                 1305.4640            
     1382.0083                 1397.4037                 1398.7941            
     1432.0567                 1465.6511                 1490.4287            
     1496.2937                 1500.0287                 1794.8727            
     3047.2310                 3058.8339                 3081.9629            
     3106.0061                 3109.1757                 3141.2796            
     3163.4507                 3177.9344                 3921.3390            
Zero-point correction (Hartree): 0.139402

HOCHCCH3CH2CH2OO.Elpmc
~~~~~~~~~~~~~~~~~~~~~~
E(CCSD(T)/Aug-CC-pVTZ) (Hartree): -420.84408640 
E(CCSD/Aug-CC-pVTZ) (Hartree): -420.77348661 
     T1 diagnostic:  0.020724 
E(MP2/Aug-CC-pVTZ) (Hartree): -420.72102249 
E(MP3/Aug-CC-pVTZ) (Hartree): -420.76040125 
E(PMP2/Aug-CC-pVTZ) (Hartree): -420.72446597 
E(PMP3/Aug-CC-pVTZ) (Hartree): -420.76254263 
E(PUHF/Aug-CC-pVTZ) (Hartree): -419.18070042 
E(UHF/Aug-CC-pVTZ) (Hartree): -419.17544253 
E(UM062X/Aug-CC-pVTZ) (Hartree): -421.45265451 
Electronic state : 2-A
Cartesian coordinates (Angs):
     C      -1.517607     -0.283437      -0.753321
     C      -0.688102      0.550324      -0.133217
     C       0.538745      1.038517      -0.843823
     C       1.838957      0.611526      -0.173038
     O       1.985009     -0.818500      -0.218460
     O       1.354129     -1.396059       0.761167
     O      -2.645530     -0.839962      -0.241593
     H      -1.353689     -0.601333      -1.774347
     C      -0.894450      1.005527       1.283658
     H       0.547096      0.688579      -1.876849
     H       0.549588      2.133239      -0.871075
     H       2.704278      0.996970      -0.709256
     H       1.882456      0.910749       0.873250
     H      -2.716026     -0.636878       0.695306
     H      -0.360153      0.364472       1.988530
     H      -1.947769      1.023448       1.568417
     H      -0.519904      2.022190       1.415556
Rotational constants (GHz):    3.0806800    1.3277200    1.2131600
Vibrational harmonic frequencies (cm-1):
       63.9862                  104.7020                  108.6729            
      122.1413                  201.4260                  273.4201            
      300.7804                  361.7789                  395.4514            
      458.0915                  513.3197                  555.9277            
      598.5636                  800.0066                  863.5417            
      918.9867                  962.5085                 1003.3209            
     1035.1931                 1053.7956                 1078.6200            
     1184.2846                 1224.9307                 1237.2872            
     1246.1949                 1314.7995                 1323.2196            
     1372.5476                 1393.5532                 1406.8474            
     1425.4227                 1469.2816                 1484.0931            
     1495.6961                 1505.2614                 1772.5644            
     3040.6819                 3046.7273                 3093.4939            
     3107.1019                 3108.7996                 3113.8965            
     3154.7250                 3216.3431                 3873.0163            
Zero-point correction (Hartree): 0.139845

HOCHCCH3CH2CH2OO.Elpmt
~~~~~~~~~~~~~~~~~~~~~~
E(UM062X/Aug-CC-pVTZ) (Hartree): -421.45177275 
Electronic state : 2-A
Cartesian coordinates (Angs):
     C      -1.510210     -0.336826      -0.690902
     C      -0.683259      0.546226      -0.145920
     C       0.539959      0.977063      -0.898706
     C       1.847651      0.597746      -0.214740
     O       2.000095     -0.831905      -0.179810
     O       1.380285     -1.354796       0.837605
     O      -2.640887     -0.764850      -0.055396
     H      -1.323918     -0.761340      -1.671016
     C      -0.911633      1.122466       1.218494
     H       0.541037      0.556366      -1.905497
     H       0.548957      2.066978      -1.003651
     H       2.705532      0.954743      -0.781869
     H       1.899584      0.958318       0.811076
     H      -3.092511     -1.415167      -0.594411
     H      -0.205936      0.698501       1.936264
     H      -1.917224      0.908862       1.570994
     H      -0.766517      2.205095       1.209553
Rotational constants (GHz):    3.1009500    1.3187700    1.1980700
Vibrational harmonic frequencies (cm-1):
       57.1189                   93.4475                  104.6185            
      131.9094                  219.1160                  232.0021            
      276.1121                  311.2246                  387.5974            
      438.8327                  494.0006                  557.1893            
      600.1569                  807.2122                  858.7543            
      894.0112                  961.8466                  999.8902            
     1036.6439                 1062.5751                 1080.2574            
     1193.8357                 1210.0610                 1235.1229            
     1248.8211                 1303.8493                 1319.1174            
     1375.2739                 1390.0143                 1398.2793            
     1430.4524                 1469.6591                 1486.2454            
     1489.9780                 1504.9210                 1796.2725            
     3041.9251                 3050.8094                 3095.6879            
     3102.2293                 3104.9275                 3157.8622            
     3162.0273                 3180.0152                 3922.6773            
Zero-point correction (Hartree): 0.139594

HOCHCCH3CH2CH2OO.Elppc
~~~~~~~~~~~~~~~~~~~~~~
E(UM062X/Aug-CC-pVTZ) (Hartree): -421.45195093 
Electronic state : 2-A
Cartesian coordinates (Angs):
     C       1.459781     -0.776614       0.420568
     C       0.809440      0.376741       0.306445
     C      -0.482178      0.573410       1.045944
     C      -1.666117      0.819506       0.124995
     O      -1.850534     -0.277332      -0.795413
     O      -2.187652     -1.364440      -0.172854
     O       2.617064     -1.127776      -0.198308
     H       1.098108     -1.575173       1.054509
     C       1.280687      1.502085      -0.571500
     H      -0.703645     -0.293698       1.667310
     H      -0.414759      1.443134       1.707674
     H      -2.593160      0.935477       0.684486
     H      -1.513927      1.681988      -0.522449
     H       2.881434     -0.442781      -0.818407
     H       0.815043      1.470810      -1.560068
     H       2.362349      1.500720      -0.714819
     H       1.027859      2.465136      -0.124337
Rotational constants (GHz):    3.1403500    1.2648500    1.0636500
Vibrational harmonic frequencies (cm-1):
       36.8765                   52.5879                  118.8400            
      127.2007                  205.7481                  263.7766            
      302.9698                  348.2542                  391.2698            
      454.1732                  509.8571                  554.3828            
      615.8995                  799.6879                  843.0226            
      929.9481                  956.6517                  993.0827            
     1035.7560                 1052.2483                 1089.8522            
     1182.5724                 1223.8758                 1230.1082            
     1265.2094                 1299.6920                 1317.9795            
     1377.4525                 1396.8678                 1410.5049            
     1426.5641                 1472.3962                 1486.1949            
     1496.9209                 1505.0832                 1778.0527            
     3041.6380                 3043.2119                 3093.3491            
     3098.9139                 3114.6308                 3121.5831            
     3151.6504                 3215.2843                 3874.0553            
Zero-point correction (Hartree): 0.139665

HOCHCCH3CH2CH2OO.Elppt
~~~~~~~~~~~~~~~~~~~~~~
E(CCSD(T)/Aug-CC-pVTZ) (Hartree): -420.84385432 
E(CCSD/Aug-CC-pVTZ) (Hartree): -420.77372382 
     T1 diagnostic:  0.020573 
E(MP2/Aug-CC-pVTZ) (Hartree): -420.72095663 
E(MP3/Aug-CC-pVTZ) (Hartree): -420.76066693 
E(PMP2/Aug-CC-pVTZ) (Hartree): -420.72411407 
E(PMP3/Aug-CC-pVTZ) (Hartree): -420.76253098 
E(PUHF/Aug-CC-pVTZ) (Hartree): -419.18205719 
E(UHF/Aug-CC-pVTZ) (Hartree): -419.17690718 
E(UM062X/Aug-CC-pVTZ) (Hartree): -421.45188619 
Electronic state : 2-A
Cartesian coordinates (Angs):
     C       1.428909     -0.761649       0.387917
     C       0.808286      0.406145       0.287379
     C      -0.489208      0.617197       1.011743
     C      -1.672006      0.827860       0.080720
     O      -1.862434     -0.311367      -0.786966
     O      -2.193385     -1.369017      -0.113317
     O       2.607110     -1.019542      -0.254484
     H       1.022622     -1.570406       0.984909
     C       1.341535      1.528230      -0.552156
     H      -0.712932     -0.230656       1.658873
     H      -0.426996      1.506181       1.647335
     H      -2.598217      0.971458       0.635324
     H      -1.517559      1.658184      -0.605961
     H       2.895243     -1.912333      -0.060989
     H       0.735260      1.673752      -1.449666
     H       2.361263      1.329288      -0.871014
     H       1.325889      2.467235       0.005707
Rotational constants (GHz):    3.1486200    1.2674200    1.0540300
Vibrational harmonic frequencies (cm-1):
       26.7941                   45.7261                  108.2875            
      130.5170                  215.3615                  233.3374            
      275.5859                  299.0623                  385.1109            
      433.3619                  493.0776                  557.0090            
      615.4538                  807.4477                  840.0362            
      902.1129                  957.7869                  984.3953            
     1035.1859                 1063.0966                 1089.2179            
     1192.4548                 1208.3106                 1233.7179            
     1266.7916                 1301.9615                 1305.5584            
     1381.0377                 1389.3788                 1401.8280            
     1430.7164                 1471.4674                 1487.7331            
     1490.5883                 1502.7339                 1800.3064            
     3046.1368                 3048.2779                 3093.5697            
     3097.0945                 3117.7039                 3155.1559            
     3161.9043                 3180.8921                 3921.9245            
Zero-point correction (Hartree): 0.139390

HOCHCCH3CH2CH2OO.Elptc
~~~~~~~~~~~~~~~~~~~~~~
E(UM062X/Aug-CC-pVTZ) (Hartree): -421.45093535 
Electronic state : 2-A
Cartesian coordinates (Angs):
     C      -1.721411     -0.587870      -0.547802
     C      -0.916644      0.407847      -0.192202
     C       0.248419      0.773116      -1.068863
     C       1.585035      0.661313      -0.362510
     O       1.784646     -0.724568      -0.010541
     O       2.857524     -0.884493       0.700195
     O      -2.797669     -1.055815       0.136247
     H      -1.576378     -1.138501      -1.467638
     C      -1.090617      1.192064       1.078120
     H       0.263101      0.147565      -1.962174
     H       0.157778      1.811407      -1.403676
     H       2.415615      0.956359      -1.002489
     H       1.620835      1.237491       0.561719
     H      -2.868588     -0.611774       0.985637
     H      -0.462934      0.806120       1.885350
     H      -2.122091      1.195651       1.433353
     H      -0.812046      2.235865       0.922256
Rotational constants (GHz):    3.4451300    1.0522800    0.9883000
Vibrational harmonic frequencies (cm-1):
       41.6818                   55.6782                   95.2414            
      122.1272                  225.6290                  255.4193            
      298.1443                  341.1793                  386.6297            
      405.9443                  500.7129                  568.1586            
      599.1119                  800.1281                  838.2699            
      929.8089                  959.6360                 1024.2254            
     1049.3828                 1067.1277                 1077.5407            
     1181.2537                 1223.4907                 1231.4619            
     1276.1074                 1297.0730                 1318.4225            
     1380.2345                 1394.1162                 1412.8135            
     1428.6500                 1470.7367                 1488.4428            
     1503.7162                 1508.9518                 1777.2567            
     3043.4882                 3044.8136                 3085.8243            
     3100.1926                 3108.8349                 3116.2341            
     3140.7489                 3215.3730                 3874.7341            
Zero-point correction (Hartree): 0.139571

HOCHCCH3CH2CH2OO.Elptt
~~~~~~~~~~~~~~~~~~~~~~
E(UM062X/Aug-CC-pVTZ) (Hartree): -421.45062207 
Electronic state : 2-A
Cartesian coordinates (Angs):
     C       1.687998     -0.618795       0.492881
     C       0.915542      0.416456       0.192925
     C      -0.259700      0.749108       1.067999
     C      -1.591353      0.659142       0.349459
     O      -1.802077     -0.723348      -0.011109
     O      -2.887151     -0.874508      -0.704725
     O       2.769767     -0.965716      -0.266504
     H       1.492458     -1.242616       1.357736
     C       1.163201      1.278087      -1.009050
     H      -0.285528      0.095656       1.941473
     H      -0.170140      1.775429       1.437329
     H      -2.423692      0.956840       0.985921
     H      -1.613993      1.241844      -0.570464
     H       3.198522     -1.736052       0.107991
     H       2.139415      1.075352      -1.441349
     H       1.111298      2.335820      -0.741319
     H       0.413215      1.102318      -1.783897
Rotational constants (GHz):    3.4577100    1.0502500    0.9739700
Vibrational harmonic frequencies (cm-1):
       27.8590                   56.3095                   95.1152            
      130.4504                  229.9982                  233.0775            
      279.8611                  281.8680                  379.0604            
      390.0224                  473.3075                  569.5506            
      599.1604                  808.7278                  835.2397            
      901.7905                  959.8911                 1022.4905            
     1052.1236                 1073.0370                 1076.6099            
     1189.3981                 1207.2794                 1234.9150            
     1275.3578                 1297.3689                 1306.2990            
     1383.6717                 1387.5146                 1402.9185            
     1432.2372                 1469.4858                 1490.7696            
     1493.0623                 1509.5911                 1800.9719            
     3046.6909                 3049.0555                 3088.0839            
     3097.1853                 3103.7458                 3144.0555            
     3161.8549                 3181.6663                 3920.9978            
Zero-point correction (Hartree): 0.139309

HOCHCCH3CH2CH2OO.Eltmc
~~~~~~~~~~~~~~~~~~~~~~
E(UM062X/Aug-CC-pVTZ) (Hartree): -421.45164869 
Electronic state : 2-A
Cartesian coordinates (Angs):
     C       1.811935     -0.907621       0.071422
     C       1.027333      0.151265       0.247118
     C      -0.414545     -0.040563       0.622740
     C      -1.339242      0.420047      -0.492300
     O      -2.719465      0.331750      -0.081247
     O      -3.113306     -0.903396      -0.014655
     O       3.119974     -0.898855      -0.294994
     H       1.454965     -1.917711       0.221781
     C       1.516665      1.562881       0.063181
     H      -0.625008     -1.089135       0.831386
     H      -0.651596      0.533489       1.523087
     H      -1.198815      1.472892      -0.733562
     H      -1.219188     -0.188641      -1.387452
     H       3.407718      0.001017      -0.472667
     H       1.385050      1.918785      -0.961790
     H       2.571892      1.675366       0.319359
     H       0.964490      2.241889       0.714062
Rotational constants (GHz):    4.7964600    0.8767900    0.7807500
Vibrational harmonic frequencies (cm-1):
       53.7285                   71.7147                   89.4977            
      116.3588                  155.1504                  271.1468            
      307.8924                  327.9762                  383.8881            
      406.1160                  510.9140                  539.2368            
      656.5248                  795.4961                  837.0464            
      933.8506                  968.3074                 1016.5065            
     1043.4275                 1069.7756                 1081.4272            
     1183.6477                 1220.7490                 1236.2731            
     1280.1390                 1307.8771                 1322.0944            
     1335.7953                 1400.0742                 1409.7012            
     1425.2233                 1482.0790                 1491.9171            
     1499.1111                 1505.3858                 1772.0821            
     3043.5621                 3050.7344                 3091.7159            
     3098.1917                 3117.5938                 3121.3765            
     3154.5905                 3218.4321                 3871.8645            
Zero-point correction (Hartree): 0.139597

HOCHCCH3CH2CH2OO.Eltmt
~~~~~~~~~~~~~~~~~~~~~~
E(UM062X/Aug-CC-pVTZ) (Hartree): -421.45146190 
Electronic state : 2-A
Cartesian coordinates (Angs):
     C       1.808449     -0.870946       0.073997
     C       1.022126      0.185896       0.234148
     C      -0.415721     -0.007658       0.623098
     C      -1.359154      0.443369      -0.480086
     O      -2.733501      0.297045      -0.063681
     O      -3.085753     -0.951642      -0.027514
     O       3.119356     -0.754994      -0.294526
     H       1.443150     -1.880050       0.228246
     C       1.518328      1.587994       0.035525
     H      -0.622997     -1.056074       0.837927
     H      -0.642754      0.569183       1.524220
     H      -1.258428      1.504409      -0.700972
     H      -1.223508     -0.143918      -1.387232
     H       3.537838     -1.616751      -0.290378
     H       1.112418      2.031524      -0.876723
     H       2.602370      1.614041      -0.037457
     H       1.206935      2.222439       0.868047
Rotational constants (GHz):    4.7876600    0.8777500    0.7801800
Vibrational harmonic frequencies (cm-1):
       56.3337                   61.5398                  111.1569            
      118.4974                  170.4625                  240.0409            
      267.4307                  321.2406                  359.2031            
      385.4776                  485.3416                  538.0905            
      660.2330                  793.0924                  844.5286            
      900.1542                  966.8000                 1014.9355            
     1050.6590                 1070.5620                 1086.7521            
     1194.8091                 1209.8170                 1236.0224            
     1283.4324                 1293.5699                 1325.9942            
     1339.2963                 1393.4718                 1406.7887            
     1430.5021                 1480.0410                 1492.3605            
     1497.0516                 1499.6333                 1795.6914            
     3049.6415                 3051.3162                 3094.9246            
     3099.0336                 3116.9742                 3159.8308            
     3162.0614                 3183.4444                 3918.9380            
Zero-point correction (Hartree): 0.139463

HOCHCCH3CH2CH2OO.Eltpc
~~~~~~~~~~~~~~~~~~~~~~
E(UM062X/Aug-CC-pVTZ) (Hartree): -421.45201182 
Electronic state : 2-A
Cartesian coordinates (Angs):
     C      -2.007490     -0.766543      -0.158771
     C      -1.003670      0.103506      -0.211088
     C       0.386922     -0.368660      -0.524399
     C       1.307083     -0.192810       0.672840
     O       2.663592     -0.544892       0.329885
     O       3.209099      0.359872      -0.424121
     O      -3.304263     -0.488022       0.135709
     H      -1.870260     -1.819530      -0.365650
     C      -1.199234      1.573372       0.052831
     H       0.380775     -1.418458      -0.818898
     H       0.807641      0.209533      -1.351093
     H       1.321144      0.836694       1.029090
     H       1.041753     -0.866617       1.485571
     H      -3.399346      0.442897       0.356862
     H      -1.153800      1.815574       1.117656
     H      -2.155303      1.937117      -0.329843
     H      -0.421692      2.153930      -0.443958
Rotational constants (GHz):    5.5881300    0.8426200    0.7822800
Vibrational harmonic frequencies (cm-1):
       53.0781                   68.9128                   92.6832            
      134.5309                  153.8551                  269.6361            
      308.6222                  336.0594                  387.3273            
      408.3134                  514.1855                  543.1282            
      658.1054                  792.9716                  836.2138            
      926.7746                  973.8020                 1018.9343            
     1043.2789                 1062.5763                 1082.5295            
     1183.7005                 1225.6114                 1233.7287            
     1283.3615                 1305.6221                 1327.7582            
     1335.9956                 1398.4848                 1407.9966            
     1424.1372                 1481.3396                 1492.3829            
     1498.2498                 1507.0122                 1770.7074            
     3041.9336                 3058.3081                 3092.2916            
     3095.3268                 3114.2838                 3122.0515            
     3156.0048                 3216.5067                 3868.2763            
Zero-point correction (Hartree): 0.139667

HOCHCCH3CH2CH2OO.Eltpt
~~~~~~~~~~~~~~~~~~~~~~
E(UM062X/Aug-CC-pVTZ) (Hartree): -421.45145415 
Electronic state : 2-A
Cartesian coordinates (Angs):
     C      -2.001604     -0.742327      -0.143488
     C      -1.003878      0.131352      -0.193096
     C       0.388943     -0.341258      -0.495733
     C       1.325429     -0.112698       0.679639
     O       2.660431     -0.553504       0.354349
     O       3.240376      0.263637      -0.470784
     O      -3.284177     -0.367272       0.143806
     H      -1.843266     -1.799209      -0.327038
     C      -1.215763      1.598121       0.043935
     H       0.390938     -1.403170      -0.745496
     H       0.796207      0.204117      -1.351080
     H       1.390356      0.938782       0.954426
     H       1.039528     -0.710211       1.543648
     H      -3.874869     -1.114517       0.041352
     H      -0.835668      1.906024       1.020700
     H      -2.271803      1.852258       0.004772
     H      -0.683224      2.183896      -0.707787
Rotational constants (GHz):    5.6476000    0.8348200    0.7774800
Vibrational harmonic frequencies (cm-1):
       49.7688                   62.1260                  111.8830            
      127.3880                  172.9634                  210.4648            
      261.2065                  320.6001                  362.4027            
      382.3184                  485.9407                  542.2492            
      657.6454                  793.1815                  842.6844            
      892.9237                  971.7160                 1015.6927            
     1050.5671                 1064.3973                 1088.9214            
     1195.4017                 1206.0764                 1235.3924            
     1278.4451                 1296.7273                 1326.6436            
     1338.9397                 1392.0899                 1404.1120            
     1429.8617                 1479.4113                 1492.5962            
     1497.1967                 1499.5171                 1794.2645            
     3052.0717                 3056.5095                 3095.4248            
     3101.9954                 3108.8201                 3158.4228            
     3161.4501                 3179.2350                 3920.3404            
Zero-point correction (Hartree): 0.139351

HOCHCCH3CH2CH2OO.Elttc
~~~~~~~~~~~~~~~~~~~~~~
E(UM062X/Aug-CC-pVTZ) (Hartree): -421.45091885 
Electronic state : 2-A
Cartesian coordinates (Angs):
     C       2.019457     -0.817672       0.008327
     C       1.098313      0.106194       0.263784
     C      -0.265828     -0.308594       0.739631
     C      -1.331637      0.046086      -0.278635
     O      -2.612365     -0.306310       0.287546
     O      -3.586183     -0.017001      -0.518699
     O       3.280374     -0.604705      -0.449534
     H       1.832634     -1.872400       0.160319
     C       1.352064      1.578443       0.081059
     H      -0.294439     -1.382104       0.927499
     H      -0.506575      0.195948       1.679682
     H      -1.359513      1.112952      -0.500090
     H      -1.213321     -0.513727      -1.205893
     H       3.413792      0.330153      -0.629580
     H       1.084613      1.925417      -0.920047
     H       2.395599      1.846085       0.257166
     H       0.758393      2.155065       0.791451
Rotational constants (GHz):    5.6123100    0.7832700    0.7367300
Vibrational harmonic frequencies (cm-1):
       53.8263                   72.5390                   95.9165            
      114.0774                  128.2612                  270.0024            
      279.2909                  331.3963                  381.0101            
      385.4593                  495.6250                  548.1192            
      637.7717                  787.1260                  832.2222            
      931.2207                 1006.1629                 1023.5025            
     1047.5933                 1065.7010                 1104.9684            
     1179.5446                 1217.2770                 1228.0802            
     1292.8911                 1306.1027                 1310.3396            
     1333.4085                 1402.8581                 1413.8348            
     1426.4010                 1485.5788                 1492.6064            
     1504.5213                 1508.5126                 1772.3846            
     3044.6967                 3051.5936                 3084.0365            
     3099.7247                 3110.5957                 3118.4691            
     3143.5100                 3214.7052                 3871.4970            
Zero-point correction (Hartree): 0.139435

HOCHCCH3CH2CH2OO.Elttt
~~~~~~~~~~~~~~~~~~~~~~
E(UM062X/Aug-CC-pVTZ) (Hartree): -421.45055503 
Electronic state : 2-A
Cartesian coordinates (Angs):
     C       2.019747     -0.786239       0.012765
     C       1.092870      0.133198       0.249446
     C      -0.268522     -0.285052       0.729399
     C      -1.347484      0.078620      -0.271565
     O      -2.613552     -0.338726       0.285451
     O      -3.600278     -0.055760      -0.507019
     O       3.268503     -0.461379      -0.437772
     H       1.826796     -1.842387       0.164177
     C       1.353458      1.598099       0.055223
     H      -0.298640     -1.360915       0.906120
     H      -0.498650      0.209545       1.677373
     H      -1.411543      1.151424      -0.448613
     H      -1.217059     -0.439965      -1.220983
     H       3.818674     -1.244931      -0.472194
     H       0.843713      1.981548      -0.831597
     H       2.415948      1.794482      -0.062124
     H       0.982964      2.166359       0.910953
Rotational constants (GHz):    5.7031700    0.7796800    0.7330400
Vibrational harmonic frequencies (cm-1):
       49.4497                   85.7927                   94.1556            
      109.3073                  155.9037                  223.1140            
      264.6973                  296.5680                  353.0401            
      371.2835                  465.2999                  545.6444            
      640.9286                  785.9895                  840.5879            
      895.2056                 1002.6418                 1021.9917            
     1055.0963                 1069.6735                 1106.7878            
     1189.2775                 1208.1309                 1226.7501            
     1292.2113                 1296.0405                 1310.2441            
     1338.0122                 1392.7459                 1413.1792            
     1430.7267                 1482.9877                 1493.2188            
     1498.6237                 1508.4037                 1795.6003            
     3050.3658                 3052.0386                 3087.7339            
     3100.1541                 3106.2284                 3147.3929            
     3162.0558                 3180.1953                 3919.4495            
Zero-point correction (Hartree): 0.139230


TS.HOCHCCH3CH2CH2OO.cycHOCHCCH3CH2CH2OO.Ec
~~~~~~~~~~~~~~~~~~~~~~~~~~~~~~~~~~~~~~~~~~
E(CCSD(T)/Aug-CC-pVTZ) (Hartree): -420.82495066 
E(CCSD/Aug-CC-pVTZ) (Hartree): -420.74993036 
     T1 diagnostic:  0.027178 
E(MP2/Aug-CC-pVTZ) (Hartree): -420.69194733 
E(MP3/Aug-CC-pVTZ) (Hartree): -420.73018644 
E(PMP2/Aug-CC-pVTZ) (Hartree): -420.70966304 
E(PMP3/Aug-CC-pVTZ) (Hartree): -420.74344876 
E(PUHF/Aug-CC-pVTZ) (Hartree): -419.15893222 
E(UHF/Aug-CC-pVTZ) (Hartree): -419.13843132 
E(UM062X/Aug-CC-pVTZ) (Hartree): -421.43069294 
Electronic state : 2-A
Cartesian coordinates (Angs):
     C       0.897061     -0.546190       0.623516
     C       0.499806      0.751999       0.364265
     C      -0.899828      1.100331       0.734933
     C      -1.862983      0.349260      -0.214481
     O      -1.608941     -1.029261      -0.103469
     O      -0.379546     -1.295814      -0.660220
     O       2.063821     -1.066021       0.210856
     H       0.465226     -1.110783       1.437486
     C       1.222207      1.567402      -0.659583
     H      -1.133763      0.784748       1.752116
     H      -1.076472      2.173656       0.656888
     H      -2.901957      0.490788       0.082090
     H      -1.719342      0.671026      -1.248151
     H       2.398259     -0.574510      -0.546052
     H       1.015811      1.199817      -1.672535
     H       2.304179      1.548632      -0.511108
     H       0.907815      2.608579      -0.619976
Rotational constants (GHz):    2.9232700    1.9578100    1.4160100
Vibrational harmonic frequencies (cm-1):
     i584.5270                  104.0146                  131.1446            
      152.9753                  280.3153                  301.1201            
      328.3390                  384.9481                  405.1223            
      438.5013                  509.0466                  585.3565            
      622.4213                  804.3175                  876.8799            
      933.8620                  966.4459                  987.6532            
     1013.3413                 1029.7845                 1074.4238            
     1089.5739                 1180.5453                 1223.0220            
     1246.1206                 1264.0096                 1324.3687            
     1343.1694                 1375.3321                 1386.2243            
     1413.1340                 1480.3285                 1482.9774            
     1490.9019                 1502.0566                 1565.9389            
     3013.5153                 3063.7344                 3073.1651            
     3083.0540                 3122.8568                 3133.5583            
     3139.1511                 3225.4811                 3857.2312            
Zero-point correction (Hartree): 0.138990

TS.HOCHCCH3CH2CH2OO.cycHOCHCCH3CH2CH2OO.Et
~~~~~~~~~~~~~~~~~~~~~~~~~~~~~~~~~~~~~~~~~~
E(CCSD(T)/Aug-CC-pVTZ) (Hartree): -420.82644110 
E(CCSD/Aug-CC-pVTZ) (Hartree): -420.75168260 
     T1 diagnostic:  0.027377 
E(MP2/Aug-CC-pVTZ) (Hartree): -420.69320422 
E(MP3/Aug-CC-pVTZ) (Hartree): -420.73169845 
E(PMP2/Aug-CC-pVTZ) (Hartree): -420.71075959 
E(PMP3/Aug-CC-pVTZ) (Hartree): -420.74484390 
E(PUHF/Aug-CC-pVTZ) (Hartree): -419.16124987 
E(UHF/Aug-CC-pVTZ) (Hartree): -419.14094997 
E(UM062X/Aug-CC-pVTZ) (Hartree): -421.43224778 
Electronic state : 2-A
Cartesian coordinates (Angs):
     C       0.901440     -0.521479       0.586849
     C       0.502829      0.769096       0.333071
     C      -0.894366      1.109763       0.725147
     C      -1.864531      0.326386      -0.190794
     O      -1.591884     -1.049777      -0.073455
     O      -0.384427     -1.307941      -0.683039
     O       2.095071     -0.960328       0.136906
     H       0.439773     -1.087856       1.386068
     C       1.212414      1.628625      -0.655606
     H      -1.109120      0.822969       1.754911
     H      -1.083272      2.178781       0.618222
     H      -2.898699      0.457600       0.126698
     H      -1.748306      0.635648      -1.231358
     H       2.156168     -1.910354       0.265310
     H       1.301757      2.650040      -0.281367
     H       0.641760      1.676875      -1.589447
     H       2.203139      1.246316      -0.884335
Rotational constants (GHz):    2.8787500    1.9716900    1.3999900
Vibrational harmonic frequencies (cm-1):
     i553.2027                  109.9272                  129.4570            
      161.2925                  272.9190                  293.9918            
      335.0045                  356.8991                  383.6058            
      430.7677                  499.5686                  584.3038            
      625.0749                  816.1024                  874.9959            
      937.0347                  964.9763                  987.8429            
     1010.4461                 1035.3106                 1075.9675            
     1087.1538                 1189.3977                 1224.8218            
     1245.0144                 1264.3001                 1303.5546            
     1334.5962                 1374.3540                 1390.3968            
     1422.9022                 1477.8849                 1482.0055            
     1488.2023                 1492.0330                 1602.7358            
     3031.4077                 3066.6412                 3072.5900            
     3092.3654                 3121.7575                 3134.3623            
     3168.0763                 3189.7552                 3887.1174            
Zero-point correction (Hartree): 0.139034


TS.HOCHCCH3CH2CH2OO.1-6Hshift.a.Ec
~~~~~~~~~~~~~~~~~~~~~~~~~~~~~~~~~~
E(CCSD(T)/Aug-CC-pVTZ) (Hartree): -420.80543099 
E(CCSD/Aug-CC-pVTZ) (Hartree): -420.73000039 
     T1 diagnostic:  0.024966 
E(MP2/Aug-CC-pVTZ) (Hartree): -420.67733307 
E(MP3/Aug-CC-pVTZ) (Hartree): -420.71333383 
E(PMP2/Aug-CC-pVTZ) (Hartree): -420.69231131 
E(PMP3/Aug-CC-pVTZ) (Hartree): -420.72403263 
E(PUHF/Aug-CC-pVTZ) (Hartree): -419.12957042 
E(UHF/Aug-CC-pVTZ) (Hartree): -419.11164555 
E(UM062X/Aug-CC-pVTZ) (Hartree): -421.41459562 
Electronic state : 2-A
Cartesian coordinates (Angs):
     O       1.611663     -1.284114      -0.619711
     H       0.570609     -1.436504       0.047100
     C      -0.397947     -1.100677       0.836472
     O       2.231586     -0.228477       0.005948
     C      -0.728993      0.240864       0.373594
     C       1.585033      0.992460      -0.352959
     C       0.358900      1.279457       0.506288
     H       0.156254     -1.138816       1.772511
     H      -1.154259     -1.878237       0.771877
     C      -1.881294      0.561876      -0.234616
     O      -2.930091     -0.252592      -0.482316
     H      -2.076507      1.567403      -0.583044
     H       2.343442      1.759914      -0.195592
     H       1.326531      0.944954      -1.412172
     H      -0.024832      2.261609       0.223290
     H       0.680104      1.342327       1.549750
     H      -2.740806     -1.145064      -0.177763
Rotational constants (GHz):    3.7713900    1.2756300    1.0917400
Vibrational harmonic frequencies (cm-1):
    i2187.2165                   79.1229                  145.5697            
      202.8478                  290.9588                  295.2709            
      344.0117                  403.4398                  455.9409            
      495.2855                  550.5102                  563.2053            
      629.2395                  656.4428                  815.4285            
      873.4114                  917.9509                  956.2470            
      990.7497                 1016.8466                 1060.0645            
     1081.7357                 1118.5491                 1190.0307            
     1204.8801                 1238.1535                 1253.3422            
     1299.2440                 1329.1686                 1375.6154            
     1396.7598                 1416.0353                 1465.7503            
     1478.7994                 1485.3532                 1530.7273            
     1702.6711                 3050.4029                 3069.6122            
     3098.1448                 3102.9731                 3128.3971            
     3176.8308                 3215.6662                 3865.5866            
Zero-point correction (Hartree): 0.134451

TS.HOCHCCH3CH2CH2OO.1-6Hshift.a.Et
~~~~~~~~~~~~~~~~~~~~~~~~~~~~~~~~~~
E(UM062X/Aug-CC-pVTZ) (Hartree): -421.41378992 
Electronic state : 2-A
Cartesian coordinates (Angs):
     O       1.601501     -1.290271      -0.618535
     H       0.561291     -1.438259       0.056889
     C      -0.401768     -1.097574       0.847814
     O       2.232270     -0.235626       0.001025
     C      -0.713173      0.247279       0.381248
     C       1.594707      0.986734      -0.362118
     C       0.371862      1.287446       0.498634
     H       0.154954     -1.145404       1.781839
     H      -1.189898     -1.835589       0.756039
     C      -1.868947      0.544929      -0.223165
     O      -2.847699     -0.382535      -0.401426
     H      -2.078130      1.543523      -0.589924
     H       2.358378      1.750500      -0.211240
     H       1.332110      0.935967      -1.420313
     H      -0.010168      2.268012       0.206377
     H       0.697337      1.359552       1.540003
     H      -3.610527      0.016269      -0.822647
Rotational constants (GHz):    3.7784100    1.2856200    1.0982000
Vibrational harmonic frequencies (cm-1):
    i2126.1464                   82.8438                  145.7752            
      213.6238                  269.8116                  277.2568            
      325.9406                  373.3494                  448.8572            
      472.1455                  554.2206                  568.7976            
      633.4221                  661.9724                  823.5970            
      875.3510                  878.8346                  957.0137            
     1001.7419                 1015.9198                 1062.1319            
     1082.5804                 1119.0508                 1198.9166            
     1199.9316                 1231.2216                 1252.2669            
     1295.3559                 1318.6255                 1377.5621            
     1397.1068                 1404.6352                 1462.3339            
     1478.6047                 1479.7281                 1516.7170            
     1730.1079                 3050.1858                 3067.5503            
     3099.5063                 3107.3536                 3126.1656            
     3182.5087                 3211.7110                 3914.6619            
Zero-point correction (Hartree): 0.134291

TS.HOCHCCH3CH2CH2OO.1-6Hshift.b.Ec
~~~~~~~~~~~~~~~~~~~~~~~~~~~~~~~~~~
E(UM062X/Aug-CC-pVTZ) (Hartree): -421.41342897 
Electronic state : 2-A
Cartesian coordinates (Angs):
     O      -1.809153      1.189157      -0.280637
     H      -0.693200      1.491482       0.191782
     C       0.459690      1.311138       0.776573
     O      -1.506597      0.067604      -1.009623
     C       0.653638     -0.107794       0.532762
     C      -1.543084     -1.075315      -0.157669
     C      -0.494299     -0.994585       0.960701
     H       0.164990      1.569807       1.791662
     H       1.170044      2.019741       0.358664
     C       1.682250     -0.631587      -0.156204
     O       2.736439      0.031551      -0.672135
     H       1.754807     -1.694854      -0.345186
     H      -2.553466     -1.197939       0.236613
     H      -1.317258     -1.896094      -0.838222
     H      -0.152773     -2.001917       1.198934
     H      -0.942200     -0.582073       1.864560
     H       2.654362      0.974213      -0.496627
Rotational constants (GHz):    3.3187200    1.4055600    1.2662400
Vibrational harmonic frequencies (cm-1):
    i2094.4757                   79.0026                  123.8287            
      232.6307                  277.1059                  301.8495            
      371.7860                  378.3727                  434.8235            
      486.2273                  537.4493                  568.2219            
      625.1325                  708.2326                  807.3081            
      858.3569                  921.8416                  954.5784            
     1018.9063                 1030.5444                 1058.5716            
     1082.5619                 1126.5080                 1200.3832            
     1219.9226                 1253.2084                 1266.0461            
     1287.5495                 1327.3345                 1364.0460            
     1396.2710                 1414.5928                 1482.8872            
     1488.3685                 1498.0181                 1501.1903            
     1689.9085                 3068.2305                 3082.1468            
     3098.4667                 3116.4651                 3135.8086            
     3174.3543                 3212.3579                 3857.4644            
Zero-point correction (Hartree): 0.134683

TS.HOCHCCH3CH2CH2OO.1-6Hshift.b.Et
~~~~~~~~~~~~~~~~~~~~~~~~~~~~~~~~~~
E(UM062X/Aug-CC-pVTZ) (Hartree): -421.41202505 
Electronic state : 2-A
Cartesian coordinates (Angs):
     O      -1.801016      1.194880      -0.292037
     H      -0.680972      1.494659       0.182105
     C       0.458122      1.309432       0.788425
     O      -1.505795      0.067479      -1.018020
     C       0.640213     -0.110418       0.546060
     C      -1.555137     -1.071067      -0.163841
     C      -0.505830     -1.004294       0.957098
     H       0.137967      1.569895       1.795354
     H       1.204489      1.976818       0.373802
     C       1.677405     -0.607886      -0.141367
     O       2.680110      0.183750      -0.600182
     H       1.766000     -1.668997      -0.347278
     H      -2.566519     -1.181391       0.231818
     H      -1.340686     -1.896938      -0.842239
     H      -0.165710     -2.015214       1.183006
     H      -0.955428     -0.603189       1.865159
     H       3.325829     -0.339119      -1.078065
Rotational constants (GHz):    3.3264600    1.4097200    1.2706800
Vibrational harmonic frequencies (cm-1):
    i2051.6284                   80.8964                  118.0649            
      234.7208                  253.7706                  296.7965            
      327.8990                  367.3283                  412.4711            
      463.3578                  542.0591                  565.4153            
      629.6163                  708.5276                  808.9682            
      856.5643                  886.7265                  954.9900            
     1018.2313                 1030.5736                 1064.8990            
     1082.5759                 1127.6163                 1207.4368            
     1210.8433                 1252.4923                 1264.9906            
     1289.6721                 1309.7406                 1357.9237            
     1397.5991                 1405.8849                 1478.3326            
     1482.6085                 1488.6295                 1499.8821            
     1716.0912                 3066.0063                 3080.8514            
     3108.1941                 3113.8368                 3133.5914            
     3180.4327                 3210.1388                 3913.5482            
Zero-point correction (Hartree): 0.134414


#################################################################################
Z-HOCH=C(CH3)CH2CH2OO ring closure and H-shift
#################################################################################

HOCHCCH3CH2CH2OO.Zcpmm
~~~~~~~~~~~~~~~~~~~~~~
E(UM062X/Aug-CC-pVTZ) (Hartree): -421.44926728 
Electronic state : 2-A
Cartesian coordinates (Angs):
     C       1.130828      1.189643       0.118372
     C       1.238603     -0.132009      -0.010035
     C       0.223458     -1.204350       0.298823
     C      -1.174937     -0.855596       0.776147
     O      -2.076071     -0.621963      -0.337399
     O      -1.939195      0.550472      -0.866455
     O       0.048799      1.933320       0.470619
     H       2.005167      1.806843      -0.055894
     C       2.555327     -0.707592      -0.455973
     H       0.121413     -1.869420      -0.565394
     H       0.663012     -1.830250       1.083227
     H      -1.627782     -1.712607       1.269338
     H      -1.213156      0.009725       1.433576
     H      -0.745437      1.559668       0.057560
     H       3.299289      0.071191      -0.610861
     H       2.443891     -1.258622      -1.393007
     H       2.945669     -1.411728       0.283331
Rotational constants (GHz):    2.8902200    1.5369100    1.1689500
Vibrational harmonic frequencies (cm-1):
       24.0365                   77.6570                  189.7251            
      198.5005                  212.4232                  301.1457            
      319.7088                  342.3071                  426.8330            
      433.3245                  555.5785                  612.1342            
      683.9066                  774.3618                  863.0769            
      915.0358                  972.8046                 1009.5127            
     1050.9749                 1071.7262                 1096.5676            
     1181.8355                 1220.7331                 1247.8945            
     1277.4254                 1332.8511                 1356.0380            
     1407.6980                 1409.2349                 1419.2418            
     1438.9876                 1461.5529                 1484.0105            
     1501.8632                 1507.0806                 1769.4280            
     3030.3042                 3041.7617                 3055.8862            
     3088.3897                 3111.8810                 3143.4802            
     3168.9225                 3179.4980                 3648.0915            
Zero-point correction (Hartree): 0.140370

HOCHCCH3CH2CH2OO.Zcppc
~~~~~~~~~~~~~~~~~~~~~~
E(UM062X/Aug-CC-pVTZ) (Hartree): -421.44991842 
Electronic state : 2-A
Cartesian coordinates (Angs):
     C       1.302368      1.134243      -0.052999
     C       1.292066     -0.197500      -0.038492
     C       0.113401     -1.112402       0.187562
     C      -1.101218     -0.564118       0.907252
     O      -1.906118      0.273034       0.035929
     O      -2.522093     -0.422441      -0.870935
     O       0.278841      2.017500       0.086638
     H       2.242014      1.657752      -0.178460
     C       2.581383     -0.932962      -0.282837
     H      -0.224491     -1.555842      -0.754835
     H       0.469624     -1.953295       0.789785
     H      -1.753771     -1.364950       1.247106
     H      -0.836395      0.090558       1.735721
     H      -0.571467      1.619975      -0.129949
     H       3.407289     -0.247262      -0.461502
     H       2.495186     -1.588545      -1.153039
     H       2.838972     -1.566692       0.569206
Rotational constants (GHz):    3.0876200    1.3938000    1.0892800
Vibrational harmonic frequencies (cm-1):
       41.4157                   88.8959                  158.4002            
      203.7030                  214.9268                  267.4457            
      306.5270                  349.4743                  426.3144            
      468.9643                  540.3332                  555.0457            
      616.7284                  783.5881                  848.6957            
      920.2684                  977.4469                 1010.4465            
     1023.8451                 1070.5587                 1118.5778            
     1177.7980                 1205.3420                 1226.1172            
     1285.3179                 1308.7509                 1328.8084            
     1396.5434                 1402.0385                 1419.5250            
     1434.5639                 1466.7983                 1484.7455            
     1489.9621                 1503.0773                 1770.8431            
     3041.0376                 3043.7765                 3071.5466            
     3088.6966                 3103.7687                 3142.8778            
     3164.1479                 3197.6601                 3816.3222            
Zero-point correction (Hartree): 0.140248

HOCHCCH3CH2CH2OO.Zcptt
~~~~~~~~~~~~~~~~~~~~~~
E(UM062X/Aug-CC-pVTZ) (Hartree): -421.44798473 
Electronic state : 2-A
Cartesian coordinates (Angs):
     C       1.111782      1.202708      -0.048985
     C       1.321607     -0.106468       0.000181
     C       0.372817     -1.143483       0.544186
     C      -1.082610     -0.764033       0.699462
     O      -1.584852     -0.416972      -0.610449
     O      -2.785048      0.066786      -0.547755
     O      -0.001108      1.821837       0.451410
     H       1.860828      1.861847      -0.473951
     C       2.623586     -0.662260      -0.501470
     H       0.429102     -2.020392      -0.107435
     H       0.730553     -1.483099       1.521683
     H      -1.670436     -1.612639       1.049149
     H      -1.242637      0.091413       1.346309
     H      -0.106376      2.684059       0.045726
     H       3.140249     -1.213026       0.288487
     H       3.289287      0.123328      -0.854380
     H       2.454407     -1.363486      -1.321472
Rotational constants (GHz):    3.1846200    1.3743500    1.1036000
Vibrational harmonic frequencies (cm-1):
       41.7350                   54.6761                  136.9906            
      196.3076                  224.8723                  256.5599            
      272.2639                  309.1968                  342.1811            
      389.1014                  449.4868                  541.9392            
      634.2976                  783.3691                  838.9369            
      888.2290                 1005.2984                 1008.2993            
     1044.5282                 1077.3965                 1102.6649            
     1177.8265                 1204.1175                 1242.1809            
     1276.9776                 1294.3337                 1304.8379            
     1384.4248                 1413.3817                 1421.5673            
     1433.4271                 1466.7757                 1483.4140            
     1500.1768                 1504.6908                 1800.8913            
     3040.9819                 3045.7174                 3070.2552            
     3094.2460                 3095.3060                 3140.4667            
     3175.4861                 3184.9905                 3907.3554            
Zero-point correction (Hartree): 0.139565

HOCHCCH3CH2CH2OO.Zctpc
~~~~~~~~~~~~~~~~~~~~~~
E(UM062X/Aug-CC-pVTZ) (Hartree): -421.44515262 
Electronic state : 2-A
Cartesian coordinates (Angs):
     C      -1.954737      0.702111      -0.066637
     C      -1.292319     -0.449834      -0.007600
     C       0.197765     -0.675928       0.038772
     C       1.099300      0.522071       0.262716
     O       2.448422      0.069257       0.503280
     O       3.004518     -0.353378      -0.590800
     O      -1.493168      1.984059      -0.122603
     H      -3.036633      0.701284      -0.068602
     C      -2.079754     -1.732002       0.012289
     H       0.399791     -1.381335       0.850752
     H       0.521164     -1.176700      -0.878264
     H       1.155607      1.183685      -0.603865
     H       0.836007      1.076985       1.162625
     H      -0.546872      2.014117      -0.268205
     H      -3.150674     -1.546910      -0.040197
     H      -1.874075     -2.301120       0.921577
     H      -1.804015     -2.368020      -0.832066
Rotational constants (GHz):    3.2170000    1.1150700    0.8728000
Vibrational harmonic frequencies (cm-1):
       25.4172                   78.3647                  123.7774            
      170.7876                  196.9246                  227.9818            
      287.8662                  320.1712                  343.9952            
      406.9443                  474.0316                  574.1455            
      604.6082                  791.2435                  883.9768            
      921.8576                  975.5759                 1005.4773            
     1051.2166                 1083.7976                 1123.9663            
     1173.5548                 1183.5992                 1246.7477            
     1278.9744                 1303.1522                 1346.0534            
     1355.9993                 1411.8816                 1419.2780            
     1434.4271                 1483.0102                 1487.6386            
     1504.0531                 1515.7753                 1779.0413            
     3042.4192                 3047.0036                 3065.3448            
     3076.6750                 3095.3128                 3140.2386            
     3146.0393                 3213.1117                 3925.5280            
Zero-point correction (Hartree): 0.139759

HOCHCCH3CH2CH2OO.Zctpt
~~~~~~~~~~~~~~~~~~~~~~
E(UM062X/Aug-CC-pVTZ) (Hartree): -421.44961874 
Electronic state : 2-A
Cartesian coordinates (Angs):
     C      -1.910461      0.687968      -0.132568
     C      -1.279218     -0.468402       0.020212
     C       0.193008     -0.658194       0.265105
     C       1.080153      0.569106       0.189292
     O       2.452055      0.165698       0.416055
     O       2.935128     -0.475134      -0.603425
     O      -1.293149      1.911294      -0.076811
     H      -2.980286      0.712591      -0.304352
     C      -2.063894     -1.748177      -0.033569
     H       0.327699     -1.125570       1.246155
     H       0.572150     -1.379256      -0.464639
     H       1.037631      1.055505      -0.781581
     H       0.876641      1.290249       0.974713
     H      -1.926284      2.602984      -0.272360
     H      -3.124880     -1.566021      -0.195353
     H      -1.952764     -2.308170       0.897707
     H      -1.699699     -2.390990      -0.837673
Rotational constants (GHz):    3.1892200    1.1588400    0.8959600
Vibrational harmonic frequencies (cm-1):
       34.7291                   89.3545                  133.3168            
      169.8388                  185.6689                  216.9190            
      265.2060                  311.7155                  345.4390            
      397.6089                  456.9792                  567.6594            
      604.5898                  790.8203                  878.8482            
      888.6487                  966.6599                 1004.5028            
     1046.3952                 1088.0718                 1117.8057            
     1174.1608                 1201.1280                 1238.9297            
     1268.2535                 1294.4717                 1332.8919            
     1353.3483                 1407.4306                 1422.2608            
     1431.8591                 1481.9638                 1483.7375            
     1493.8845                 1504.6745                 1803.5656            
     3037.9988                 3048.1738                 3074.2592            
     3098.3665                 3123.7778                 3140.1703            
     3183.9106                 3189.7624                 3920.7129            
Zero-point correction (Hartree): 0.139584

HOCHCCH3CH2CH2OO.Zgmmc
~~~~~~~~~~~~~~~~~~~~~~
E(UM062X/Aug-CC-pVTZ) (Hartree): -421.45072057 
Electronic state : 2-A
Cartesian coordinates (Angs):
     C       1.989804      0.208706      -0.313793
     C       0.826097      0.596713       0.196926
     C      -0.065618     -0.359934       0.947609
     C      -0.945036     -1.198469       0.032037
     O      -1.823393     -0.354934      -0.746128
     O      -2.718326      0.210818       0.003761
     O       2.543784     -1.034946      -0.234980
     H       2.629282      0.883352      -0.866545
     C       0.339780      2.005975       0.026131
     H       0.509180     -1.048789       1.575217
     H      -0.716760      0.191344       1.626975
     H      -0.361834     -1.730557      -0.718451
     H      -1.574360     -1.891379       0.589167
     H       2.003592     -1.606928       0.316729
     H      -0.624440      2.029662      -0.484220
     H       1.047187      2.600169      -0.550200
     H       0.201475      2.487689       0.996649
Rotational constants (GHz):    3.3559600    1.2984200    1.0556100
Vibrational harmonic frequencies (cm-1):
       40.9393                   66.7204                  142.3623            
      169.4739                  193.3883                  289.2887            
      302.5363                  332.5190                  387.9733            
      421.2621                  534.2735                  570.9138            
      613.4048                  790.2132                  848.8792            
      917.2383                  948.1353                 1009.7677            
     1031.0112                 1071.8344                 1097.2237            
     1177.1280                 1189.8680                 1239.8074            
     1266.6471                 1299.3519                 1313.3219            
     1364.8695                 1399.9540                 1410.5359            
     1423.9707                 1481.6530                 1488.0521            
     1493.7835                 1504.0293                 1772.4866            
     3041.5945                 3051.1800                 3087.2260            
     3106.0248                 3108.3076                 3140.4678            
     3149.7913                 3219.9452                 3871.8849            
Zero-point correction (Hartree): 0.139837

HOCHCCH3CH2CH2OO.Zgmmt
~~~~~~~~~~~~~~~~~~~~~~
E(UM062X/Aug-CC-pVTZ) (Hartree): -421.45252662 
Electronic state : 2-A
Cartesian coordinates (Angs):
     C       1.937512     -0.188903      -0.323205
     C       0.805674     -0.633427       0.203909
     C      -0.070602      0.296764       1.002205
     C      -0.912154      1.199539       0.117663
     O      -1.770587      0.420154      -0.748972
     O      -2.692514     -0.194761      -0.074327
     O       2.332130      1.115667      -0.158502
     H       2.592745     -0.818658      -0.913257
     C       0.345735     -2.044789       0.001752
     H      -0.736259     -0.273491       1.650451
     H       0.540127      0.946490       1.631171
     H      -1.556161      1.858637       0.698149
     H      -0.290957      1.773311      -0.566664
     H       3.207424      1.243071      -0.526465
     H       0.236027     -2.554879       0.961179
     H       1.048398     -2.611123      -0.608111
     H      -0.630563     -2.066941      -0.485989
Rotational constants (GHz):    3.2226000    1.3598600    1.0889800
Vibrational harmonic frequencies (cm-1):
       42.8964                   65.6193                  142.7389            
      167.1418                  189.3145                  227.3757            
      288.6729                  320.2290                  354.3743            
      391.2909                  531.7092                  574.5252            
      617.5566                  798.6739                  848.1971            
      878.3959                  950.0970                 1009.2751            
     1028.4883                 1072.7596                 1100.3847            
     1182.1118                 1197.7530                 1226.2701            
     1262.8379                 1299.1358                 1318.7714            
     1362.3503                 1390.7542                 1407.4201            
     1423.0941                 1474.4708                 1481.9141            
     1491.8754                 1503.0181                 1794.6668            
     3050.6164                 3075.4455                 3095.1329            
     3105.4278                 3124.1288                 3136.8179            
     3163.0238                 3188.8317                 3919.8657            
Zero-point correction (Hartree): 0.139596

HOCHCCH3CH2CH2OO.Zgmpc
~~~~~~~~~~~~~~~~~~~~~~
E(UM062X/Aug-CC-pVTZ) (Hartree): -421.44933493 
Electronic state : 2-A
Cartesian coordinates (Angs):
     C       1.782933      0.110969      -0.461481
     C       0.787914      0.564110       0.293452
     C      -0.004858     -0.353506       1.188551
     C      -1.119576     -1.100004       0.464262
     O      -2.097280     -0.166343      -0.034011
     O      -1.863617      0.176104      -1.265665
     O       2.230116     -1.173930      -0.541764
     H       2.351128      0.759979      -1.113582
     C       0.402348      2.013945       0.272419
     H       0.633315     -1.104711       1.666413
     H      -0.447622      0.220846       2.003959
     H      -0.752162     -1.663208      -0.392318
     H      -1.670244     -1.749300       1.143820
     H       1.742706     -1.737215       0.064959
     H       1.019339      2.575114      -0.427427
     H       0.518723      2.460585       1.262732
     H      -0.641492      2.138175      -0.020258
Rotational constants (GHz):    2.7294700    1.4523500    1.2564800
Vibrational harmonic frequencies (cm-1):
       48.7034                   88.8848                  105.7465            
      169.7326                  194.4482                  263.3324            
      294.1944                  342.2144                  378.2690            
      420.1903                  528.8116                  569.2579            
      604.0069                  779.9811                  872.6524            
      918.2761                  938.0512                 1019.9914            
     1036.1814                 1069.0318                 1087.0051            
     1177.5739                 1191.8773                 1236.3051            
     1258.3935                 1300.3856                 1329.8438            
     1370.3998                 1391.7892                 1410.7006            
     1423.2240                 1481.1253                 1483.1346            
     1491.9566                 1502.5607                 1774.5235            
     3036.0261                 3048.8346                 3086.6194            
     3098.1440                 3104.4574                 3141.0885            
     3151.2493                 3221.7205                 3877.9113            
Zero-point correction (Hartree): 0.139695

HOCHCCH3CH2CH2OO.Zgmpt
~~~~~~~~~~~~~~~~~~~~~~
E(UM062X/Aug-CC-pVTZ) (Hartree): -421.45143242 
Electronic state : 2-A
Cartesian coordinates (Angs):
     C       1.737121      0.063987      -0.456171
     C       0.779185      0.601911       0.284741
     C      -0.011417     -0.262962       1.230502
     C      -1.095726     -1.067273       0.528296
     O      -2.080353     -0.182475      -0.047689
     O      -1.816170      0.105465      -1.286838
     O       2.025882     -1.274731      -0.377320
     H       2.322426      0.642226      -1.160931
     C       0.431283      2.055253       0.184803
     H       0.645789     -0.982963       1.721704
     H      -0.471362      0.351282       2.006168
     H      -0.687958     -1.672298      -0.278096
     H      -1.653186     -1.683368       1.232423
     H       2.762741     -1.485878      -0.951833
     H       1.056551      2.565317      -0.546653
     H       0.559200      2.551269       1.149607
     H      -0.611754      2.182851      -0.110643
Rotational constants (GHz):    2.6594900    1.5166600    1.2947300
Vibrational harmonic frequencies (cm-1):
       45.6868                   87.5472                  103.4694            
      176.4799                  193.2789                  234.0679            
      281.1618                  330.6672                  348.3348            
      397.9300                  526.6332                  570.6983            
      607.3737                  787.0443                  870.6459            
      876.5100                  939.9320                 1016.1217            
     1035.2074                 1070.4997                 1088.9494            
     1183.0382                 1198.2857                 1234.1057            
     1242.8935                 1310.5007                 1325.2313            
     1366.3777                 1382.6238                 1408.4118            
     1421.3718                 1472.8623                 1481.4155            
     1485.9827                 1501.6823                 1796.0196            
     3048.6422                 3067.6456                 3095.2545            
     3103.2459                 3114.5449                 3137.1026            
     3164.9746                 3192.3371                 3920.0508            
Zero-point correction (Hartree): 0.139521

HOCHCCH3CH2CH2OO.Zgmtc
~~~~~~~~~~~~~~~~~~~~~~
E(UM062X/Aug-CC-pVTZ) (Hartree): -421.44965828 
Electronic state : 2-A
Cartesian coordinates (Angs):
     C       1.939070     -0.129593      -0.510460
     C       1.011908      0.552033       0.154141
     C       0.089828     -0.124896       1.137626
     C      -1.102311     -0.796531       0.478876
     O      -1.901160      0.241346      -0.129589
     O      -2.928763     -0.251629      -0.747865
     O       2.204870     -1.462661      -0.411107
     H       2.596994      0.343679      -1.226528
     C       0.832012      2.025207      -0.065783
     H       0.613282     -0.886342       1.724394
     H      -0.277367      0.604850       1.861275
     H      -0.805748     -1.479880      -0.317169
     H      -1.739491     -1.315071       1.194778
     H       1.645233     -1.868477       0.256231
     H      -0.181116      2.248067      -0.403871
     H       1.532750      2.401156      -0.809499
     H       0.992846      2.578250       0.862484
Rotational constants (GHz):    3.0103600    1.2180800    1.0238900
Vibrational harmonic frequencies (cm-1):
       41.4082                   75.5142                  119.9922            
      173.6373                  195.7565                  273.3382            
      284.5693                  314.9211                  381.6568            
      392.4674                  489.2844                  577.5848            
      622.5919                  786.1280                  841.5853            
      921.7769                  977.9475                 1025.9881            
     1049.6434                 1070.3287                 1087.9050            
     1176.7408                 1196.4185                 1244.8787            
     1276.7479                 1294.6012                 1306.7742            
     1367.8364                 1402.7677                 1410.5180            
     1422.6055                 1481.9338                 1491.9293            
     1499.3863                 1505.2994                 1775.1273            
     3043.9052                 3050.1255                 3078.3368            
     3098.5812                 3105.7877                 3137.3926            
     3141.1266                 3219.1818                 3876.0556            
Zero-point correction (Hartree): 0.139670

HOCHCCH3CH2CH2OO.Zgmtt
~~~~~~~~~~~~~~~~~~~~~~
E(UM062X/Aug-CC-pVTZ) (Hartree): -421.45153725 
Electronic state : 2-A
Cartesian coordinates (Angs):
     C       1.880460     -0.188728      -0.506354
     C       1.011983      0.572220       0.144584
     C       0.096187     -0.044062       1.170887
     C      -1.088956     -0.750130       0.542855
     O      -1.874325      0.247915      -0.150741
     O      -2.889016     -0.281038      -0.759924
     O       1.966358     -1.535761      -0.260800
     H       2.549319      0.206647      -1.261521
     C       0.889736      2.038765      -0.135028
     H       0.635776     -0.789604       1.756667
     H      -0.265876      0.721474       1.859021
     H      -0.775125     -1.488032      -0.193238
     H      -1.741217     -1.213280       1.282420
     H       2.681224     -1.918254      -0.771152
     H      -0.121915      2.284581      -0.462218
     H       1.588769      2.357583      -0.907021
     H       1.088445      2.621573       0.767096
Rotational constants (GHz):    2.9146800    1.2701200    1.0549900
Vibrational harmonic frequencies (cm-1):
       42.7504                   72.7486                  117.7732            
      178.3161                  198.3964                  245.1979            
      285.7025                  300.6185                  347.4777            
      375.8057                  479.9849                  582.0684            
      623.8398                  794.2295                  840.9293            
      877.0195                  983.2028                 1025.2759            
     1042.4252                 1075.1355                 1088.8214            
     1181.7763                 1199.4183                 1228.8308            
     1269.4839                 1298.6573                 1317.1769            
     1362.1365                 1396.8202                 1406.5667            
     1421.5974                 1473.6656                 1482.2938            
     1502.4534                 1505.0698                 1794.8735            
     3050.0418                 3071.5608                 3089.2414            
     3105.2245                 3118.0648                 3137.4365            
     3152.1171                 3190.2015                 3919.1491            
Zero-point correction (Hartree): 0.139541

HOCHCCH3CH2CH2OO.Zgpmc
~~~~~~~~~~~~~~~~~~~~~~
E(UM062X/Aug-CC-pVTZ) (Hartree): -421.45240759 
Electronic state : 2-A
Cartesian coordinates (Angs):
     C       1.224405      1.071636       0.115225
     C       1.093779     -0.235051      -0.098039
     C       0.100153     -0.780139      -1.085588
     C      -1.252678     -1.100586      -0.463721
     O      -1.846708      0.122595       0.018775
     O      -1.626316      0.305916       1.289588
     O       0.501693      2.068096      -0.462038
     H       1.972419      1.462813       0.792974
     C       1.914167     -1.228647       0.668231
     H      -0.054263     -0.084383      -1.913673
     H       0.486521     -1.704024      -1.522661
     H      -1.953299     -1.490637      -1.200553
     H      -1.174329     -1.775711       0.385619
     H      -0.359671      1.738532      -0.737933
     H       1.276658     -1.891783       1.259108
     H       2.597727     -0.732283       1.354866
     H       2.499926     -1.858654      -0.004990
Rotational constants (GHz):    2.4124700    1.7738900    1.3808600
Vibrational harmonic frequencies (cm-1):
       53.2250                   92.8312                  110.8594            
      190.7603                  202.6129                  259.5484            
      307.3685                  344.1491                  378.7662            
      437.9692                  526.9002                  582.3746            
      602.7792                  774.7668                  862.8993            
      918.0243                  979.9982                  993.6932            
     1030.2699                 1066.0743                 1084.6708            
     1184.8261                 1199.6995                 1224.5053            
     1269.9523                 1306.9516                 1323.5696            
     1366.7961                 1384.1554                 1411.7458            
     1422.4428                 1479.2083                 1487.6470            
     1488.9137                 1500.8396                 1764.8020            
     3040.9682                 3056.5544                 3088.9997            
     3091.9236                 3100.8731                 3138.8295            
     3159.6501                 3206.2195                 3848.4104            
Zero-point correction (Hartree): 0.139763

HOCHCCH3CH2CH2OO.Zgppc
~~~~~~~~~~~~~~~~~~~~~~
E(CCSD(T)/Aug-CC-pVTZ) (Hartree): -420.84631979 
E(CCSD/Aug-CC-pVTZ) (Hartree): -420.77536686 
     T1 diagnostic:  0.021002 
E(MP2/Aug-CC-pVTZ) (Hartree): -420.72348730 
E(MP3/Aug-CC-pVTZ) (Hartree): -420.76218978 
E(PMP2/Aug-CC-pVTZ) (Hartree): -420.72673939 
E(PMP3/Aug-CC-pVTZ) (Hartree): -420.76408756 
E(PUHF/Aug-CC-pVTZ) (Hartree): -419.18016550 
E(UHF/Aug-CC-pVTZ) (Hartree): -419.17484935 
E(UM062X/Aug-CC-pVTZ) (Hartree): -421.45480404 
Electronic state : 2-A
Cartesian coordinates (Angs):
     C      -1.212494      1.178878      -0.172259
     C      -1.161420     -0.120390       0.111263
     C      -0.063202     -0.717029       0.948967
     C       1.038780     -1.369346       0.134278
     O       1.696511     -0.421967      -0.746504
     O       2.167644      0.596960      -0.102567
     O      -0.325313      2.138965       0.186655
     H      -2.036973      1.595904      -0.737046
     C      -2.216824     -1.058983      -0.394807
     H       0.382627      0.021461       1.615150
     H      -0.480267     -1.497923       1.590496
     H       1.813810     -1.800446       0.767521
     H       0.656562     -2.124151      -0.549973
     H       0.523487      1.748654       0.428011
     H      -2.961550     -0.533786      -0.990435
     H      -2.729056     -1.555064       0.433194
     H      -1.788407     -1.845085      -1.022259
Rotational constants (GHz):    2.6040800    1.7509900    1.2063500
Vibrational harmonic frequencies (cm-1):
       44.7648                  126.1924                  134.7356            
      191.5450                  199.3966                  275.1822            
      313.8253                  352.8731                  395.9432            
      453.1138                  531.0890                  580.7217            
      633.5081                  769.4751                  848.0543            
      928.5450                  971.3108                  982.7232            
     1032.1058                 1072.3501                 1091.7482            
     1189.0619                 1205.0560                 1249.2238            
     1274.8693                 1304.4794                 1327.1191            
     1372.8944                 1403.2116                 1416.6370            
     1424.7850                 1480.5896                 1492.7890            
     1495.1440                 1502.5296                 1770.9465            
     3040.2241                 3062.2873                 3085.6176            
     3092.1114                 3115.3914                 3138.1233            
     3155.0114                 3201.6968                 3806.0569            
Zero-point correction (Hartree): 0.140187

HOCHCCH3CH2CH2OO.Zgppt
~~~~~~~~~~~~~~~~~~~~~~
E(UM062X/Aug-CC-pVTZ) (Hartree): -421.45053934 
Electronic state : 2-A
Cartesian coordinates (Angs):
     C      -1.451259      0.979163      -0.222332
     C      -1.140884     -0.268690       0.103488
     C       0.033012     -0.571021       0.992191
     C       1.204235     -1.175474       0.235921
     O       1.720483     -0.246319      -0.742162
     O       2.350518      0.735054      -0.172919
     O      -0.750905      2.051340       0.251475
     H      -2.292076      1.204611      -0.869038
     C      -1.948873     -1.422287      -0.410435
     H       0.381536      0.331125       1.491996
     H      -0.260136     -1.289196       1.763415
     H       2.025859     -1.431021       0.902989
     H       0.917013     -2.045772      -0.351916
     H      -1.030789      2.852096      -0.193360
     H      -2.767359     -1.083959      -1.044064
     H      -2.374184     -1.998170       0.415019
     H      -1.338005     -2.110464      -0.999191
Rotational constants (GHz):    2.5793500    1.6307200    1.1579300
Vibrational harmonic frequencies (cm-1):
       23.6969                   58.4108                  132.3345            
      164.5839                  199.0826                  216.6921            
      280.8366                  320.5261                  381.6193            
      386.6381                  528.8669                  572.3737            
      614.8579                  776.2974                  854.9305            
      893.9685                  973.2870                  992.2028            
     1030.1971                 1072.2597                 1095.1143            
     1184.1722                 1200.4864                 1231.9331            
     1262.4902                 1303.4023                 1328.5719            
     1356.8879                 1397.4897                 1415.4413            
     1423.4672                 1472.9296                 1483.7819            
     1495.5237                 1502.2582                 1800.5278            
     3044.4417                 3056.4649                 3090.8389            
     3096.1945                 3134.4264                 3134.7851            
     3154.8935                 3177.6820                 3922.3740            
Zero-point correction (Hartree): 0.139516

HOCHCCH3CH2CH2OO.Zgptc
~~~~~~~~~~~~~~~~~~~~~~
E(UM062X/Aug-CC-pVTZ) (Hartree): -421.45306200 
Electronic state : 2-A
Cartesian coordinates (Angs):
     C      -1.371459      1.110287      -0.212460
     C      -1.279054     -0.192751       0.039897
     C      -0.238619     -0.760398       0.970525
     C       1.076458     -1.083310       0.289359
     O       1.692400      0.187561      -0.031864
     O       2.794303      0.047624      -0.699848
     O      -0.565969      2.095075       0.262908
     H      -2.159874      1.507199      -0.839848
     C      -2.218373     -1.170693      -0.601847
     H      -0.038244     -0.078086       1.801032
     H      -0.616913     -1.684079       1.412400
     H       1.770432     -1.617850       0.936960
     H       0.946632     -1.624807      -0.646736
     H       0.302756      1.738926       0.479120
     H      -2.920348     -0.670727      -1.267018
     H      -2.789432     -1.717126       0.152526
     H      -1.674596     -1.914337      -1.190851
Rotational constants (GHz):    2.8029500    1.4171900    1.0897600
Vibrational harmonic frequencies (cm-1):
       57.3231                   80.2590                  130.1165            
      196.3217                  214.8427                  249.4889            
      312.0548                  331.1202                  379.1148            
      419.9506                  492.9681                  589.0586            
      621.0146                  776.7252                  853.3318            
      924.1319                  978.4966                 1023.9317            
     1044.5439                 1072.3649                 1089.5633            
     1187.7336                 1201.8755                 1242.6615            
     1288.0289                 1295.5147                 1324.7652            
     1375.5354                 1395.8599                 1414.3787            
     1424.0857                 1480.8590                 1485.3804            
     1499.6902                 1502.5269                 1768.9913            
     3039.1369                 3057.5259                 3085.6433            
     3086.1935                 3104.6398                 3138.6926            
     3146.6525                 3200.4163                 3835.2996            
Zero-point correction (Hartree): 0.139922

HOCHCCH3CH2CH2OO.Zgtmt
~~~~~~~~~~~~~~~~~~~~~~
E(UM062X/Aug-CC-pVTZ) (Hartree): -421.45141848 
Electronic state : 2-A
Cartesian coordinates (Angs):
     C       1.910795      0.759196       0.121764
     C       1.289882     -0.377677      -0.163657
     C      -0.151579     -0.373830      -0.595839
     C      -1.058966     -0.353502       0.623931
     O      -2.443031     -0.497986       0.240163
     O      -2.891044      0.578278      -0.330829
     O       1.269773      1.963812       0.025290
     H       2.943778      0.787010       0.449125
     C       1.978439     -1.700807      -0.021869
     H      -0.376871      0.502971      -1.201488
     H      -0.368963     -1.266471      -1.184824
     H      -0.873423     -1.199722       1.283912
     H      -0.959773      0.582450       1.170849
     H       1.885295      2.681120       0.181772
     H       2.995821     -1.587669       0.349828
     H       2.019433     -2.220512      -0.981357
     H       1.437702     -2.352289       0.669216
Rotational constants (GHz):    3.1249400    1.1802200    0.9183300
Vibrational harmonic frequencies (cm-1):
       43.1009                   58.2287                  115.8739            
      165.0305                  197.0364                  238.2868            
      252.7400                  310.3572                  332.7529            
      401.3085                  536.1713                  573.7785            
      594.5100                  790.6777                  875.4494            
      885.5576                  963.3209                 1008.2226            
     1055.7709                 1071.9139                 1084.4082            
     1192.6253                 1201.1349                 1234.1893            
     1271.0156                 1303.6814                 1323.4556            
     1342.5573                 1394.4848                 1404.8444            
     1422.0094                 1481.0544                 1484.2054            
     1496.6169                 1504.6700                 1794.8701            
     3045.1051                 3073.9297                 3094.3677            
     3096.8570                 3130.5898                 3137.3229            
     3160.9014                 3185.7677                 3918.9888            
Zero-point correction (Hartree): 0.139537

HOCHCCH3CH2CH2OO.Zgtpc
~~~~~~~~~~~~~~~~~~~~~~
E(UM062X/Aug-CC-pVTZ) (Hartree): -421.45153269 
Electronic state : 2-A
Cartesian coordinates (Angs):
     C      -2.172461     -0.321246       0.095284
     C      -1.165908      0.518131      -0.127722
     C       0.187291      0.041686      -0.584998
     C       1.068171     -0.279022       0.612972
     O       2.385520     -0.687902       0.189328
     O       3.064743      0.317159      -0.272783
     O      -2.164945     -1.672241      -0.066668
     H      -3.137976      0.022345       0.441649
     C      -1.322705      1.991198       0.109069
     H       0.126622     -0.838889      -1.230495
     H       0.680113      0.819819      -1.169329
     H       1.185360      0.584699       1.265590
     H       0.686718     -1.124351       1.183673
     H      -1.320539     -1.962562      -0.423113
     H      -2.308195      2.227326       0.506967
     H      -1.184559      2.550868      -0.818376
     H      -0.576415      2.360131       0.816786
Rotational constants (GHz):    3.3818200    1.0889300    0.8774500
Vibrational harmonic frequencies (cm-1):
       47.0904                   59.3591                  123.6889            
      170.7596                  199.3611                  262.7582            
      289.7434                  348.5679                  378.5753            
      401.8149                  542.5799                  582.9100            
      584.9880                  790.7431                  859.8135            
      922.9408                  969.4043                 1012.0313            
     1055.9308                 1070.7385                 1080.7951            
     1181.8975                 1203.1236                 1241.7774            
     1275.1277                 1291.2127                 1326.6449            
     1338.6892                 1396.8576                 1407.5070            
     1424.5132                 1482.0798                 1488.2826            
     1500.1410                 1517.0705                 1774.5180            
     3046.0285                 3051.1932                 3094.0154            
     3095.2825                 3107.2019                 3139.8687            
     3155.7517                 3215.6197                 3868.0294            
Zero-point correction (Hartree): 0.139827

HOCHCCH3CH2CH2OO.Zgtpt
~~~~~~~~~~~~~~~~~~~~~~
E(UM062X/Aug-CC-pVTZ) (Hartree): -421.45212613 
Electronic state : 2-A
Cartesian coordinates (Angs):
     C       2.127603     -0.341528      -0.095140
     C       1.165326      0.542943       0.129471
     C      -0.187364      0.093080       0.611583
     C      -1.043209     -0.328801      -0.571457
     O      -2.372897     -0.693155      -0.141944
     O      -3.062456      0.351967       0.198994
     O       1.924794     -1.681023       0.107142
     H       3.108102     -0.051935      -0.454980
     C       1.367680      2.004129      -0.131708
     H      -0.093737     -0.750153       1.295365
     H      -0.694026      0.907621       1.130262
     H      -1.146821      0.470655      -1.304120
     H      -0.647740     -1.226149      -1.042759
     H       2.747212     -2.160115      -0.002551
     H       2.358161      2.207788      -0.536103
     H       1.245541      2.581101       0.787141
     H       0.627563      2.379937      -0.842295
Rotational constants (GHz):    3.3237100    1.1223700    0.8913600
Vibrational harmonic frequencies (cm-1):
       44.5717                   62.7876                  124.9787            
      165.7322                  198.6336                  247.3023            
      251.3303                  323.5266                  341.8888            
      388.0639                  534.2879                  585.8553            
      590.3510                  792.7493                  869.2410            
      883.3122                  966.9106                 1011.3992            
     1053.3917                 1076.6941                 1081.4453            
     1191.2637                 1199.1809                 1233.0549            
     1281.3985                 1292.1512                 1332.3943            
     1337.5528                 1393.4216                 1403.6697            
     1422.3264                 1480.7076                 1484.0234            
     1495.7953                 1503.7741                 1794.3768            
     3046.1018                 3078.2855                 3095.8321            
     3096.8492                 3128.8474                 3136.0435            
     3162.9429                 3187.1175                 3917.9089            
Zero-point correction (Hartree): 0.139628

HOCHCCH3CH2CH2OO.Zgttc
~~~~~~~~~~~~~~~~~~~~~~
E(UM062X/Aug-CC-pVTZ) (Hartree): -421.45042784 
Electronic state : 2-A
Cartesian coordinates (Angs):
     C       2.104641     -0.568463      -0.240010
     C       1.312290      0.440597       0.107703
     C      -0.027993      0.218210       0.760028
     C      -1.112626      0.082160      -0.291915
     O      -2.377396     -0.051830       0.392218
     O      -3.360089     -0.181256      -0.444657
     O       1.870417     -1.896168      -0.060880
     H       3.059988     -0.404822      -0.720364
     C       1.705336      1.861328      -0.170639
     H      -0.036159     -0.666473       1.402354
     H      -0.266928      1.063845       1.407142
     H      -1.175497      0.961918      -0.931327
     H      -0.976950     -0.802550      -0.913781
     H       1.034099     -2.032532       0.393316
     H       2.655471      1.914321      -0.699395
     H       1.798883      2.428605       0.757942
     H       0.953749      2.368736      -0.780328
Rotational constants (GHz):    3.3294000    1.0160900    0.8374500
Vibrational harmonic frequencies (cm-1):
       38.7932                   77.6442                   94.8878            
      139.8178                  200.9508                  250.4780            
      290.2145                  327.8353                  372.3155            
      417.0661                  482.9092                  583.9397            
      592.0907                  785.2912                  855.9910            
      925.0215                 1001.1203                 1021.6723            
     1060.4102                 1069.2113                 1106.8713            
     1179.7885                 1189.0477                 1240.3022            
     1286.7704                 1294.3287                 1310.4366            
     1338.5068                 1401.1275                 1410.1341            
     1425.0838                 1483.4063                 1498.2418            
     1503.4465                 1519.3107                 1774.2744            
     3045.0797                 3053.4774                 3085.9181            
     3093.3019                 3098.8228                 3140.5612            
     3143.5995                 3217.9271                 3868.9362            
Zero-point correction (Hartree): 0.139643

HOCHCCH3CH2CH2OO.Zgttt
~~~~~~~~~~~~~~~~~~~~~~
E(UM062X/Aug-CC-pVTZ) (Hartree): -421.45104760 
Electronic state : 2-A
Cartesian coordinates (Angs):
     C      -2.053189      0.599099      -0.225343
     C      -1.317933     -0.453371       0.106343
     C       0.021659     -0.269816       0.769411
     C       1.093315     -0.063957      -0.283016
     O       2.369121      0.010541       0.392306
     O       3.344002      0.172234      -0.447333
     O      -1.626086      1.874716       0.028101
     H      -3.014937      0.501082      -0.715376
     C      -1.764448     -1.849604      -0.202493
     H       0.006837      0.594417       1.432625
     H       0.267704     -1.151374       1.363568
     H       1.148329     -0.892628      -0.988741
     H       0.949566      0.869895      -0.824176
     H      -2.309986      2.504765      -0.202678
     H      -2.716664     -1.859774      -0.730790
     H      -1.874359     -2.432432       0.714363
     H      -1.029221     -2.367983      -0.822790
Rotational constants (GHz):    3.3026200    1.0414100    0.8528300
Vibrational harmonic frequencies (cm-1):
       35.2380                   76.3247                   96.6421            
      134.4576                  191.2049                  232.7439            
      239.3380                  307.2442                  337.3690            
      392.6337                  476.7409                  587.3282            
      593.6222                  784.7065                  865.6428            
      884.6411                 1000.0943                 1019.4168            
     1061.7149                 1066.9938                 1109.0101            
     1185.1855                 1197.6959                 1224.3470            
     1291.9015                 1296.4355                 1313.5955            
     1338.5135                 1394.3958                 1409.3311            
     1422.4374                 1481.1256                 1490.5724            
     1501.6101                 1505.9176                 1795.8774            
     3045.8563                 3073.8538                 3087.7664            
     3095.3978                 3123.9218                 3137.3848            
     3150.5048                 3187.7628                 3918.4496            
Zero-point correction (Hartree): 0.139339

HOCHCCH3CH2CH2OO.Zlpmt
~~~~~~~~~~~~~~~~~~~~~~
E(UM062X/Aug-CC-pVTZ) (Hartree): -421.45151641 
Electronic state : 2-A
Cartesian coordinates (Angs):
     C       1.709130     -0.226743      -0.323255
     C       0.795301      0.611124       0.149026
     C      -0.135776      0.198069       1.251049
     C      -1.593007      0.117408       0.813127
     O      -1.758911     -0.884811      -0.205799
     O      -1.500924     -0.409033      -1.388435
     O       1.864615     -1.493909       0.166624
     H       2.384572      0.062005      -1.120454
     C       0.651378      1.990819      -0.417397
     H       0.163263     -0.765875       1.658631
     H      -0.093554      0.929779       2.064129
     H      -2.229950     -0.209878       1.632958
     H      -1.960679      1.057390       0.405589
     H       2.506297     -1.971295      -0.360311
     H      -0.318260      2.112806      -0.904269
     H       1.422064      2.196291      -1.158778
     H       0.725858      2.746742       0.368080
Rotational constants (GHz):    2.4927700    1.5844300    1.3619900
Vibrational harmonic frequencies (cm-1):
       38.5354                   95.0414                  105.8187            
      171.9951                  201.3511                  235.2032            
      277.7503                  319.9738                  379.0078            
      387.2898                  530.7926                  560.7205            
      611.0331                  778.5857                  863.2415            
      888.8703                  973.1139                  999.1345            
     1033.8970                 1072.5724                 1078.9874            
     1185.7482                 1204.4895                 1233.3178            
     1243.8367                 1315.2524                 1326.5390            
     1359.1635                 1393.7535                 1416.5175            
     1419.5859                 1471.0735                 1483.8980            
     1491.5533                 1505.6461                 1794.0954            
     3046.5267                 3048.6438                 3096.0378            
     3101.3892                 3132.5287                 3136.3074            
     3157.4578                 3183.7466                 3922.8972            
Zero-point correction (Hartree): 0.139590

HOCHCCH3CH2CH2OO.Zlppt
~~~~~~~~~~~~~~~~~~~~~~
E(UM062X/Aug-CC-pVTZ) (Hartree): -421.45063142 
Electronic state : 2-A
Cartesian coordinates (Angs):
     C       1.819552     -0.330908      -0.295792
     C       0.907450      0.556593       0.077349
     C      -0.151373      0.204237       1.084539
     C      -1.554601      0.556428       0.624112
     O      -1.857585     -0.056339      -0.648478
     O      -1.921103     -1.348537      -0.548453
     O       1.866143     -1.596525       0.219269
     H       2.588540     -0.082635      -1.018835
     C       0.908945      1.941423      -0.497872
     H      -0.110448     -0.857348       1.317768
     H       0.020190      0.753581       2.016356
     H      -2.305341      0.217826       1.336218
     H      -1.677583      1.621621       0.436252
     H       2.486993     -2.129793      -0.278425
     H       1.785546      2.109178      -1.121442
     H       0.908141      2.695031       0.293948
     H       0.024480      2.117110      -1.114549
Rotational constants (GHz):    2.5875400    1.5287200    1.1667400
Vibrational harmonic frequencies (cm-1):
       25.7644                   49.2800                  143.5286            
      167.0971                  194.1854                  236.4249            
      278.4320                  313.8739                  362.1245            
      405.1788                  512.5127                  567.3335            
      624.1476                  775.2516                  848.2362            
      891.7903                  976.0122                  984.2137            
     1030.8415                 1070.1423                 1099.5314            
     1187.0526                 1205.5319                 1235.7481            
     1259.3822                 1295.7444                 1330.1128            
     1357.1006                 1401.9563                 1418.2209            
     1421.4405                 1472.1631                 1484.9152            
     1492.4410                 1509.2736                 1800.8498            
     3041.9735                 3043.3968                 3091.0038            
     3098.1414                 3136.7252                 3141.4738            
     3157.9596                 3179.4653                 3920.8526            
Zero-point correction (Hartree): 0.139512

HOCHCCH3CH2CH2OO.Zlptt
~~~~~~~~~~~~~~~~~~~~~~
E(UM062X/Aug-CC-pVTZ) (Hartree): -421.45028605 
Electronic state : 2-A
Cartesian coordinates (Angs):
     C      -1.999039      0.048185      -0.452034
     C      -0.949007     -0.534742       0.109762
     C      -0.098358      0.197613       1.112093
     C       1.387094      0.049875       0.860514
     O       1.669237      0.580826      -0.453851
     O       2.902767      0.373239      -0.795236
     O      -2.371765      1.330853      -0.154412
     H      -2.623033     -0.474901      -1.167680
     C      -0.587990     -1.950106      -0.229491
     H      -0.365097      1.252916       1.129000
     H      -0.285842     -0.197648       2.115933
     H       1.981323      0.618614       1.574282
     H       1.718042     -0.987696       0.863734
     H      -3.072826      1.612212      -0.743375
     H      -1.339358     -2.404120      -0.873313
     H      -0.502860     -2.560579       0.673214
     H       0.371533     -2.003091      -0.748869
Rotational constants (GHz):    3.1424900    1.1632600    1.0333300
Vibrational harmonic frequencies (cm-1):
       31.1387                   57.4874                  108.7861            
      193.6568                  213.3292                  241.8764            
      280.4807                  312.9197                  337.6982            
      395.8865                  470.8439                  561.6418            
      628.8962                  777.3126                  841.8577            
      886.3631                  973.2580                 1014.9300            
     1045.7805                 1075.9053                 1095.4822            
     1182.3439                 1204.6011                 1236.3738            
     1270.4945                 1298.6339                 1322.9877            
     1356.8018                 1401.3671                 1418.2395            
     1424.0884                 1470.8202                 1485.0320            
     1497.3576                 1514.2876                 1801.0893            
     3043.5390                 3045.9127                 3091.0014            
     3095.0292                 3129.7364                 3138.1720            
     3148.3095                 3183.1646                 3920.9824            
Zero-point correction (Hartree): 0.139483

HOCHCCH3CH2CH2OO.Zpmtc
~~~~~~~~~~~~~~~~~~~~~~
E(UM062X/Aug-CC-pVTZ) (Hartree): -421.44892315 
Electronic state : 2-A
Cartesian coordinates (Angs):
     C       1.225893      1.208723       0.077346
     C       1.410632     -0.105668      -0.028430
     C       0.343809     -1.167296      -0.161927
     C      -1.005756     -0.923354       0.481733
     O      -1.808500     -0.110126      -0.414995
     O      -3.030709      0.014428       0.005569
     O       0.073591      1.925072       0.060217
     H       2.079423      1.862132       0.207285
     C       2.814589     -0.644409      -0.047855
     H       0.183558     -1.430688      -1.213029
     H       0.736846     -2.074807       0.302965
     H      -1.558074     -1.849666       0.622762
     H      -0.932562     -0.385217       1.426376
     H      -0.657800      1.417526      -0.308304
     H       3.551357      0.153489       0.021877
     H       3.006202     -1.197355      -0.971065
     H       2.980993     -1.338376       0.779600
Rotational constants (GHz):    3.6361300    1.2623400    0.9796100
Vibrational harmonic frequencies (cm-1):
       19.6519                   76.2984                  145.2685            
      207.5452                  220.5482                  267.3857            
      294.9970                  345.4938                  349.8160            
      448.9702                  518.0648                  563.8675            
      624.1732                  787.7658                  832.0384            
      925.1017                 1004.3463                 1016.8289            
     1036.8728                 1075.0445                 1108.9520            
     1184.7616                 1207.4077                 1234.1039            
     1280.7706                 1305.7384                 1323.5230            
     1391.9311                 1412.2769                 1419.7006            
     1431.2856                 1463.8643                 1485.3120            
     1500.8632                 1503.7261                 1772.1061            
     3039.4061                 3041.9396                 3077.8754            
     3087.7320                 3096.2801                 3142.7642            
     3155.4912                 3200.5034                 3814.3305            
Zero-point correction (Hartree): 0.139977

HOCHCCH3CH2CH2OO.Zptpc
~~~~~~~~~~~~~~~~~~~~~~
E(UM062X/Aug-CC-pVTZ) (Hartree): -421.45311898 
Electronic state : 2-A
Cartesian coordinates (Angs):
     C      -1.337776      1.167113       0.144008
     C      -1.356078     -0.137348      -0.121298
     C      -0.086233     -0.827402      -0.549217
     C       0.933326     -0.932568       0.592911
     O       2.279812     -0.698882       0.113257
     O       2.414009      0.523274      -0.297511
     O      -0.265061      1.992419       0.069056
     H      -2.225219      1.700550       0.458868
     C      -2.610523     -0.947993       0.004703
     H      -0.305186     -1.817407      -0.945692
     H       0.390244     -0.264818      -1.356330
     H       0.747120     -0.187308       1.364677
     H       0.975110     -1.922479       1.039906
     H       0.546981      1.524914      -0.173442
     H      -2.881161     -1.403777      -0.950454
     H      -3.446566     -0.332927       0.334061
     H      -2.487689     -1.762045       0.723351
Rotational constants (GHz):    3.2290800    1.3886100    1.0409300
Vibrational harmonic frequencies (cm-1):
       70.9878                   75.4034                  181.5667            
      196.5113                  214.0703                  295.3972            
      296.6820                  349.5854                  401.9228            
      527.4069                  567.3644                  592.9057            
      606.8148                  804.7100                  871.8093            
      930.0972                  964.8976                 1014.9382            
     1033.8493                 1073.4721                 1075.2889            
     1200.6918                 1213.1969                 1246.7772            
     1288.4881                 1302.6108                 1325.8487            
     1368.4561                 1398.8044                 1406.8098            
     1423.7255                 1482.5153                 1494.0460            
     1503.4373                 1508.8030                 1762.0564            
     3042.6950                 3059.0856                 3090.0887            
     3100.2097                 3121.8062                 3137.0446            
     3166.2918                 3210.1517                 3747.9121            
Zero-point correction (Hartree): 0.140671


TS.HOCHCCH3CH2CH2OO.cycHOCHCCH3CH2CH2OO.Zh
~~~~~~~~~~~~~~~~~~~~~~~~~~~~~~~~~~~~~~~~~~
E(CCSD(T)/Aug-CC-pVTZ) (Hartree): -420.82290136 
E(CCSD/Aug-CC-pVTZ) (Hartree): -420.74780200 
     T1 diagnostic:  0.027632 
E(MP2/Aug-CC-pVTZ) (Hartree): -420.68959699 
E(MP3/Aug-CC-pVTZ) (Hartree): -420.72757334 
E(PMP2/Aug-CC-pVTZ) (Hartree): -420.70732238 
E(PMP3/Aug-CC-pVTZ) (Hartree): -420.74089315 
E(PUHF/Aug-CC-pVTZ) (Hartree): -419.15569713 
E(UHF/Aug-CC-pVTZ) (Hartree): -419.13522923 
E(UM062X/Aug-CC-pVTZ) (Hartree): -421.42867123 
Electronic state : 2-A
Cartesian coordinates (Angs):
     C      -0.225486      1.261185      -0.046634
     C      -1.014997      0.183361       0.288575
     C      -0.363531     -0.892676       1.084760
     C       0.671914     -1.572693       0.150479
     O       1.553838     -0.605444      -0.371589
     O       0.868505      0.186239      -1.267089
     O       0.726247      1.683063       0.817033
     H      -0.561307      1.977356      -0.789752
     C      -2.230068     -0.138468      -0.510283
     H       0.163980     -0.494518       1.949035
     H      -1.084801     -1.640822       1.415571
     H       1.293669     -2.278879       0.700038
     H       0.165493     -2.081734      -0.672729
     H       1.456220      2.067705       0.320778
     H      -2.071248     -1.044599      -1.103181
     H      -2.493173      0.669297      -1.190938
     H      -3.084554     -0.328926       0.142964
Rotational constants (GHz):    2.5274700    2.1855300    1.6981700
Vibrational harmonic frequencies (cm-1):
     i607.7865                  138.5662                  158.4735            
      173.2502                  238.6210                  275.5832            
      323.6091                  378.7176                  434.5920            
      442.6917                  493.6161                  596.9295            
      629.7035                  804.2215                  874.7583            
      916.7996                  979.4077                  996.0024            
     1008.2363                 1035.3478                 1071.6900            
     1083.2220                 1187.9358                 1218.4413            
     1238.7452                 1263.3048                 1313.8985            
     1321.9079                 1364.1076                 1396.5419            
     1416.4615                 1474.0568                 1476.2740            
     1485.8078                 1494.4816                 1580.6759            
     3035.2683                 3061.8629                 3082.5547            
     3086.4816                 3128.0387                 3140.5013            
     3146.2336                 3165.6929                 3852.5523            
Zero-point correction (Hartree): 0.138936

TS.HOCHCCH3CH2CH2OO.cycHOCHCCH3CH2CH2OO.Zp
~~~~~~~~~~~~~~~~~~~~~~~~~~~~~~~~~~~~~~~~~~
E(CCSD(T)/Aug-CC-pVTZ) (Hartree): -420.82459295 
E(CCSD/Aug-CC-pVTZ) (Hartree): -420.74901814 
     T1 diagnostic:  0.026545 
E(MP2/Aug-CC-pVTZ) (Hartree): -420.69314458 
E(MP3/Aug-CC-pVTZ) (Hartree): -420.73006351 
E(PMP2/Aug-CC-pVTZ) (Hartree): -420.71010883 
E(PMP3/Aug-CC-pVTZ) (Hartree): -420.74269577 
E(PUHF/Aug-CC-pVTZ) (Hartree): -419.15379424 
E(UHF/Aug-CC-pVTZ) (Hartree): -419.13410207 
E(UM062X/Aug-CC-pVTZ) (Hartree): -421.42980062 
Electronic state : 2-A
Cartesian coordinates (Angs):
     C       0.264881      1.272855      -0.006594
     C       1.007221      0.142348      -0.318909
     C       0.312532     -0.947264      -1.060958
     C      -0.752520     -1.543270      -0.111180
     O      -1.543094     -0.494526       0.416411
     O      -0.761392      0.238666       1.298738
     O      -0.752451      1.742482      -0.753384
     H       0.698749      2.032966       0.632045
     C       2.234549     -0.182764       0.460105
     H      -0.185913     -0.568288      -1.954860
     H       1.007489     -1.731098      -1.362977
     H      -1.439278     -2.204613      -0.639172
     H      -0.278491     -2.076997       0.713862
     H      -1.414245      1.040369      -0.847075
     H       2.049751     -1.019782       1.140764
     H       2.570915      0.664760       1.054642
     H       3.046541     -0.481714      -0.206128
Rotational constants (GHz):    2.5474400    2.2040800    1.7088700
Vibrational harmonic frequencies (cm-1):
     i589.2412                  148.4698                  166.7360            
      186.3656                  244.1548                  319.1700            
      376.0619                  425.6069                  442.8246            
      467.7017                  500.0235                  595.2845            
      636.0796                  795.4367                  881.5022            
      903.5941                  973.4984                  995.5179            
     1005.8630                 1031.3427                 1069.6499            
     1073.5617                 1184.2861                 1214.3732            
     1262.1894                 1269.6616                 1312.8932            
     1340.3680                 1369.4256                 1395.9655            
     1416.7420                 1475.8834                 1481.4894            
     1487.0234                 1499.0715                 1554.8259            
     3035.0817                 3069.2795                 3071.9588            
     3088.6041                 3120.4220                 3135.5229            
     3141.8760                 3197.3187                 3731.1289            
Zero-point correction (Hartree): 0.139182


TS.HOCHCCH3CH2CH2OO.1-6Hshift.a.Zc
~~~~~~~~~~~~~~~~~~~~~~~~~~~~~~~~~~
E(UM062X/Aug-CC-pVTZ) (Hartree): -421.41388538 
Electronic state : 2-A
Cartesian coordinates (Angs):
     O      -1.953200      0.709729      -0.843874
     H      -1.081665      1.382104      -0.240421
     C      -0.088042      1.598713       0.548536
     O      -2.176009     -0.349107       0.009137
     C       0.726041      0.401034       0.371658
     C      -1.110227     -1.286587      -0.097239
     C       0.083660     -0.903718       0.775320
     H      -0.639485      1.655303       1.485836
     H       0.370484      2.537415       0.253653
     C       1.930202      0.489202      -0.211689
     O       2.779922     -0.520931      -0.504577
     H       2.344672      1.445286      -0.502068
     H      -1.537182     -2.229748       0.245099
     H      -0.827718     -1.372330      -1.147986
     H       0.790085     -1.738092       0.760909
     H      -0.266085     -0.821483       1.807747
     H       2.391381     -1.367842      -0.267779
Rotational constants (GHz):    3.5653900    1.3311700    1.1269500
Vibrational harmonic frequencies (cm-1):
    i2089.6467                   73.3864                  144.2458            
      252.2848                  254.3888                  295.2603            
      348.6658                  402.9211                  446.4342            
      498.5905                  580.1781                  589.5122            
      631.7255                  644.0132                  781.6250            
      877.4454                  914.9174                  957.1782            
     1014.4730                 1019.6854                 1050.7670            
     1089.1779                 1119.6484                 1187.5560            
     1205.4486                 1238.3923                 1283.2037            
     1302.1902                 1329.7816                 1360.7501            
     1395.0488                 1421.0353                 1461.2732            
     1480.4697                 1489.5087                 1522.7000            
     1708.9601                 3049.8736                 3067.4395            
     3089.7423                 3096.8584                 3127.0348            
     3191.0539                 3217.8402                 3869.7027            
Zero-point correction (Hartree): 0.134600

TS.HOCHCCH3CH2CH2OO.1-6Hshift.a.Zt
~~~~~~~~~~~~~~~~~~~~~~~~~~~~~~~~~~
E(CCSD(T)/Aug-CC-pVTZ) (Hartree): -420.80534605 
E(CCSD/Aug-CC-pVTZ) (Hartree): -420.73022356 
     T1 diagnostic:  0.025215 
E(MP2/Aug-CC-pVTZ) (Hartree): -420.67701734 
E(MP3/Aug-CC-pVTZ) (Hartree): -420.71328940 
E(PMP2/Aug-CC-pVTZ) (Hartree): -420.69250327 
E(PMP3/Aug-CC-pVTZ) (Hartree): -420.72444558 
E(PUHF/Aug-CC-pVTZ) (Hartree): -419.13115853 
E(UHF/Aug-CC-pVTZ) (Hartree): -419.11271414 
E(UM062X/Aug-CC-pVTZ) (Hartree): -421.41444056 
Electronic state : 2-A
Cartesian coordinates (Angs):
     O      -1.958174      0.689970      -0.852131
     H      -1.100700      1.371563      -0.255314
     C      -0.107906      1.612556       0.537761
     O      -2.173687     -0.365790       0.004806
     C       0.708535      0.416080       0.378459
     C      -1.093869     -1.293638      -0.088837
     C       0.092307     -0.898487       0.784797
     H      -0.666306      1.675348       1.470149
     H       0.342921      2.551728       0.231718
     C       1.910845      0.483199      -0.203602
     O       2.663257     -0.627244      -0.435099
     H       2.336862      1.429326      -0.517010
     H      -1.514879     -2.238742       0.254936
     H      -0.805100     -1.382272      -1.137196
     H       0.835255     -1.693932       0.735464
     H      -0.255891     -0.826943       1.818525
     H       3.517194     -0.379830      -0.793344
Rotational constants (GHz):    3.5570000    1.3494100    1.1376500
Vibrational harmonic frequencies (cm-1):
    i2125.9030                   73.8258                  144.8234            
      242.5021                  249.7489                  277.2143            
      327.3942                  345.9792                  434.1601            
      488.7135                  585.1494                  591.6852            
      631.5893                  647.1744                  787.8479            
      874.9232                  885.4648                  959.9891            
     1010.0703                 1018.8154                 1048.2654            
     1086.5471                 1119.0282                 1196.7306            
     1207.3084                 1240.5505                 1248.2845            
     1297.1116                 1342.5440                 1356.1230            
     1389.9385                 1421.1517                 1460.2205            
     1479.4794                 1483.1757                 1522.4986            
     1730.6236                 3059.4946                 3072.5546            
     3098.4729                 3125.9796                 3131.2908            
     3185.5875                 3190.1089                 3913.8734            
Zero-point correction (Hartree): 0.134375

TS.HOCHCCH3CH2CH2OO.1-6Hshift.b.Zc
~~~~~~~~~~~~~~~~~~~~~~~~~~~~~~~~~~
E(UM062X/Aug-CC-pVTZ) (Hartree): -421.41379943 
Electronic state : 2-A
Cartesian coordinates (Angs):
     O      -2.172289      0.392037      -0.380920
     H      -1.317307      1.295368      -0.178889
     C      -0.206735      1.814036       0.262017
     O      -1.391242     -0.629704      -0.865925
     C       0.611405      0.617457       0.350430
     C      -0.866227     -1.382095       0.221721
     C       0.006509     -0.517110       1.144415
     H      -0.575528      2.200157       1.210717
     H       0.132768      2.587840      -0.419221
     C       1.731349      0.477639      -0.376591
     O       2.518254     -0.619024      -0.430998
     H       2.115330      1.275673      -0.997117
     H      -1.684337     -1.853060       0.769799
     H      -0.276027     -2.153903      -0.274322
     H       0.755735     -1.145670       1.632699
     H      -0.605105     -0.096046       1.941020
     H       2.158878     -1.316387       0.126103
Rotational constants (GHz):    3.1329900    1.5781800    1.3050800
Vibrational harmonic frequencies (cm-1):
    i2020.1929                   84.2323                  122.3046            
      255.4016                  284.1316                  331.6035            
      358.5807                  390.2188                  436.0733            
      500.3482                  540.9057                  592.0663            
      625.1512                  680.8618                  806.0707            
      858.9725                  915.1989                  955.7221            
     1018.3961                 1026.9489                 1073.6031            
     1080.3392                 1124.4093                 1184.5750            
     1219.6511                 1273.1274                 1280.3392            
     1294.0000                 1322.8966                 1362.4060            
     1385.3673                 1413.3022                 1475.8292            
     1489.2252                 1497.7021                 1511.2492            
     1696.0246                 3056.3752                 3066.6361            
     3098.0780                 3108.6079                 3127.2132            
     3190.4441                 3221.2841                 3857.8356            
Zero-point correction (Hartree): 0.134853

TS.HOCHCCH3CH2CH2OO.1-6Hshift.b.Zt
~~~~~~~~~~~~~~~~~~~~~~~~~~~~~~~~~~
E(UM062X/Aug-CC-pVTZ) (Hartree): -421.41432079 
Electronic state : 2-A
Cartesian coordinates (Angs):
     O      -2.168964      0.339083      -0.413326
     H      -1.346566      1.264500      -0.213022
     C      -0.251609      1.827108       0.230581
     O      -1.354748     -0.671518      -0.861320
     C       0.581625      0.646906       0.357829
     C      -0.820534     -1.388581       0.250952
     C       0.004495     -0.482768       1.174198
     H      -0.642849      2.226174       1.164337
     H       0.078148      2.591364      -0.466420
     C       1.697711      0.483597      -0.364566
     O       2.402750     -0.677734      -0.310386
     H       2.081282      1.259780      -1.015882
     H      -1.633378     -1.880493       0.788119
     H      -0.184189     -2.137160      -0.219485
     H       0.785654     -1.075760       1.647731
     H      -0.630097     -0.067457       1.955818
     H       3.189563     -0.617176      -0.854909
Rotational constants (GHz):    3.1095600    1.6159400    1.3292500
Vibrational harmonic frequencies (cm-1):
    i2067.2203                   80.7269                  124.9799            
      250.6726                  266.1617                  300.6704            
      356.4600                  362.9145                  392.0901            
      485.5641                  539.6044                  596.8966            
      623.0864                  686.1959                  811.2804            
      863.2249                  869.4587                  959.7051            
     1018.4655                 1026.5592                 1065.5672            
     1082.7047                 1121.8113                 1197.6638            
     1225.5901                 1247.1964                 1275.1394            
     1282.8936                 1324.1650                 1362.3878            
     1380.6641                 1412.3404                 1475.0907            
     1485.7310                 1494.0201                 1503.3449            
     1716.2163                 3068.8958                 3089.5693            
     3101.5952                 3126.8974                 3144.1488            
     3189.2682                 3192.6181                 3910.7707            
Zero-point correction (Hartree): 0.134619


#################################################################################
E-HOCH=CHCH2CH2OO ring closure
#################################################################################

HOCHCHCH2CH2OO.Ecpmc
~~~~~~~~~~~~~~~~~~~~
E(UM062X/Aug-CC-pVTZ) (Hartree): -382.13875016 
Electronic state : 2-A
Cartesian coordinates (Angs):
     C      -1.464605     -0.422977       0.119382
     C      -1.214437      0.847892      -0.164136
     C       0.132747      1.506700      -0.092726
     C       1.242428      0.655855       0.476854
     O       1.542377     -0.394003      -0.472187
     O       2.422013     -1.221736      -0.000305
     O      -2.679471     -1.027466       0.067432
     H      -0.700741     -1.127820       0.419328
     H      -2.038291      1.479660      -0.483204
     H       0.436862      1.853511      -1.084376
     H       0.067173      2.402931       0.529284
     H       2.158746      1.227493       0.615094
     H       0.967614      0.177698       1.416724
     H      -3.347513     -0.392658      -0.208613
Rotational constants (GHz):    4.5202800    1.4779300    1.1717900
Vibrational harmonic frequencies (cm-1):
       48.1026                  124.2428                  131.8012            
      214.6629                  263.0421                  302.0468            
      395.1256                  448.3625                  524.2222            
      619.2420                  798.5684                  872.2430            
      939.1204                  992.9402                 1001.4340            
     1064.1514                 1112.3987                 1161.7700            
     1229.2525                 1254.3525                 1293.3706            
     1297.0187                 1350.5167                 1387.6863            
     1403.8246                 1421.8062                 1476.3599            
     1506.1178                 1767.7863                 3052.5511            
     3078.7936                 3092.3963                 3144.1966            
     3156.9067                 3222.3314                 3857.5254            
Zero-point correction (Hartree): 0.111644

HOCHCHCH2CH2OO.Ecpmt
~~~~~~~~~~~~~~~~~~~~
E(UM062X/Aug-CC-pVTZ) (Hartree): -382.13755268 
Electronic state : 2-A
Cartesian coordinates (Angs):
     C      -1.459720     -0.380138       0.100018
     C      -1.195673      0.890109      -0.161260
     C       0.160351      1.527147      -0.087119
     C       1.259783      0.656818       0.472133
     O       1.538632     -0.395509      -0.482336
     O       2.331305     -1.292747       0.015563
     O      -2.730887     -0.869703       0.027081
     H      -0.695940     -1.096969       0.379060
     H      -2.021999      1.524596      -0.459245
     H       0.465324      1.880214      -1.076448
     H       0.109175      2.419006       0.542606
     H       2.186733      1.212246       0.607498
     H       0.982718      0.178054       1.410801
     H      -2.726850     -1.817098       0.170634
Rotational constants (GHz):    4.4196600    1.5059900    1.1816000
Vibrational harmonic frequencies (cm-1):
       42.0257                  126.7007                  135.7249            
      206.3338                  235.5286                  286.2958            
      312.5589                  394.5795                  519.4377            
      621.7216                  802.1858                  879.4116            
      933.8539                  972.8706                  994.0134            
     1062.5462                 1111.2065                 1185.9560            
     1215.4124                 1235.8830                 1286.2828            
     1299.1804                 1353.5418                 1387.9902            
     1389.6808                 1417.4445                 1475.1009            
     1504.8745                 1790.0874                 3052.1121            
     3078.1940                 3091.5871                 3143.5744            
     3188.7776                 3190.6990                 3917.2498            
Zero-point correction (Hartree): 0.111267

HOCHCHCH2CH2OO.Ecppc
~~~~~~~~~~~~~~~~~~~~
E(UM062X/Aug-CC-pVTZ) (Hartree): -382.13947030 
Electronic state : 2-A
Cartesian coordinates (Angs):
     C      -1.529484     -0.302489       0.170987
     C      -1.034845      0.811980      -0.349991
     C       0.374698      1.300939      -0.188853
     C       1.232616      0.510313       0.773581
     O       1.481866     -0.830752       0.290517
     O       2.258116     -0.821903      -0.748450
     O      -2.804690     -0.750430       0.033491
     H      -0.945277     -0.991818       0.765712
     H      -1.686990      1.431986      -0.958476
     H       0.886349      1.319515      -1.154593
     H       0.364612      2.334302       0.167739
     H       2.203798      0.980548       0.914588
     H       0.745164      0.362278       1.736279
     H      -3.307907     -0.136598      -0.510058
Rotational constants (GHz):    4.9983100    1.4387300    1.2663800
Vibrational harmonic frequencies (cm-1):
       67.8308                  117.8662                  148.3515            
      204.1084                  269.3890                  314.1250            
      431.1025                  446.1421                  535.4174            
      625.5700                  811.4498                  862.5680            
      928.0912                  984.7397                  995.4913            
     1037.2588                 1118.6221                 1160.2299            
     1227.7424                 1248.8181                 1283.3823            
     1316.4783                 1350.1384                 1390.1106            
     1399.1873                 1413.6909                 1474.9318            
     1494.2587                 1766.1610                 3055.8556            
     3083.2992                 3099.4234                 3154.0351            
     3155.0453                 3223.1537                 3859.8894            
Zero-point correction (Hartree): 0.111753

HOCHCHCH2CH2OO.Ecppt
~~~~~~~~~~~~~~~~~~~~
E(UM062X/Aug-CC-pVTZ) (Hartree): -382.13802000 
Electronic state : 2-A
Cartesian coordinates (Angs):
     C      -1.529449     -0.270471       0.138609
     C      -1.022385      0.847727      -0.355323
     C       0.393919      1.310374      -0.189437
     C       1.239116      0.507328       0.773733
     O       1.461834     -0.842237       0.299354
     O       2.237854     -0.857438      -0.739800
     O      -2.840301     -0.599535      -0.051762
     H      -0.944052     -0.982245       0.709316
     H      -1.680273      1.480772      -0.939231
     H       0.906484      1.324864      -1.154913
     H       0.399687      2.343160       0.169092
     H       2.219956      0.958170       0.911539
     H       0.749641      0.373436       1.737641
     H      -3.013743     -1.474224       0.298727
Rotational constants (GHz):    4.9691000    1.4437000    1.2654800
Vibrational harmonic frequencies (cm-1):
       67.3447                  120.3136                  150.1679            
      197.9145                  232.0141                  293.8005            
      317.3200                  440.0979                  534.0222            
      625.9645                  814.0036                  865.5497            
      925.5620                  971.6286                  985.4511            
     1035.0411                 1118.1520                 1185.3130            
     1218.1745                 1229.5988                 1278.3390            
     1313.1957                 1355.4120                 1387.3704            
     1392.6868                 1407.0145                 1473.1566            
     1491.9981                 1788.7664                 3055.7378            
     3082.3562                 3098.1625                 3153.7357            
     3187.0484                 3189.4940                 3917.0116            
Zero-point correction (Hartree): 0.111400

HOCHCHCH2CH2OO.Ectpc
~~~~~~~~~~~~~~~~~~~~
E(UM062X/Aug-CC-pVTZ) (Hartree): -382.13938546 
Electronic state : 2-A
Cartesian coordinates (Angs):
     C       1.936312     -0.344147      -0.048058
     C       1.221437      0.766858       0.066513
     C      -0.268783      0.828034       0.220496
     C      -0.935101     -0.530449       0.227231
     O      -2.358621     -0.381508       0.409864
     O      -2.926371      0.085049      -0.659898
     O       3.285433     -0.418540      -0.190501
     H       1.502893     -1.335730      -0.039989
     H       1.740157      1.720866       0.048268
     H      -0.526798      1.344957       1.148427
     H      -0.706390      1.411545      -0.592537
     H      -0.780617     -1.069171      -0.707047
     H      -0.617071     -1.141356       1.070902
     H       3.661109      0.467113      -0.200841
Rotational constants (GHz):    9.8150100    0.9944200    0.9536900
Vibrational harmonic frequencies (cm-1):
       69.9008                  110.5973                  147.6182            
      162.2996                  271.1103                  322.2673            
      376.4266                  438.7931                  543.6010            
      669.5200                  774.6993                  854.3725            
      955.3967                  987.5271                  994.7808            
     1101.3430                 1108.4992                 1158.9623            
     1238.2333                 1253.1820                 1285.9201            
     1320.6570                 1340.1831                 1350.9176            
     1403.4472                 1422.6524                 1492.0627            
     1503.2176                 1766.7069                 3055.1602            
     3089.3721                 3090.7007                 3150.9597            
     3159.3541                 3214.6008                 3858.0659            
Zero-point correction (Hartree): 0.111728

HOCHCHCH2CH2OO.Ectpt
~~~~~~~~~~~~~~~~~~~~
E(UM062X/Aug-CC-pVTZ) (Hartree): -382.13741398 
Electronic state : 2-A
Cartesian coordinates (Angs):
     C       1.939941     -0.306288      -0.043998
     C       1.212318      0.795109       0.054537
     C      -0.277420      0.841180       0.204218
     C      -0.931955     -0.522116       0.240755
     O      -2.357334     -0.384119       0.418383
     O      -2.929968      0.042776      -0.665264
     O       3.297206     -0.251505      -0.178406
     H       1.511880     -1.302568      -0.024448
     H       1.733897      1.744451       0.023800
     H      -0.541629      1.377099       1.119589
     H      -0.719151      1.403362      -0.621714
     H      -0.772293     -1.080333      -0.681255
     H      -0.609342     -1.110884       1.098530
     H       3.660101     -1.135645      -0.245271
Rotational constants (GHz):    9.8556000    0.9914600    0.9518100
Vibrational harmonic frequencies (cm-1):
       68.2076                  106.6733                  144.7125            
      160.4354                  191.3743                  296.9736            
      323.3690                  370.0179                  543.0483            
      668.8520                  773.9917                  862.0336            
      949.6565                  970.6268                  991.1841            
     1100.9311                 1106.9279                 1182.2731            
     1219.8489                 1238.4636                 1285.5997            
     1318.8167                 1339.1135                 1355.0051            
     1384.0531                 1421.4667                 1490.5967            
     1501.8193                 1787.9223                 3055.0370            
     3087.8865                 3089.4569                 3148.9799            
     3179.5770                 3191.1718                 3919.9732            
Zero-point correction (Hartree): 0.111234

HOCHCHCH2CH2OO.Ecttc
~~~~~~~~~~~~~~~~~~~~
E(UM062X/Aug-CC-pVTZ) (Hartree): -382.13876938 
Point group : CS
Electronic state : 2-A"
Cartesian coordinates (Angs):
     C      -0.771975     -1.802408       0.000000
     C       0.515982     -1.485695       0.000000
     C       1.065624     -0.090714       0.000000
     C      -0.000000      0.979201       0.000000
     O       0.681606      2.250581       0.000000
     O      -0.157836      3.238907       0.000000
     O      -1.288633     -3.057915       0.000000
     H      -1.565508     -1.066926       0.000000
     H       1.246994     -2.288398       0.000000
     H       1.705699      0.056392       0.873368
     H       1.705699      0.056392      -0.873368
     H      -0.628043      0.945712      -0.890070
     H      -0.628043      0.945712       0.890070
     H      -0.575674     -3.703771       0.000000
Rotational constants (GHz):    9.0291200    0.9776300    0.8918700
Vibrational harmonic frequencies (cm-1):
       73.9734 (  A")           103.8979 (  A")           122.8267 (  A')     
      131.4241 (  A")           268.2891 (  A")           288.7826 (  A')     
      369.1405 (  A')           428.2408 (  A")           526.8094 (  A')     
      646.7481 (  A')           765.5339 (  A")           849.9082 (  A")     
      979.3574 (  A')           985.2831 (  A")          1031.1827 (  A')     
     1082.6697 (  A")          1125.1460 (  A')          1161.8411 (  A')     
     1227.6135 (  A")          1258.5921 (  A')          1296.4638 (  A')     
     1307.5496 (  A")          1331.8992 (  A')          1351.7050 (  A')     
     1404.0158 (  A')          1431.0892 (  A')          1498.7546 (  A')     
     1512.6102 (  A')          1765.5679 (  A')          3055.2827 (  A')     
     3083.1958 (  A')          3084.1565 (  A")          3140.6048 (  A")     
     3162.7702 (  A')          3218.6361 (  A')          3860.5767 (  A')     
Zero-point correction (Hartree): 0.111476

HOCHCHCH2CH2OO.Ecttt
~~~~~~~~~~~~~~~~~~~~
E(UM062X/Aug-CC-pVTZ) (Hartree): -382.13700871 
Point group : CS
Electronic state : 2-A"
Cartesian coordinates (Angs):
     C      -0.730667     -1.816974       0.000000
     C       0.550123     -1.482173       0.000000
     C       1.078835     -0.080256       0.000000
     C      -0.000000      0.976032       0.000000
     O       0.661347      2.258959       0.000000
     O      -0.193057      3.234275       0.000000
     O      -1.122947     -3.123534       0.000000
     H      -1.532954     -1.087177       0.000000
     H       1.278914     -2.283852       0.000000
     H       1.717525      0.073764       0.873326
     H       1.717525      0.073764      -0.873326
     H      -0.627193      0.934602      -0.890543
     H      -0.627193      0.934602       0.890543
     H      -2.079119     -3.183081       0.000000
Rotational constants (GHz):    9.0451300    0.9756500    0.8903900
Vibrational harmonic frequencies (cm-1):
       78.1147 (  A")           105.6336 (  A")           123.3877 (  A')     
      141.6512 (  A")           214.4010 (  A")           288.1418 (  A')     
      304.9511 (  A")           364.9563 (  A')           524.9464 (  A')     
      646.4276 (  A')           765.6786 (  A")           858.0770 (  A")     
      969.0092 (  A")           971.9698 (  A')          1029.4277 (  A')     
     1082.5480 (  A")          1124.5327 (  A')          1184.5187 (  A')     
     1224.9998 (  A')          1228.0631 (  A")          1296.3103 (  A')     
     1306.9655 (  A")          1329.6117 (  A')          1356.7021 (  A')     
     1384.6632 (  A')          1429.1669 (  A')          1497.5473 (  A')     
     1511.9850 (  A')          1787.3630 (  A')          3054.9617 (  A')     
     3080.6423 (  A')          3083.6770 (  A")          3137.9846 (  A")     
     3181.5268 (  A')          3193.1579 (  A')          3919.4957 (  A')     
Zero-point correction (Hartree): 0.111136

HOCHCHCH2CH2OO.Egppc
~~~~~~~~~~~~~~~~~~~~
E(CCSD(T)/Aug-CC-pVTZ) (Hartree): -381.59741321 
E(CCSD/Aug-CC-pVTZ) (Hartree): -381.53562656 
     T1 diagnostic:  0.021635 
E(MP2/Aug-CC-pVTZ) (Hartree): -381.49135115 
E(MP3/Aug-CC-pVTZ) (Hartree): -381.52284012 
E(PMP2/Aug-CC-pVTZ) (Hartree): -381.49450832 
E(PMP3/Aug-CC-pVTZ) (Hartree): -381.52470252 
E(PUHF/Aug-CC-pVTZ) (Hartree): -380.13366994 
E(UHF/Aug-CC-pVTZ) (Hartree): -380.12852112 
E(UM062X/Aug-CC-pVTZ) (Hartree): -382.14077322 
Electronic state : 2-A
Cartesian coordinates (Angs):
     C       1.710511     -0.236631       0.326987
     C       0.944346      0.767676      -0.075868
     C      -0.364970      1.093381       0.572448
     C      -1.559565      0.810304      -0.322689
     O      -1.648835     -0.595790      -0.641420
     O      -1.913557     -1.302412       0.413399
     O       2.897580     -0.615656      -0.206873
     H       1.435802     -0.870144       1.161279
     H       1.254587      1.369726      -0.925861
     H      -0.486348      0.518270       1.490682
     H      -0.411223      2.150053       0.846885
     H      -2.497548      1.093650       0.152897
     H      -1.469744      1.294969      -1.293789
     H       3.111038     -0.054046      -0.958204
Rotational constants (GHz):    4.8942000    1.4051200    1.2198500
Vibrational harmonic frequencies (cm-1):
       48.4327                   73.9465                  138.6868            
      203.0000                  282.0698                  338.0806            
      432.5349                  464.7401                  534.2373            
      576.6960                  817.7682                  871.9379            
      917.7207                  978.5767                  989.2948            
     1056.1982                 1130.6006                 1160.8082            
     1215.2377                 1261.8162                 1278.7131            
     1308.6740                 1341.0988                 1362.0063            
     1399.2443                 1409.4212                 1476.6644            
     1490.7193                 1764.6782                 3063.6467            
     3091.5359                 3117.6738                 3151.0787            
     3153.2238                 3205.8634                 3858.7646            
Zero-point correction (Hartree): 0.111551

HOCHCHCH2CH2OO.Egppt
~~~~~~~~~~~~~~~~~~~~
E(UM062X/Aug-CC-pVTZ) (Hartree): -382.13943708 
Electronic state : 2-A
Cartesian coordinates (Angs):
     C       1.687236     -0.201097       0.290896
     C       0.928303      0.817527      -0.079823
     C      -0.388725      1.111221       0.566132
     C      -1.573046      0.788725      -0.329917
     O      -1.625150     -0.623845      -0.632210
     O      -1.858347     -1.327385       0.431741
     O       2.875457     -0.478173      -0.312634
     H       1.391623     -0.864289       1.097960
     H       1.258737      1.441503      -0.902645
     H      -0.499833      0.540022       1.488258
     H      -0.463606      2.168069       0.832364
     H      -2.520100      1.052277       0.139199
     H      -1.491630      1.262981      -1.306601
     H       3.266520     -1.263601       0.072556
Rotational constants (GHz):    4.8400900    1.4303100    1.2324500
Vibrational harmonic frequencies (cm-1):
       47.9251                   75.1564                  145.3360            
      199.4227                  255.2148                  299.2435            
      337.1138                  454.6666                  532.7269            
      576.7199                  824.7387                  880.4943            
      914.9683                  965.1112                  979.4742            
     1051.9435                 1134.6384                 1179.6874            
     1207.3830                 1246.9137                 1270.9962            
     1304.0541                 1339.5274                 1365.6406            
     1395.8855                 1399.3995                 1477.7779            
     1490.5910                 1787.2229                 3065.8359            
     3092.1485                 3116.9292                 3153.6702            
     3169.3150                 3183.6903                 3915.4862            
Zero-point correction (Hartree): 0.111259

HOCHCHCH2CH2OO.Egptt
~~~~~~~~~~~~~~~~~~~~
E(UM062X/Aug-CC-pVTZ) (Hartree): -382.13810416 
Electronic state : 2-A
Cartesian coordinates (Angs):
     C       1.871289     -0.153176       0.329989
     C       1.054218      0.635267      -0.348775
     C      -0.127526      1.310639       0.274269
     C      -1.450685      0.761239      -0.222213
     O      -1.582532     -0.580829       0.295585
     O      -2.656826     -1.158544      -0.143306
     O       2.936654     -0.767166      -0.254017
     H       1.728227     -0.344927       1.388712
     H       1.232642      0.780890      -1.408353
     H      -0.094393      1.210822       1.360925
     H      -0.117389      2.380612       0.054960
     H      -2.303019      1.331426       0.145625
     H      -1.494215      0.695959      -1.308917
     H       3.386003     -1.326284       0.381331
Rotational constants (GHz):    5.3088800    1.2317300    1.0613900
Vibrational harmonic frequencies (cm-1):
       44.1585                   72.5962                  110.5274            
      188.9176                  240.8283                  278.9011            
      332.8114                  396.6938                  537.4121            
      566.3702                  818.6533                  871.5105            
      917.0749                  963.8968                 1031.6287            
     1067.3404                 1123.0761                 1179.5649            
     1205.2590                 1250.2644                 1276.6812            
     1299.0977                 1337.7871                 1364.5492            
     1392.9945                 1406.0468                 1473.0211            
     1500.3771                 1790.1720                 3062.0313            
     3083.9850                 3105.3708                 3142.0309            
     3170.7630                 3183.3007                 3917.6972            
Zero-point correction (Hartree): 0.110954

HOCHCHCH2CH2OO.Elmmc
~~~~~~~~~~~~~~~~~~~~
E(CCSD(T)/Aug-CC-pVTZ) (Hartree): -381.59783370 
E(CCSD/Aug-CC-pVTZ) (Hartree): -381.53613947 
     T1 diagnostic:  0.021613 
E(MP2/Aug-CC-pVTZ) (Hartree): -381.49167334 
E(MP3/Aug-CC-pVTZ) (Hartree): -381.52332066 
E(PMP2/Aug-CC-pVTZ) (Hartree): -381.49483364 
E(PMP3/Aug-CC-pVTZ) (Hartree): -381.52518461 
E(PUHF/Aug-CC-pVTZ) (Hartree): -380.13467350 
E(UHF/Aug-CC-pVTZ) (Hartree): -380.12952628 
E(UM062X/Aug-CC-pVTZ) (Hartree): -382.14119558 
Electronic state : 2-A
Cartesian coordinates (Angs):
     C       2.124153      0.276916      -0.042485
     C       0.874173     -0.099991      -0.272337
     C      -0.241856      0.871925      -0.502115
     C      -1.331538      0.777029       0.551962
     O      -1.920688     -0.543726       0.557753
     O      -2.625917     -0.751207      -0.511793
     O       3.188259     -0.535457       0.177972
     H       2.419325      1.318728      -0.015007
     H       0.628268     -1.157591      -0.294153
     H       0.142333      1.893574      -0.495348
     H      -0.708634      0.706852      -1.475186
     H      -0.933191      0.894050       1.558058
     H      -2.137311      1.487177       0.372899
     H       2.906379     -1.454950       0.147128
Rotational constants (GHz):    7.1870100    1.0976100    1.0399700
Vibrational harmonic frequencies (cm-1):
       56.8155                   83.9327                  145.6926            
      184.7958                  282.8152                  330.2073            
      441.3317                  475.5827                  532.5543            
      584.2154                  819.8312                  856.1046            
      908.1255                  989.8147                  997.8385            
     1093.6706                 1120.4717                 1158.1126            
     1207.1273                 1245.8661                 1294.7724            
     1306.4289                 1340.7014                 1365.5644            
     1394.4322                 1413.1006                 1474.5714            
     1489.2539                 1763.9730                 3068.0372            
     3093.6743                 3112.8341                 3158.6898            
     3163.9251                 3203.8754                 3858.7945            
Zero-point correction (Hartree): 0.111670

HOCHCHCH2CH2OO.Elmmt
~~~~~~~~~~~~~~~~~~~~
E(UM062X/Aug-CC-pVTZ) (Hartree): -382.13870637 
Electronic state : 2-A
Cartesian coordinates (Angs):
     C       2.125235      0.248322      -0.058651
     C       0.872717     -0.128232      -0.259321
     C      -0.238762      0.845137      -0.498006
     C      -1.328976      0.766348       0.557172
     O      -1.950491     -0.538911       0.551717
     O      -2.674554     -0.711942      -0.511242
     O       3.126265     -0.649485       0.162286
     H       2.416229      1.294412      -0.065456
     H       0.636743     -1.185922      -0.247669
     H       0.146936      1.866620      -0.504487
     H      -0.709261      0.670049      -1.467856
     H      -0.927013      0.865361       1.563809
     H      -2.117523      1.497240       0.384897
     H       3.962841     -0.194512       0.267517
Rotational constants (GHz):    7.4165000    1.0823000    1.0299300
Vibrational harmonic frequencies (cm-1):
       58.1094                   83.5004                  145.1692            
      179.0405                  261.2688                  283.6740            
      343.9772                  473.3522                  529.3861            
      579.8470                  819.7825                  865.7344            
      908.1426                  967.9874                  997.4035            
     1095.1717                 1120.2871                 1176.8371            
     1197.1457                 1237.6120                 1272.9478            
     1306.9577                 1339.9534                 1366.4940            
     1393.0371                 1401.3962                 1474.2716            
     1488.3671                 1786.6412                 3064.6038            
     3092.0681                 3109.0438                 3157.2482            
     3166.1291                 3193.1663                 3917.7310            
Zero-point correction (Hartree): 0.111296

HOCHCHCH2CH2OO.Elmpc
~~~~~~~~~~~~~~~~~~~~
E(UM062X/Aug-CC-pVTZ) (Hartree): -382.14045498 
Electronic state : 2-A
Cartesian coordinates (Angs):
     C       1.990995      0.290723       0.147957
     C       0.783071      0.146789      -0.378955
     C      -0.267488      1.210011      -0.300446
     C      -1.511384      0.771514       0.459024
     O      -2.173244     -0.296686      -0.251029
     O      -1.760532     -1.467795       0.130963
     O       2.994221     -0.622237       0.132025
     H       2.297937      1.195879       0.657647
     H       0.524123     -0.780504      -0.880382
     H       0.132568      2.092020       0.204050
     H      -0.576875      1.525457      -1.299715
     H      -1.276596      0.401779       1.454863
     H      -2.249624      1.570606       0.506442
     H       2.693745     -1.425720      -0.304047
Rotational constants (GHz):    5.3864800    1.3147700    1.1153500
Vibrational harmonic frequencies (cm-1):
       63.8294                   89.1137                  132.6084            
      185.0105                  288.9820                  340.3975            
      444.6962                  474.8875                  529.9831            
      562.1000                  845.9667                  860.7239            
      884.3868                  990.1286                 1016.3122            
     1084.0668                 1116.5833                 1160.1911            
     1213.2703                 1237.8761                 1291.0053            
     1322.3524                 1344.0177                 1370.2374            
     1386.2854                 1415.5074                 1472.7173            
     1485.0646                 1763.5710                 3057.6900            
     3092.6181                 3104.3023                 3161.1612            
     3167.6961                 3201.1436                 3857.5971            
Zero-point correction (Hartree): 0.111662

HOCHCHCH2CH2OO.Elmpt
~~~~~~~~~~~~~~~~~~~~
E(UM062X/Aug-CC-pVTZ) (Hartree): -382.13752742 
Electronic state : 2-A
Cartesian coordinates (Angs):
     C       1.989507      0.262297       0.130044
     C       0.777124      0.125563      -0.382394
     C      -0.261349      1.198630      -0.291182
     C      -1.508613      0.770590       0.468626
     O      -2.193658     -0.275300      -0.251268
     O      -1.812128     -1.459012       0.124798
     O       2.930095     -0.719142       0.038424
     H       2.295569      1.168905       0.643384
     H       0.522343     -0.800812      -0.883005
     H       0.147817      2.075144       0.216406
     H      -0.571089      1.522324      -1.287893
     H      -1.275494      0.383278       1.458211
     H      -2.231510      1.582752       0.531264
     H       3.737879     -0.446456       0.475440
Rotational constants (GHz):    5.4572000    1.2998800    1.1070100
Vibrational harmonic frequencies (cm-1):
       64.2559                   86.3268                  130.5274            
      178.1882                  258.9797                  287.9710            
      353.5359                  474.4244                  526.6953            
      558.9309                  844.4467                  871.0567            
      882.9824                  970.8423                 1018.2529            
     1084.6321                 1117.4167                 1179.0426            
     1201.6086                 1237.9409                 1264.4799            
     1319.0775                 1345.9730                 1370.6756            
     1385.7920                 1403.8346                 1472.6167            
     1484.7002                 1785.9588                 3055.0045            
     3090.6026                 3101.1149                 3159.7897            
     3162.9384                 3196.9708                 3918.7962            
Zero-point correction (Hartree): 0.111280

HOCHCHCH2CH2OO.Elmtc
~~~~~~~~~~~~~~~~~~~~
E(UM062X/Aug-CC-pVTZ) (Hartree): -382.14044555 
Electronic state : 2-A
Cartesian coordinates (Angs):
     C       2.175963      0.186009       0.179724
     C       0.978214      0.057207      -0.373761
     C      -0.069240      1.126498      -0.303036
     C      -1.324123      0.674537       0.417155
     O      -1.901820     -0.397832      -0.361864
     O      -2.954285     -0.892729       0.211247
     O       3.175990     -0.730064       0.170248
     H       2.475424      1.081714       0.710223
     H       0.723648     -0.859065      -0.897583
     H       0.322422      1.997960       0.224062
     H      -0.351103      1.458940      -1.304999
     H      -1.111008      0.276191       1.408134
     H      -2.073764      1.462124       0.484559
     H       2.890411     -1.518371      -0.301936
Rotational constants (GHz):    7.0870600    1.0463600    0.9597700
Vibrational harmonic frequencies (cm-1):
       49.5994                   90.3886                  116.2541            
      189.2059                  270.1401                  329.0272            
      396.3809                  452.8971                  546.4457            
      570.7131                  812.1939                  856.0773            
      929.8350                  991.5934                 1033.3265            
     1078.2671                 1125.6248                 1160.3652            
     1217.0645                 1246.0738                 1296.9406            
     1298.3373                 1341.4574                 1365.5075            
     1398.7018                 1414.1608                 1472.0318            
     1501.0744                 1763.3001                 3060.7044            
     3085.6154                 3109.2440                 3146.6216            
     3165.8735                 3201.7740                 3857.2177            
Zero-point correction (Hartree): 0.111494

HOCHCHCH2CH2OO.Elmtt
~~~~~~~~~~~~~~~~~~~~
E(UM062X/Aug-CC-pVTZ) (Hartree): -382.13798496 
Electronic state : 2-A
Cartesian coordinates (Angs):
     C       2.173117      0.167424       0.157258
     C       0.970963      0.041464      -0.381228
     C      -0.072376      1.111851      -0.290724
     C      -1.324757      0.656602       0.432221
     O      -1.926112     -0.388564      -0.364734
     O      -2.984436     -0.874250       0.205234
     O       3.112428     -0.815310       0.071604
     H       2.470110      1.065938       0.689801
     H       0.724771     -0.874854      -0.904278
     H       0.322664      1.978532       0.242455
     H      -0.361053      1.454522      -1.287458
     H      -1.105852      0.232019       1.411023
     H      -2.063330      1.451864       0.527200
     H       3.915968     -0.547075       0.519265
Rotational constants (GHz):    7.2581100    1.0369700    0.9544000
Vibrational harmonic frequencies (cm-1):
       51.3622                   91.4555                  114.8537            
      180.4182                  259.3054                  273.7506            
      340.7793                  398.9651                  541.7653            
      570.7578                  811.9286                  867.1642            
      927.9807                  970.4569                 1033.7417            
     1079.4163                 1128.4707                 1178.0868            
     1206.8534                 1237.1343                 1279.3676            
     1297.4922                 1339.9602                 1367.0724            
     1398.1003                 1403.2247                 1471.8138            
     1500.6779                 1786.2808                 3058.6410            
     3085.1347                 3105.6017                 3145.9876            
     3164.0356                 3195.5698                 3917.2662            
Zero-point correction (Hartree): 0.111131

HOCHCHCH2CH2OO.Elpmc
~~~~~~~~~~~~~~~~~~~~
E(UM062X/Aug-CC-pVTZ) (Hartree): -382.14031527 
Electronic state : 2-A
Cartesian coordinates (Angs):
     C      -1.716898      0.146092      -0.385021
     C      -0.768732      0.610804       0.416624
     C       0.428961      1.348511      -0.088900
     C       1.742575      0.638342       0.211557
     O       1.802244     -0.622303      -0.477781
     O       1.259329     -1.577483       0.218050
     O      -2.823031     -0.544588      -0.015065
     H      -1.686140      0.288376      -1.458048
     H      -0.834430      0.427859       1.485386
     H       0.348477      1.499505      -1.166609
     H       0.496962      2.339651       0.368448
     H       2.593005      1.204843      -0.164387
     H       1.864156      0.433781       1.274056
     H      -2.805809     -0.701510       0.933953
Rotational constants (GHz):    4.6279400    1.5523400    1.2629400
Vibrational harmonic frequencies (cm-1):
       62.2880                   96.0757                  108.9101            
      193.1536                  290.6709                  350.8344            
      422.9886                  466.9158                  540.3184            
      553.9728                  824.1871                  861.6162            
      942.6393                  983.8111                  993.8037            
     1040.3522                 1132.5951                 1164.1930            
     1225.5704                 1237.3195                 1280.0041            
     1318.0575                 1343.4109                 1360.5222            
     1394.6357                 1413.1371                 1473.5582            
     1485.7583                 1764.5370                 3051.7259            
     3091.9388                 3105.8278                 3154.9038            
     3159.3070                 3207.7406                 3860.3590            
Zero-point correction (Hartree): 0.111534

HOCHCHCH2CH2OO.Elpmt
~~~~~~~~~~~~~~~~~~~~
E(UM062X/Aug-CC-pVTZ) (Hartree): -382.13829904 
Electronic state : 2-A
Cartesian coordinates (Angs):
     C       1.679246      0.110683       0.354616
     C       0.765612      0.682938      -0.412719
     C      -0.448739      1.353033       0.142140
     C      -1.743553      0.626339      -0.199469
     O      -1.783544     -0.650949       0.461241
     O      -1.236397     -1.586352      -0.258257
     O       2.781777     -0.496873      -0.162806
     H       1.592392      0.106015       1.436620
     H       0.886845      0.636445      -1.488836
     H      -0.374506      1.436458       1.227989
     H      -0.541797      2.369393      -0.249760
     H      -2.611147      1.164789       0.178867
     H      -1.844907      0.444686      -1.267936
     H       3.283043     -0.922361       0.534221
Rotational constants (GHz):    4.5792500    1.5738300    1.2710500
Vibrational harmonic frequencies (cm-1):
       56.7528                   97.4223                  108.0751            
      185.1658                  241.9628                  299.6491            
      352.1428                  462.0451                  539.3009            
      549.7923                  828.6190                  865.8652            
      946.9980                  961.6997                  986.9639            
     1038.2792                 1136.0127                 1180.7630            
     1211.3605                 1235.3846                 1257.8402            
     1313.9456                 1340.3052                 1361.4416            
     1392.6747                 1399.1790                 1473.5968            
     1484.3704                 1787.1973                 3054.9106            
     3091.7525                 3103.3339                 3155.9447            
     3170.1119                 3189.6327                 3917.6516            
Zero-point correction (Hartree): 0.111125

HOCHCHCH2CH2OO.Elptc
~~~~~~~~~~~~~~~~~~~~
E(UM062X/Aug-CC-pVTZ) (Hartree): -382.13968393 
Electronic state : 2-A
Cartesian coordinates (Angs):
     C      -1.897069     -0.144664      -0.371056
     C      -1.056654      0.583217       0.350585
     C       0.114627      1.304085      -0.242630
     C       1.447573      0.762783       0.234917
     O       1.597683     -0.567063      -0.306902
     O       2.675606     -1.139922       0.129742
     O      -2.970820     -0.834603       0.085399
     H      -1.789832     -0.253802      -1.443022
     H      -1.197984      0.654553       1.425816
     H       0.080097      1.244268      -1.331847
     H       0.085634      2.364985       0.016705
     H       2.288937      1.353669      -0.125466
     H       1.498795      0.678604       1.320216
     H      -3.036259     -0.742095       1.040786
Rotational constants (GHz):    5.3681500    1.2172800    1.0551600
Vibrational harmonic frequencies (cm-1):
       47.1882                   74.8600                  110.7871            
      204.1682                  265.0175                  334.2196            
      391.4892                  446.2482                  540.5382            
      567.6268                  814.9271                  863.6201            
      917.8374                  988.6263                 1035.2476            
     1069.2262                 1122.3981                 1159.4625            
     1215.5601                 1267.2054                 1288.0298            
     1298.6105                 1341.6350                 1362.4937            
     1398.3535                 1414.8400                 1472.9430            
     1500.9427                 1766.3020                 3062.0597            
     3082.9820                 3106.9162                 3140.2931            
     3153.5250                 3208.4551                 3860.2757            
Zero-point correction (Hartree): 0.111391

HOCHCHCH2CH2OO.Eltmc
~~~~~~~~~~~~~~~~~~~~
E(CCSD(T)/Aug-CC-pVTZ) (Hartree): -381.59757712 
E(CCSD/Aug-CC-pVTZ) (Hartree): -381.53594843 
     T1 diagnostic:  0.021541 
E(MP2/Aug-CC-pVTZ) (Hartree): -381.49136426 
E(MP3/Aug-CC-pVTZ) (Hartree): -381.52330142 
E(PMP2/Aug-CC-pVTZ) (Hartree): -381.49452390 
E(PMP3/Aug-CC-pVTZ) (Hartree): -381.52516264 
E(PUHF/Aug-CC-pVTZ) (Hartree): -380.13519483 
E(UHF/Aug-CC-pVTZ) (Hartree): -380.13005206 
E(UM062X/Aug-CC-pVTZ) (Hartree): -382.14085582 
Electronic state : 2-A
Cartesian coordinates (Angs):
     C      -2.116996      0.458740       0.023049
     C      -1.201545     -0.458753       0.304944
     C       0.215959     -0.116171       0.646310
     C       1.167619     -0.590526      -0.439314
     O       2.539002     -0.357420      -0.056058
     O       2.828865      0.907518      -0.091009
     O      -3.413943      0.237036      -0.302756
     H      -1.893836      1.518356       0.037417
     H      -1.476744     -1.509855       0.279228
     H       0.330920      0.961839       0.759748
     H       0.510763     -0.579923       1.590163
     H       1.107798     -1.667516      -0.590321
     H       0.992433     -0.071408      -1.380229
     H      -3.592948     -0.708296      -0.307352
Rotational constants (GHz):   10.0368700    0.9316200    0.9000000
Vibrational harmonic frequencies (cm-1):
       62.6193                   86.0716                  114.6904            
      178.5780                  307.7151                  321.7048            
      372.5639                  446.0057                  522.6093            
      624.6712                  795.8463                  850.8975            
      958.7976                  991.0461                 1019.8069            
     1068.2658                 1129.2750                 1160.1231            
     1220.7535                 1266.9190                 1283.4531            
     1312.2745                 1329.5215                 1347.5466            
     1395.5665                 1412.2663                 1485.2413            
     1499.6656                 1761.8549                 3064.9628            
     3093.7449                 3118.4546                 3151.9409            
     3157.1601                 3205.8173                 3858.7043            
Zero-point correction (Hartree): 0.111578

HOCHCHCH2CH2OO.Eltmt
~~~~~~~~~~~~~~~~~~~~
E(UM062X/Aug-CC-pVTZ) (Hartree): -382.13929131 
Electronic state : 2-A
Cartesian coordinates (Angs):
     C      -2.116572      0.416829       0.046261
     C      -1.191134     -0.498223       0.288145
     C       0.220217     -0.150112       0.644152
     C       1.178600     -0.580618      -0.453727
     O       2.546494     -0.334731      -0.064552
     O       2.817275      0.934757      -0.071963
     O      -3.393009      0.084359      -0.290855
     H      -1.898587      1.478277       0.110791
     H      -1.466099     -1.544455       0.212146
     H       0.326348      0.924914       0.792302
     H       0.517839     -0.642064       1.572851
     H       1.135422     -1.653914      -0.632830
     H       0.995182     -0.039785      -1.380697
     H      -3.922847      0.874692      -0.404589
Rotational constants (GHz):   10.0574900    0.9318000    0.9003200
Vibrational harmonic frequencies (cm-1):
       62.7043                   88.0215                  115.2441            
      181.9248                  265.8166                  316.5343            
      323.3749                  385.1449                  520.7013            
      621.7596                  796.6855                  865.7763            
      956.6579                  970.6860                 1017.8475            
     1067.6172                 1133.8664                 1179.0186            
     1212.3615                 1246.3360                 1283.4095            
     1299.5434                 1330.5167                 1356.9055            
     1382.7914                 1407.6503                 1484.8791            
     1499.8352                 1785.0922                 3063.0106            
     3094.1621                 3115.4457                 3156.4935            
     3171.1139                 3181.9716                 3915.6844            
Zero-point correction (Hartree): 0.111303

HOCHCHCH2CH2OO.Eltpc
~~~~~~~~~~~~~~~~~~~~
E(CCSD(T)/Aug-CC-pVTZ) (Hartree): -381.59774833 
E(CCSD/Aug-CC-pVTZ) (Hartree): -381.53608544 
     T1 diagnostic:  0.021615 
E(MP2/Aug-CC-pVTZ) (Hartree): -381.49148884 
E(MP3/Aug-CC-pVTZ) (Hartree): -381.52339626 
E(PMP2/Aug-CC-pVTZ) (Hartree): -381.49466624 
E(PMP3/Aug-CC-pVTZ) (Hartree): -381.52527544 
E(PUHF/Aug-CC-pVTZ) (Hartree): -380.13522254 
E(UHF/Aug-CC-pVTZ) (Hartree): -380.13007016 
E(UM062X/Aug-CC-pVTZ) (Hartree): -382.14108463 
Electronic state : 2-A
Cartesian coordinates (Angs):
     C       2.234338      0.135592      -0.357583
     C       1.152266     -0.409745       0.181764
     C      -0.208548     -0.304048      -0.433368
     C      -1.139220      0.517425       0.443306
     O      -2.467277      0.557499      -0.118814
     O      -3.071055     -0.583770       0.015422
     O       3.496844      0.090426       0.134221
     H       2.198969      0.685380      -1.290008
     H       1.240777     -0.954326       1.118051
     H      -0.143183      0.158791      -1.418965
     H      -0.656921     -1.291129      -0.560283
     H      -1.221690      0.101001       1.446713
     H      -0.828505      1.559128       0.495662
     H       3.509436     -0.407433       0.957481
Rotational constants (GHz):   13.1446600    0.8826300    0.8713100
Vibrational harmonic frequencies (cm-1):
       67.8392                   71.8809                  132.1719            
      170.9503                  293.7329                  332.8483            
      372.3254                  440.9682                  536.2726            
      616.7591                  789.1311                  849.8083            
      973.1622                  989.9596                 1014.5884            
     1068.2345                 1126.4066                 1158.0426            
     1225.3138                 1255.7702                 1293.0913            
     1309.0186                 1331.2088                 1346.1744            
     1393.1945                 1412.4869                 1483.8683            
     1498.2063                 1764.3313                 3068.2706            
     3092.7231                 3113.9544                 3151.3558            
     3158.2694                 3205.3995                 3859.9303            
Zero-point correction (Hartree): 0.111557

HOCHCHCH2CH2OO.Eltpt
~~~~~~~~~~~~~~~~~~~~
E(UM062X/Aug-CC-pVTZ) (Hartree): -382.13930049 
Electronic state : 2-A
Cartesian coordinates (Angs):
     C      -2.230972      0.064200       0.344730
     C      -1.142923     -0.387317      -0.259035
     C       0.211479     -0.361046       0.375652
     C       1.147173      0.565479      -0.382958
     O       2.467725      0.545511       0.198395
     O       3.082314     -0.567691      -0.062484
     O      -3.453504      0.041539      -0.254464
     H      -2.198295      0.469898       1.351149
     H      -1.236164     -0.785712      -1.263260
     H       0.141500     -0.028243       1.412508
     H       0.660147     -1.356295       0.376634
     H       1.244648      0.273692      -1.427997
     H       0.830008      1.604246      -0.313275
     H      -4.122658      0.379656       0.342337
Rotational constants (GHz):   13.3164800    0.8817100    0.8703500
Vibrational harmonic frequencies (cm-1):
       68.0919                   72.1152                  131.6989            
      167.9317                  240.6208                  305.5826            
      330.2599                  384.9810                  534.3830            
      612.6315                  793.2149                  862.2344            
      970.0369                  973.8711                 1011.7579            
     1068.5068                 1129.8299                 1178.0602            
     1214.5548                 1242.4344                 1280.3932            
     1305.1409                 1331.0117                 1354.6634            
     1382.6060                 1408.1982                 1484.8761            
     1499.3454                 1785.4662                 3065.4744            
     3093.5087                 3110.7624                 3157.8435            
     3168.6656                 3184.8947                 3916.5030            
Zero-point correction (Hartree): 0.111225

HOCHCHCH2CH2OO.Elttc
~~~~~~~~~~~~~~~~~~~~
E(UM062X/Aug-CC-pVTZ) (Hartree): -382.14004222 
Electronic state : 2-A
Cartesian coordinates (Angs):
     C      -2.275809      0.148690      -0.367891
     C      -1.260724      0.112279       0.484643
     C       0.071423      0.733498       0.193929
     C       1.150763     -0.325924       0.094412
     O       2.412869      0.349900      -0.093776
     O       3.395681     -0.491871      -0.180792
     O      -3.506287     -0.390315      -0.187617
     H      -2.204780      0.644611      -1.328060
     H      -1.382734     -0.396042       1.437314
     H       0.028218      1.293552      -0.740915
     H       0.348530      1.438096       0.981051
     H       1.231526     -0.919900       1.004892
     H       0.998327     -0.988116      -0.756826
     H      -3.551102     -0.825174       0.669474
Rotational constants (GHz):   13.6874400    0.8329600    0.8191700
Vibrational harmonic frequencies (cm-1):
       60.8092                   90.3699                   93.3198            
      165.2775                  280.7597                  313.8347            
      355.1919                  453.9746                  528.9095            
      593.7630                  785.7557                  851.2485            
      989.6390                  993.0427                 1029.7627            
     1104.1590                 1122.0018                 1159.0048            
     1206.0828                 1269.0806                 1294.2590            
     1309.3283                 1318.2802                 1346.6675            
     1397.3583                 1419.6101                 1490.8330            
     1507.2386                 1765.0976                 3063.5670            
     3084.8968                 3108.9567                 3144.2032            
     3154.2420                 3207.2976                 3859.5147            
Zero-point correction (Hartree): 0.111442

HOCHCHCH2CH2OO.Elttt
~~~~~~~~~~~~~~~~~~~~
E(UM062X/Aug-CC-pVTZ) (Hartree): -382.13833875 
Electronic state : 2-A
Cartesian coordinates (Angs):
     C      -2.273429      0.105513      -0.345910
     C      -1.250519      0.154109       0.492492
     C       0.075477      0.744656       0.126087
     C       1.158404     -0.315660       0.135892
     O       2.416046      0.340116      -0.137218
     O       3.400500     -0.503981      -0.153931
     O      -3.469088     -0.443689       0.003341
     H      -2.206311      0.507793      -1.351936
     H      -1.375714     -0.260890       1.486384
     H       0.027645      1.201252      -0.863577
     H       0.354735      1.529938       0.832104
     H       1.248309     -0.804624       1.105828
     H       1.003251     -1.068940      -0.635313
     H      -4.091178     -0.375805      -0.722381
Rotational constants (GHz):   13.8484500    0.8326000    0.8185100
Vibrational harmonic frequencies (cm-1):
       57.7469                   90.3574                  103.0039            
      158.1623                  229.2563                  299.1034            
      314.3737                  359.8705                  526.9658            
      590.0482                  784.7093                  863.0777            
      967.4995                  986.9136                 1029.3380            
     1103.2365                 1124.1121                 1179.2551            
     1199.0412                 1244.0592                 1293.4717            
     1302.6613                 1312.7888                 1355.5095            
     1382.0788                 1415.5474                 1491.3168            
     1507.2022                 1788.3995                 3061.7607            
     3086.0660                 3106.1688                 3145.2990            
     3169.8118                 3184.8758                 3916.9350            
Zero-point correction (Hartree): 0.111015


TS.HOCHCHCH2CH2OO.cycHOCHCHCH2CH2OO.Ec.b
~~~~~~~~~~~~~~~~~~~~~~~~~~~~~~~~~~~~~~~~
E(UM062X/Aug-CC-pVTZ) (Hartree): -382.10724016 
Electronic state : 2-A
Cartesian coordinates (Angs):
     C       1.217486      0.279742       0.364305
     C       0.341773      1.097742      -0.320596
     C      -1.027092      1.246613       0.229747
     C      -1.844235     -0.064593      -0.045476
     O      -0.992753     -1.095210      -0.485394
     O       0.005605     -1.255843       0.439528
     O       2.391428     -0.139894      -0.136307
     H       1.213890      0.247341       1.445253
     H       0.518331      1.286381      -1.373712
     H      -0.974047      1.394725       1.307886
     H      -1.549034      2.096788      -0.204608
     H      -2.361650     -0.370132       0.865237
     H      -2.563582      0.066706      -0.852405
     H       2.354263     -0.151259      -1.098142
Rotational constants (GHz):    4.7724200    2.2768000    1.7445200
Vibrational harmonic frequencies (cm-1):
     i685.0331                   79.5739                  248.9258            
      266.7727                  368.0530                  402.7393            
      421.1075                  441.7393                  542.8748            
      651.4000                  781.5885                  819.2272            
      891.5753                  903.7398                  977.2995            
     1039.4828                 1100.8839                 1133.4693            
     1159.3361                 1225.4296                 1268.0599            
     1279.5097                 1296.2485                 1321.3174            
     1371.2509                 1405.3781                 1487.8162            
     1504.3742                 1563.6009                 3068.4393            
     3087.8182                 3127.3766                 3146.3952            
     3173.8162                 3211.4429                 3854.2426            
Zero-point correction (Hartree): 0.110770

TS.HOCHCHCH2CH2OO.cycHOCHCHCH2CH2OO.Ec
~~~~~~~~~~~~~~~~~~~~~~~~~~~~~~~~~~~~~~
E(CCSD(T)/Aug-CC-pVTZ) (Hartree): -381.57644612 
E(CCSD/Aug-CC-pVTZ) (Hartree): -381.50999223 
     T1 diagnostic:  0.028421 
E(MP2/Aug-CC-pVTZ) (Hartree): -381.46077651 
E(MP3/Aug-CC-pVTZ) (Hartree): -381.49072084 
E(PMP2/Aug-CC-pVTZ) (Hartree): -381.47834524 
E(PMP3/Aug-CC-pVTZ) (Hartree): -381.50387730 
E(PUHF/Aug-CC-pVTZ) (Hartree): -380.10921509 
E(UHF/Aug-CC-pVTZ) (Hartree): -380.08883155 
E(UM062X/Aug-CC-pVTZ) (Hartree): -382.11687402 
Electronic state : 2-A
Cartesian coordinates (Angs):
     C       1.155879      0.174702       0.396882
     C       0.378016      1.143937      -0.200909
     C      -1.050426      1.263609       0.187134
     C      -1.791931     -0.024462      -0.246750
     O      -1.122666     -1.127408       0.316294
     O       0.084327     -1.281446      -0.319510
     O       2.404324     -0.122337       0.004603
     H       0.959046     -0.158255       1.406366
     H       0.705464      1.550892      -1.151471
     H      -1.160467      1.353572       1.268525
     H      -1.521335      2.128324      -0.278811
     H      -2.806017     -0.050121       0.151243
     H      -1.807149     -0.117482      -1.333491
     H       2.553350      0.195881      -0.891592
Rotational constants (GHz):    4.8099700    2.3018300    1.7081900
Vibrational harmonic frequencies (cm-1):
     i612.2148                  155.8931                  259.5245            
      308.9601                  339.9696                  400.6085            
      432.1901                  440.3496                  541.4172            
      590.7723                  747.5627                  862.9943            
      933.5439                  972.9901                  987.3404            
     1024.8407                 1090.4612                 1128.1823            
     1165.3542                 1214.9112                 1262.3010            
     1277.6477                 1318.6330                 1327.6199            
     1367.9829                 1403.7461                 1484.0993            
     1488.6522                 1571.1142                 3073.6098            
     3076.3357                 3128.1857                 3139.6010            
     3172.6958                 3222.8911                 3853.6386            
Zero-point correction (Hartree): 0.111099

TS.HOCHCHCH2CH2OO.cycHOCHCHCH2CH2OO.Et.b
~~~~~~~~~~~~~~~~~~~~~~~~~~~~~~~~~~~~~~~~
E(UM062X/Aug-CC-pVTZ) (Hartree): -382.10677807 
Electronic state : 2-A
Cartesian coordinates (Angs):
     C       1.214263      0.289700       0.332681
     C       0.326195      1.114648      -0.316324
     C      -1.033088      1.235463       0.261697
     C      -1.845033     -0.070021      -0.053565
     O      -0.991057     -1.100931      -0.491333
     O       0.004584     -1.260867       0.433509
     O       2.353683     -0.063418      -0.294347
     H       1.212212      0.218401       1.414086
     H       0.498114      1.324250      -1.363766
     H      -0.967915      1.341177       1.344097
     H      -1.571161      2.095330      -0.132183
     H      -2.385987     -0.385297       0.840440
     H      -2.544451      0.076333      -0.875285
     H       2.847487     -0.687210       0.243044
Rotational constants (GHz):    4.7508600    2.2809700    1.7416400
Vibrational harmonic frequencies (cm-1):
     i672.3229                   91.4225                  248.4742            
      275.6830                  318.7083                  368.7678            
      416.8751                  431.7870                  540.0841            
      655.4871                  795.1183                  823.1929            
      885.9184                  903.5206                  972.9894            
     1036.2457                 1094.7108                 1133.0696            
     1177.5571                 1217.2911                 1251.4219            
     1276.5256                 1297.2793                 1318.4758            
     1357.5098                 1390.8892                 1487.3773            
     1503.7334                 1588.4282                 3065.0986            
     3087.2872                 3126.5789                 3145.9153            
     3174.3288                 3205.5509                 3893.7939            
Zero-point correction (Hartree): 0.110621

TS.HOCHCHCH2CH2OO.cycHOCHCHCH2CH2OO.Et
~~~~~~~~~~~~~~~~~~~~~~~~~~~~~~~~~~~~~~
E(CCSD(T)/Aug-CC-pVTZ) (Hartree): -381.57685956 
E(CCSD/Aug-CC-pVTZ) (Hartree): -381.51053770 
     T1 diagnostic:  0.028927 
E(MP2/Aug-CC-pVTZ) (Hartree): -381.46051972 
E(MP3/Aug-CC-pVTZ) (Hartree): -381.49081210 
E(PMP2/Aug-CC-pVTZ) (Hartree): -381.47833678 
E(PMP3/Aug-CC-pVTZ) (Hartree): -381.50423593 
E(PUHF/Aug-CC-pVTZ) (Hartree): -380.11048561 
E(UHF/Aug-CC-pVTZ) (Hartree): -380.08990202 
E(UM062X/Aug-CC-pVTZ) (Hartree): -382.11743003 
Electronic state : 2-A
Cartesian coordinates (Angs):
     C       1.147043      0.214569       0.362170
     C       0.350660      1.166516      -0.223427
     C      -1.071962      1.255057       0.192903
     C      -1.791056     -0.052670      -0.223763
     O      -1.091404     -1.144407       0.327652
     O       0.098491     -1.285160      -0.343113
     O       2.388067      0.005591      -0.115672
     H       0.939296     -0.138660       1.365124
     H       0.673943      1.583833      -1.167781
     H      -1.167356      1.347532       1.275518
     H      -1.573728      2.104419      -0.268728
     H      -2.797301     -0.098079       0.192044
     H      -1.822870     -0.148961      -1.309517
     H       2.778671     -0.759101       0.315106
Rotational constants (GHz):    4.7651800    2.3156100    1.7036200
Vibrational harmonic frequencies (cm-1):
     i590.6847                  159.4186                  269.6552            
      294.5891                  342.8123                  374.2063            
      399.9901                  435.6672                  538.4892            
      595.4815                  773.5039                  860.5234            
      934.0770                  971.0382                  982.5272            
     1020.8763                 1084.1233                 1128.2875            
     1182.8838                 1208.9500                 1256.2854            
     1265.7570                 1319.9350                 1332.9792            
     1358.1819                 1384.0530                 1483.8822            
     1488.5767                 1600.3175                 3075.6803            
     3076.1514                 3129.3890                 3140.5615            
     3185.3172                 3208.4006                 3884.7204            
Zero-point correction (Hartree): 0.111054


#################################################################################
Z-HOCH=CHCH2CH2OO ring closure
#################################################################################

HOCHCHCH2CH2OO.Zcptt
~~~~~~~~~~~~~~~~~~~~
E(UM062X/Aug-CC-pVTZ) (Hartree): -382.13711336 
Electronic state : 2-A
Cartesian coordinates (Angs):
     C      -1.776794     -0.554659      -0.256263
     C      -1.493800      0.732244      -0.393931
     C      -0.341202      1.507229       0.179422
     C       0.865022      0.702094       0.611509
     O       1.362636      0.001504      -0.550034
     O       2.306136     -0.829333      -0.236274
     O      -1.045956     -1.415474       0.509502
     H      -2.641959     -0.983117      -0.748092
     H      -2.189973      1.293835      -1.001782
     H      -0.017457      2.242074      -0.560669
     H      -0.672659      2.085016       1.047217
     H       1.667247      1.352616       0.959066
     H       0.637097     -0.043564       1.366069
     H      -1.284185     -2.321888       0.308221
Rotational constants (GHz):    3.9278800    2.0404800    1.5310900
Vibrational harmonic frequencies (cm-1):
       45.9236                   64.9179                  135.0800            
      247.0910                  265.4998                  269.3807            
      385.3755                  449.8302                  535.0364            
      742.0012                  759.3706                  851.3365            
      877.4570                  975.0962                 1014.7206            
     1055.0647                 1080.1995                 1130.9052            
     1232.4978                 1259.8112                 1284.3392            
     1303.6282                 1317.0023                 1385.4671            
     1420.2666                 1446.4422                 1472.3424            
     1505.9929                 1788.8382                 3052.2248            
     3086.2696                 3096.1607                 3178.5278            
     3182.7917                 3214.4693                 3910.7664            
Zero-point correction (Hartree): 0.111681

HOCHCHCH2CH2OO.Zctpt
~~~~~~~~~~~~~~~~~~~~
E(UM062X/Aug-CC-pVTZ) (Hartree): -382.13858979 
Electronic state : 2-A
Cartesian coordinates (Angs):
     C       2.258555      0.186620      -0.159502
     C       1.324382      1.115087      -0.020896
     C      -0.138910      0.947789       0.264829
     C      -0.670348     -0.470054       0.176316
     O      -2.097451     -0.455162       0.413555
     O      -2.742614      0.049252      -0.592871
     O       2.019007     -1.155385      -0.046563
     H       3.284895      0.462810      -0.367898
     H       1.671553      2.134578      -0.122294
     H      -0.365199      1.344959       1.258467
     H      -0.708414      1.553057      -0.443552
     H      -0.503577     -0.913031      -0.802703
     H      -0.273150     -1.120533       0.949555
     H       2.820279     -1.648133      -0.229019
Rotational constants (GHz):    6.2539000    1.3314300    1.1658700
Vibrational harmonic frequencies (cm-1):
       21.5428                   88.9392                  136.3872            
      180.6831                  222.3307                  282.7500            
      372.7885                  454.7840                  567.1876            
      745.0536                  765.6149                  806.7722            
      929.2624                  975.1060                  977.1411            
     1054.0019                 1098.4514                 1128.5862            
     1236.7695                 1247.2451                 1290.1310            
     1310.8892                 1328.5947                 1348.8740            
     1422.8371                 1441.6560                 1484.8573            
     1496.2722                 1791.5757                 3050.7558            
     3091.2172                 3117.6643                 3185.2642            
     3187.6863                 3213.3065                 3917.4230            
Zero-point correction (Hartree): 0.111563

HOCHCHCH2CH2OO.Zcttc
~~~~~~~~~~~~~~~~~~~~
E(UM062X/Aug-CC-pVTZ) (Hartree): -382.13442233 
Point group : CS
Electronic state : 2-A"
Cartesian coordinates (Angs):
     C      -0.377205     -2.307271       0.000000
     C       0.796415     -1.684238       0.000000
     C       1.154718     -0.224566       0.000000
     C      -0.000000      0.750786       0.000000
     O       0.571304      2.076013       0.000000
     O      -0.349166      2.989418       0.000000
     O      -1.641430     -1.809192       0.000000
     H      -0.408505     -3.388123       0.000000
     H       1.648626     -2.350758       0.000000
     H       1.777089     -0.010247       0.872495
     H       1.777089     -0.010247      -0.872495
     H      -0.617134      0.675760      -0.897332
     H      -0.617134      0.675760       0.897332
     H      -1.649264     -0.850327       0.000000
Rotational constants (GHz):    5.8449000    1.2754700    1.0608800
Vibrational harmonic frequencies (cm-1):
       43.1149 (  A")            81.4073 (  A")           129.0539 (  A')     
      149.1265 (  A")           268.3374 (  A')           311.4776 (  A")     
      379.5594 (  A')           482.1220 (  A")           508.2954 (  A')     
      751.1183 (  A")           767.0594 (  A')           814.7686 (  A")     
      913.8562 (  A')          1003.6698 (  A")          1031.8930 (  A')     
     1073.4671 (  A')          1088.9370 (  A")          1145.5511 (  A')     
     1230.7542 (  A')          1253.1947 (  A")          1290.3416 (  A')     
     1317.5934 (  A")          1342.4242 (  A')          1362.1290 (  A')     
     1427.3542 (  A')          1444.3698 (  A')          1497.6006 (  A')     
     1532.5811 (  A')          1767.2677 (  A')          3052.1786 (  A')     
     3061.3874 (  A')          3082.0577 (  A")          3121.4614 (  A")     
     3196.9164 (  A')          3224.9995 (  A')          3910.9139 (  A')     
Zero-point correction (Hartree): 0.111763

HOCHCHCH2CH2OO.Zcttt
~~~~~~~~~~~~~~~~~~~~
E(UM062X/Aug-CC-pVTZ) (Hartree): -382.13769930 
Point group : CS
Electronic state : 2-A"
Cartesian coordinates (Angs):
     C      -0.410643     -2.264632       0.000000
     C       0.790060     -1.705198       0.000000
     C       1.158136     -0.250913       0.000000
     C       0.000000      0.723795       0.000000
     O       0.595745      2.042813       0.000000
     O      -0.306243      2.973965       0.000000
     O      -1.579759     -1.557348       0.000000
     H      -0.514846     -3.342783       0.000000
     H       1.619897     -2.399009       0.000000
     H       1.783976     -0.042358       0.871782
     H       1.783976     -0.042358      -0.871782
     H      -0.624334      0.644558      -0.886550
     H      -0.624334      0.644558       0.886550
     H      -2.327588     -2.156356       0.000000
Rotational constants (GHz):    5.8453500    1.3275400    1.0964700
Vibrational harmonic frequencies (cm-1):
       17.2363 (  A")            78.2270 (  A")           128.1975 (  A")     
      138.3477 (  A')           253.4598 (  A')           270.7581 (  A")     
      380.3751 (  A')           456.1568 (  A")           510.4761 (  A')     
      745.6136 (  A")           770.0082 (  A')           803.5707 (  A")     
      930.3358 (  A')           978.1798 (  A")          1016.3361 (  A')     
     1069.1464 (  A')          1076.6634 (  A")          1144.0290 (  A')     
     1221.3629 (  A")          1252.0845 (  A')          1299.7341 (  A')     
     1314.2764 (  A')          1315.9130 (  A")          1340.0882 (  A')     
     1428.7474 (  A')          1443.9492 (  A')          1493.9967 (  A')     
     1503.7163 (  A')          1792.5665 (  A')          3051.8416 (  A')     
     3079.8236 (  A")          3111.9295 (  A')          3171.9629 (  A")     
     3187.6752 (  A')          3213.1564 (  A')          3916.7245 (  A')     
Zero-point correction (Hartree): 0.111418

HOCHCHCH2CH2OO.Zgpmc
~~~~~~~~~~~~~~~~~~~~
E(UM062X/Aug-CC-pVTZ) (Hartree): -382.14139996 
Electronic state : 2-A
Cartesian coordinates (Angs):
     C      -1.737468     -0.146900       0.370704
     C      -0.997116      0.936025       0.587248
     C       0.077260      1.427802      -0.337557
     C       1.434514      0.783067      -0.094846
     O       1.333949     -0.627424      -0.393721
     O       1.297258     -1.365867       0.677108
     O      -1.644538     -0.999462      -0.676321
     H      -2.531448     -0.435613       1.045857
     H      -1.192722      1.491430       1.493099
     H      -0.201334      1.255270      -1.380993
     H       0.200699      2.505915      -0.228546
     H       2.192512      1.171852      -0.773936
     H       1.761229      0.867044       0.938717
     H      -0.785432     -0.913843      -1.104020
Rotational constants (GHz):    3.6140200    2.2889700    1.7079300
Vibrational harmonic frequencies (cm-1):
       58.2574                   93.1132                  123.1605            
      232.3401                  265.0035                  361.0549            
      456.4881                  524.6469                  582.7744            
      657.9690                  761.3718                  837.5371            
      919.5851                  981.6888                  992.3137            
     1035.9988                 1083.2694                 1141.7043            
     1223.1119                 1228.6007                 1276.7832            
     1312.6929                 1350.0219                 1370.6682            
     1383.0603                 1438.3066                 1483.6831            
     1488.0368                 1742.8540                 3054.4239            
     3091.7480                 3110.0397                 3163.6564            
     3210.9156                 3231.1092                 3838.7502            
Zero-point correction (Hartree): 0.111873

HOCHCHCH2CH2OO.Zgppt
~~~~~~~~~~~~~~~~~~~~
E(UM062X/Aug-CC-pVTZ) (Hartree): -382.13954204 
Electronic state : 2-A
Cartesian coordinates (Angs):
     C       1.914859      0.090571      -0.431387
     C       0.985666      1.025018      -0.298066
     C      -0.116046      0.973688       0.714388
     C      -1.485281      0.843125       0.071006
     O      -1.596557     -0.397079      -0.661614
     O      -1.635879     -1.415766       0.141001
     O       1.969504     -0.998001       0.385586
     H       2.684108      0.156570      -1.191408
     H       1.022074      1.860050      -0.985306
     H       0.028552      0.133836       1.392152
     H      -0.126916      1.885411       1.316826
     H      -2.284305      0.853205       0.810695
     H      -1.659541      1.610620      -0.682013
     H       2.644287     -1.607334       0.083620
Rotational constants (GHz):    4.1422700    1.8180600    1.4550000
Vibrational harmonic frequencies (cm-1):
       28.3230                   59.2797                  144.7891            
      214.5535                  252.6226                  295.0937            
      378.7974                  519.7864                  568.4510            
      668.2856                  766.4669                  861.6718            
      890.9170                  973.7082                  995.9278            
     1047.5808                 1076.0585                 1148.4667            
     1215.0584                 1257.7825                 1277.3019            
     1296.0053                 1313.5432                 1357.1520            
     1398.7465                 1444.7125                 1481.0926            
     1490.7725                 1785.2217                 3064.5679            
     3089.8000                 3132.9715                 3151.1366            
     3184.5111                 3210.8037                 3919.8909            
Zero-point correction (Hartree): 0.111543

HOCHCHCH2CH2OO.Zgptc
~~~~~~~~~~~~~~~~~~~~
E(UM062X/Aug-CC-pVTZ) (Hartree): -382.14241976 
Electronic state : 2-A
Cartesian coordinates (Angs):
     C       1.897914     -0.385648      -0.365766
     C       1.383603      0.840262      -0.401496
     C       0.264452      1.332044       0.474141
     C      -1.122747      0.977069      -0.024651
     O      -1.262451     -0.455486       0.137606
     O      -2.386318     -0.899974      -0.330991
     O       1.496806     -1.417339       0.410545
     H       2.743478     -0.659416      -0.982587
     H       1.826601      1.532954      -1.102642
     H       0.369226      0.941970       1.491084
     H       0.315083      2.417337       0.557387
     H      -1.913850      1.441070       0.563359
     H      -1.261010      1.196692      -1.081776
     H       0.596840     -1.270578       0.724538
Rotational constants (GHz):    4.0906500    1.8775300    1.4146100
Vibrational harmonic frequencies (cm-1):
       68.9838                   87.6903                  136.6126            
      229.9296                  265.9066                  335.7055            
      440.9411                  503.4870                  609.9387            
      656.8277                  765.8418                  844.7707            
      899.0257                  994.9890                 1024.7678            
     1053.7330                 1087.6190                 1138.3086            
     1222.6732                 1254.0154                 1290.0043            
     1295.5010                 1353.6839                 1378.2692            
     1396.6054                 1439.7699                 1481.4740            
     1500.2293                 1746.2514                 3053.1188            
     3087.8198                 3118.3686                 3150.7968            
     3205.2596                 3225.7012                 3823.1965            
Zero-point correction (Hartree): 0.112013

HOCHCHCH2CH2OO.Zgtmt
~~~~~~~~~~~~~~~~~~~~
E(UM062X/Aug-CC-pVTZ) (Hartree): -382.14019926 
Electronic state : 2-A
Cartesian coordinates (Angs):
     C       2.270326     -0.081809       0.116109
     C       1.368345     -1.008545      -0.173754
     C      -0.033049     -0.679805      -0.596835
     C      -0.912228     -0.443690       0.621475
     O      -2.280375     -0.204704       0.228308
     O      -2.418909      0.964599      -0.318224
     O       1.972686      1.245837       0.034722
     H       3.276542     -0.331255       0.429921
     H       1.665202     -2.041996      -0.067885
     H      -0.047455      0.226657      -1.201609
     H      -0.455768     -1.491488      -1.188285
     H      -0.964202     -1.321549       1.263055
     H      -0.572122      0.420624       1.189408
     H       2.750225      1.776249       0.214973
Rotational constants (GHz):    5.5989900    1.3520200    1.1808600
Vibrational harmonic frequencies (cm-1):
       43.3704                   65.7348                  120.2632            
      202.9634                  257.3635                  286.3124            
      355.0370                  527.0481                  572.4761            
      679.5690                  764.8308                  817.1081            
      959.4980                  972.6762                  985.8933            
     1066.5337                 1079.6370                 1137.5424            
     1223.2900                 1259.5267                 1290.9339            
     1294.5599                 1306.4462                 1335.8659            
     1399.4687                 1434.0395                 1485.8825            
     1502.2942                 1772.3973                 3082.3660            
     3098.7856                 3130.6060                 3162.4014            
     3191.4227                 3226.1186                 3915.6145            
Zero-point correction (Hartree): 0.111644

HOCHCHCH2CH2OO.Zgtpc
~~~~~~~~~~~~~~~~~~~~
E(UM062X/Aug-CC-pVTZ) (Hartree): -382.14075752 
Electronic state : 2-A
Cartesian coordinates (Angs):
     C      -2.374942      0.337594       0.155917
     C      -1.213663      0.969303       0.026282
     C       0.051787      0.353347      -0.491740
     C       0.940906     -0.095044       0.658214
     O       2.162758     -0.680760       0.162951
     O       2.948064      0.222433      -0.339989
     O      -2.645564     -0.950933      -0.168538
     H      -3.253375      0.830196       0.548466
     H      -1.180539      2.000982       0.346920
     H      -0.142237     -0.503852      -1.142065
     H       0.609705      1.072998      -1.090594
     H       1.211162      0.739468       1.303249
     H       0.474510     -0.883184       1.247021
     H      -1.865818     -1.373723      -0.540433
Rotational constants (GHz):    7.9091100    1.1060900    1.0406700
Vibrational harmonic frequencies (cm-1):
       27.6412                   67.0647                  124.0091            
      202.9161                  276.6980                  353.9663            
      400.0936                  544.5398                  578.0624            
      659.8564                  773.9056                  803.7664            
      971.0301                  980.5378                  995.6468            
     1062.8364                 1078.2751                 1139.3897            
     1219.6081                 1248.4100                 1274.1562            
     1303.1465                 1327.5545                 1348.3426            
     1397.1146                 1436.2636                 1488.9787            
     1512.6791                 1754.1465                 3055.7317            
     3094.2064                 3114.3684                 3156.7534            
     3212.0556                 3233.4812                 3862.2667            
Zero-point correction (Hartree): 0.111811

HOCHCHCH2CH2OO.Zgtpt
~~~~~~~~~~~~~~~~~~~~
E(UM062X/Aug-CC-pVTZ) (Hartree): -382.14074793 
Electronic state : 2-A
Cartesian coordinates (Angs):
     C      -2.324227      0.311436       0.177412
     C      -1.219788      1.035274       0.068940
     C       0.059043      0.494489      -0.498552
     C       0.866340     -0.199202       0.587154
     O       2.103565     -0.717299       0.053086
     O       2.945104      0.237649      -0.200539
     O      -2.363701     -0.988806      -0.234841
     H      -3.239998      0.710018       0.596257
     H      -1.251137      2.050569       0.437250
     H      -0.153083     -0.226551      -1.288160
     H       0.664985      1.295553      -0.919357
     H       1.120232      0.478128       1.401064
     H       0.342422     -1.072435       0.970777
     H      -3.251384     -1.339617      -0.149199
Rotational constants (GHz):    7.5430100    1.1750500    1.0826100
Vibrational harmonic frequencies (cm-1):
       24.4640                   68.1809                  125.1362            
      203.0655                  252.2195                  270.6904            
      363.9977                  526.6943                  578.7486            
      676.4526                  766.1211                  809.5074            
      966.7978                  974.4646                  988.3892            
     1065.2591                 1078.1403                 1135.2163            
     1225.4347                 1262.0164                 1288.1527            
     1294.5643                 1310.5307                 1334.8408            
     1397.7532                 1434.8279                 1485.8232            
     1501.1418                 1774.3630                 3082.8514            
     3097.4074                 3132.3512                 3162.7554            
     3193.8803                 3228.2664                 3916.4641            
Zero-point correction (Hartree): 0.111623

HOCHCHCH2CH2OO.Zgttc
~~~~~~~~~~~~~~~~~~~~
E(UM062X/Aug-CC-pVTZ) (Hartree): -382.13967776 
Electronic state : 2-A
Cartesian coordinates (Angs):
     C       2.398795      0.120656      -0.319230
     C       1.388901      0.958388      -0.113563
     C       0.123169      0.616565       0.617809
     C      -0.960737      0.190896      -0.354749
     O      -2.151912     -0.090414       0.411191
     O      -3.129570     -0.472234      -0.351222
     O       2.490714     -1.166102       0.096813
     H       3.285422      0.415956      -0.862452
     H       1.484300      1.951272      -0.529376
     H       0.277657     -0.180984       1.349411
     H      -0.228776      1.479200       1.183930
     H      -1.203033      0.978332      -1.067333
     H      -0.693941     -0.714815      -0.898969
     H       1.703757     -1.418004       0.588932
Rotational constants (GHz):    7.1967100    1.0749200    1.0053600
Vibrational harmonic frequencies (cm-1):
       27.6140                   75.3062                  103.2976            
      164.6930                  279.9752                  327.4172            
      409.5551                  486.7181                  584.7638            
      659.6895                  772.5865                  798.5818            
      963.9454                  998.3189                 1023.3267            
     1066.5952                 1102.6237                 1135.4684            
     1203.3977                 1251.5210                 1290.0301            
     1301.4801                 1310.1920                 1349.7321            
     1403.9103                 1437.3067                 1501.7698            
     1515.9947                 1754.9348                 3056.6056            
     3086.3611                 3107.6039                 3144.8072            
     3213.9386                 3234.4311                 3863.8149            
Zero-point correction (Hartree): 0.111649

HOCHCHCH2CH2OO.Zgttt
~~~~~~~~~~~~~~~~~~~~
E(UM062X/Aug-CC-pVTZ) (Hartree): -382.13973051 
Electronic state : 2-A
Cartesian coordinates (Angs):
     C       2.351439      0.076127      -0.312571
     C       1.403691      0.990183      -0.166351
     C       0.127070      0.732235       0.579489
     C      -0.917596      0.150776      -0.353388
     O      -2.130330     -0.040952       0.408884
     O      -3.082366     -0.527365      -0.325056
     O       2.223606     -1.171407       0.223381
     H       3.264418      0.272205      -0.861180
     H       1.560642      1.950948      -0.635060
     H       0.303140      0.027431       1.391986
     H      -0.254728      1.656223       1.013054
     H      -1.154796      0.818428      -1.180964
     H      -0.613335     -0.819983      -0.742173
     H       3.019754     -1.683391       0.073604
Rotational constants (GHz):    6.8219700    1.1327600    1.0449100
Vibrational harmonic frequencies (cm-1):
       17.7531                   75.6068                  100.6331            
      163.6008                  251.6023                  256.2517            
      357.1504                  470.8270                  578.0969            
      671.1409                  764.7380                  804.8320            
      967.3141                  972.8733                 1022.0913            
     1068.3820                 1103.5542                 1130.0493            
     1208.6234                 1269.6215                 1292.2993            
     1293.7736                 1312.5331                 1316.4638            
     1403.7061                 1435.9979                 1494.8269            
     1505.7502                 1776.5340                 3080.9903            
     3090.6090                 3125.2729                 3151.1963            
     3192.8048                 3228.0659                 3916.2471            
Zero-point correction (Hartree): 0.111338

HOCHCHCH2CH2OO.Zlmmc
~~~~~~~~~~~~~~~~~~~~
E(UM062X/Aug-CC-pVTZ) (Hartree): -382.13994056 
Electronic state : 2-A
Cartesian coordinates (Angs):
     C       2.143768     -0.664679       0.139343
     C       0.823500     -0.626813       0.007766
     C       0.009027      0.560010      -0.410802
     C      -1.165145      0.807557       0.521676
     O      -2.073223     -0.316307       0.501905
     O      -2.704934     -0.391193      -0.629406
     O       3.028093      0.339703      -0.091022
     H       2.655945     -1.560534       0.461000
     H       0.286885     -1.541015       0.221674
     H       0.598678      1.479894      -0.427379
     H      -0.393321      0.426727      -1.417786
     H      -0.850580      0.878497       1.561091
     H      -1.737194      1.687549       0.232840
     H       2.573202      1.114817      -0.431159
Rotational constants (GHz):    8.3236200    1.1198900    1.0759200
Vibrational harmonic frequencies (cm-1):
       17.6350                   67.8239                  141.9868            
      214.7837                  252.1685                  318.5315            
      428.7667                  524.9213                  588.2432            
      647.9435                  778.0323                  823.9482            
      899.4037                  997.0807                 1004.6641            
     1043.3525                 1106.6705                 1128.8582            
     1219.1224                 1238.5768                 1279.6884            
     1305.2664                 1337.6068                 1369.0230            
     1397.5003                 1441.7449                 1472.6402            
     1491.9527                 1760.7025                 3057.5479            
     3090.4578                 3101.2578                 3159.9774            
     3209.5933                 3231.4405                 3876.0568            
Zero-point correction (Hartree): 0.111687

HOCHCHCH2CH2OO.Zlmmt
~~~~~~~~~~~~~~~~~~~~
E(UM062X/Aug-CC-pVTZ) (Hartree): -382.14069596 
Electronic state : 2-A
Cartesian coordinates (Angs):
     C      -2.088309     -0.661230      -0.159614
     C      -0.799558     -0.727793       0.137412
     C       0.004714      0.427704       0.647944
     C       1.058514      0.886017      -0.344729
     O       1.993842     -0.180062      -0.630865
     O       2.748805     -0.433773       0.393502
     O      -2.807425      0.491902      -0.019341
     H      -2.635411     -1.519816      -0.529306
     H      -0.303212     -1.676494      -0.011978
     H      -0.647327      1.274451       0.860453
     H       0.514923      0.159490       1.574692
     H       0.624742      1.125067      -1.313747
     H       1.637611      1.726756       0.033916
     H      -3.725278      0.337827      -0.246486
Rotational constants (GHz):    8.0364600    1.1756500    1.1218800
Vibrational harmonic frequencies (cm-1):
       23.9377                   62.4069                  135.4223            
      205.8432                  253.4339                  279.2227            
      389.6089                  524.3234                  602.4719            
      656.0122                  778.7954                  827.2330            
      890.9544                  976.7741                 1004.8483            
     1048.0315                 1099.1372                 1132.7352            
     1211.3681                 1247.2811                 1294.7766            
     1300.3257                 1305.2226                 1357.3751            
     1392.5991                 1444.6908                 1480.8993            
     1489.5894                 1781.4930                 3077.5404            
     3094.8937                 3130.4073                 3159.1728            
     3191.1439                 3224.0324                 3920.0462            
Zero-point correction (Hartree): 0.111617

HOCHCHCH2CH2OO.Zlmpc
~~~~~~~~~~~~~~~~~~~~
E(UM062X/Aug-CC-pVTZ) (Hartree): -382.13868808 
Electronic state : 2-A
Cartesian coordinates (Angs):
     C      -1.989705     -0.744530       0.029943
     C      -0.720256     -0.485431       0.318009
     C      -0.087986      0.872455       0.366130
     C       1.236003      0.929434      -0.382633
     O       2.209234      0.096137       0.280618
     O       2.301386     -1.081886      -0.259005
     O      -2.973361      0.146858      -0.259003
     H      -2.368788     -1.756248       0.000843
     H      -0.087874     -1.335139       0.534889
     H      -0.728776      1.638039      -0.079650
     H       0.094512      1.182833       1.398414
     H       1.147655      0.572355      -1.406187
     H       1.661348      1.931503      -0.357447
     H      -2.644486      1.046223      -0.180442
Rotational constants (GHz):    6.7689600    1.2445200    1.1083900
Vibrational harmonic frequencies (cm-1):
       18.0344                   91.5867                  105.7143            
      226.4445                  232.0717                  322.9611            
      433.7305                  515.3716                  568.8543            
      651.4993                  779.4896                  844.9060            
      878.1583                  999.1262                 1017.5783            
     1051.9170                 1093.4299                 1129.7210            
     1230.1992                 1236.6756                 1271.0215            
     1318.5707                 1345.2177                 1372.6220            
     1390.8427                 1445.6145                 1469.7737            
     1485.7653                 1760.8773                 3047.9076            
     3082.0069                 3098.8408                 3163.8554            
     3211.9308                 3234.1030                 3877.2726            
Zero-point correction (Hartree): 0.111639

HOCHCHCH2CH2OO.Zlmpt
~~~~~~~~~~~~~~~~~~~~
E(UM062X/Aug-CC-pVTZ) (Hartree): -382.13978773 
Electronic state : 2-A
Cartesian coordinates (Angs):
     C      -1.922704     -0.708652       0.104527
     C      -0.703461     -0.461169       0.557734
     C      -0.057498      0.888661       0.521306
     C       1.167248      0.936171      -0.379521
     O       2.204704      0.079601       0.144661
     O       2.144685     -1.121019      -0.347727
     O      -2.709907      0.267767      -0.438055
     H      -2.355496     -1.700688       0.142598
     H      -0.144789     -1.293540       0.961654
     H      -0.767207      1.631260       0.156524
     H       0.247172      1.192543       1.525260
     H       0.948198      0.597554      -1.389685
     H       1.610516      1.930687      -0.392956
     H      -3.555761     -0.098666      -0.698706
Rotational constants (GHz):    6.1146800    1.3366200    1.2016300
Vibrational harmonic frequencies (cm-1):
       27.3716                   88.2057                  114.5263            
      221.3444                  238.6604                  267.6976            
      403.9375                  513.5193                  587.8196            
      654.3555                  781.7969                  849.4386            
      877.1053                  977.9788                 1013.9296            
     1054.9938                 1090.2377                 1130.0488            
     1216.4038                 1236.8401                 1291.6605            
     1297.7336                 1321.4059                 1361.5667            
     1385.6273                 1446.8172                 1479.1669            
     1485.9362                 1781.7754                 3066.5438            
     3096.1160                 3123.3747                 3162.6365            
     3192.2612                 3226.0934                 3921.1846            
Zero-point correction (Hartree): 0.111599

HOCHCHCH2CH2OO.Zlmtc
~~~~~~~~~~~~~~~~~~~~
E(UM062X/Aug-CC-pVTZ) (Hartree): -382.13905289 
Electronic state : 2-A
Cartesian coordinates (Angs):
     C      -2.192234     -0.718371      -0.080291
     C      -0.903735     -0.591983       0.212102
     C      -0.170168      0.700361       0.418640
     C       1.165032      0.721580      -0.299271
     O       1.997363     -0.285070       0.318060
     O       3.143934     -0.386438      -0.278970
     O      -3.107001      0.273427      -0.230218
     H      -2.647185     -1.686944      -0.232436
     H      -0.333417     -1.505117       0.311545
     H      -0.739251      1.555554       0.046180
     H       0.009899      0.884330       1.481313
     H       1.071934      0.464778      -1.353488
     H       1.680731      1.674843      -0.191820
     H      -2.710451      1.127670      -0.039355
Rotational constants (GHz):    9.7604000    1.0288300    0.9728300
Vibrational harmonic frequencies (cm-1):
       19.6535                   66.5428                  120.1996            
      217.3154                  241.8543                  313.8582            
      388.7097                  501.0476                  578.1024            
      661.9453                  779.6506                  823.0225            
      908.1268                  998.9615                 1044.1810            
     1051.8555                 1090.0733                 1136.9804            
     1229.3177                 1236.2048                 1287.8689            
     1296.4890                 1335.1353                 1372.6237            
     1400.6148                 1444.0866                 1469.3469            
     1501.9053                 1759.4537                 3050.8456            
     3083.3175                 3094.3059                 3148.6704            
     3211.1193                 3233.2802                 3875.4610            
Zero-point correction (Hartree): 0.111567

HOCHCHCH2CH2OO.Zlmtt
~~~~~~~~~~~~~~~~~~~~
E(UM062X/Aug-CC-pVTZ) (Hartree): -382.14001114 
Electronic state : 2-A
Cartesian coordinates (Angs):
     C      -2.129890     -0.693101      -0.078516
     C      -0.912971     -0.635025       0.440602
     C      -0.162846      0.640650       0.675647
     C       1.084324      0.746825      -0.178450
     O       1.976008     -0.318638       0.223395
     O       3.051639     -0.340873      -0.499865
     O      -2.819622      0.428371      -0.441076
     H      -2.637773     -1.636103      -0.239607
     H      -0.434511     -1.570323       0.694454
     H      -0.799649      1.494655       0.448190
     H       0.129922      0.721365       1.724899
     H       0.872470      0.609029      -1.237642
     H       1.616475      1.684755      -0.024412
     H      -3.682831      0.189645      -0.781210
Rotational constants (GHz):    8.1761600    1.0884600    1.0485000
Vibrational harmonic frequencies (cm-1):
       23.2548                   68.7763                  118.9651            
      204.1627                  245.2082                  274.0911            
      350.5013                  480.3196                  602.0876            
      655.5972                  780.3875                  824.4920            
      907.0490                  976.6682                 1041.0311            
     1052.1215                 1085.7309                 1138.5377            
     1217.7992                 1245.1212                 1293.7441            
     1300.0195                 1304.5116                 1356.4493            
     1395.4060                 1446.1590                 1480.4572            
     1500.4784                 1781.5388                 3067.6293            
     3086.9684                 3129.9267                 3147.0592            
     3191.7444                 3226.1869                 3920.6148            
Zero-point correction (Hartree): 0.111450

HOCHCHCH2CH2OO.Zlpmt
~~~~~~~~~~~~~~~~~~~~
E(UM062X/Aug-CC-pVTZ) (Hartree): -382.13945018 
Electronic state : 2-A
Cartesian coordinates (Angs):
     C      -1.792042     -0.245705       0.497000
     C      -0.763719      0.514753       0.840462
     C       0.080855      1.269692      -0.135131
     C       1.532826      0.812047      -0.131362
     O       1.629254     -0.554384      -0.573924
     O       1.511557     -1.390915       0.414204
     O      -2.197243     -0.376930      -0.798829
     H      -2.365981     -0.794326       1.233637
     H      -0.507953      0.557576       1.890440
     H      -0.322875      1.165542      -1.141313
     H       0.084996      2.336127       0.106554
     H       2.127656      1.380476      -0.844490
     H       1.979199      0.862095       0.860435
     H      -2.891109     -1.034385      -0.862684
Rotational constants (GHz):    4.2484800    1.7298900    1.5147800
Vibrational harmonic frequencies (cm-1):
       17.9802                   96.2996                  108.0144            
      219.1300                  246.6748                  290.6683            
      387.2275                  523.5856                  545.1065            
      672.0064                  766.3136                  846.1595            
      923.9577                  971.3979                  991.2150            
     1047.3391                 1068.3295                 1149.5674            
     1225.9786                 1235.6111                 1284.1883            
     1297.3051                 1318.1810                 1360.7644            
     1393.2404                 1446.2410                 1477.8737            
     1486.1508                 1782.0974                 3058.1557            
     3092.6592                 3127.6936                 3155.3540            
     3189.6091                 3217.7380                 3919.5797            
Zero-point correction (Hartree): 0.111492

HOCHCHCH2CH2OO.Zlptt
~~~~~~~~~~~~~~~~~~~~
E(UM062X/Aug-CC-pVTZ) (Hartree): -382.13906481 
Electronic state : 2-A
Cartesian coordinates (Angs):
     C      -2.005846     -0.189901       0.557402
     C      -1.055449      0.728700       0.636447
     C      -0.149303      1.104773      -0.494933
     C       1.307147      0.824153      -0.185709
     O       1.465252     -0.607883      -0.080592
     O       2.673323     -0.927575       0.263857
     O      -2.267356     -0.865206      -0.597161
     H      -2.627361     -0.440774       1.408355
     H      -0.920009      1.219966       1.591008
     H      -0.434299      0.569448      -1.399886
     H      -0.232266      2.172840      -0.710148
     H       1.972741      1.163634      -0.978403
     H       1.622660      1.253347       0.765125
     H      -2.930518     -1.539498      -0.444117
Rotational constants (GHz):    5.0261900    1.3870900    1.2335400
Vibrational harmonic frequencies (cm-1):
       21.3258                   66.7347                  117.6948            
      209.2188                  235.3191                  293.1693            
      337.7011                  470.2339                  570.4101            
      675.2776                  764.1390                  852.0397            
      890.5305                  971.6337                 1039.7919            
     1062.8667                 1072.7564                 1140.2453            
     1216.0551                 1265.2629                 1288.7033            
     1296.4313                 1299.1031                 1356.4039            
     1399.5920                 1448.0565                 1478.8844            
     1502.9722                 1786.2420                 3066.2634            
     3082.7260                 3125.5137                 3141.4267            
     3187.1186                 3213.1129                 3920.4763            
Zero-point correction (Hartree): 0.111324

HOCHCHCH2CH2OO.Zpmmc
~~~~~~~~~~~~~~~~~~~~
E(CCSD(T)/Aug-CC-pVTZ) (Hartree): -381.60037010 
E(CCSD/Aug-CC-pVTZ) (Hartree): -381.53772838 
     T1 diagnostic:  0.022191 
E(MP2/Aug-CC-pVTZ) (Hartree): -381.49448818 
E(MP3/Aug-CC-pVTZ) (Hartree): -381.52479655 
E(PMP2/Aug-CC-pVTZ) (Hartree): -381.49774632 
E(PMP3/Aug-CC-pVTZ) (Hartree): -381.52669599 
E(PUHF/Aug-CC-pVTZ) (Hartree): -380.13149271 
E(UHF/Aug-CC-pVTZ) (Hartree): -380.12616632 
E(UM062X/Aug-CC-pVTZ) (Hartree): -382.14414641 
Electronic state : 2-A
Cartesian coordinates (Angs):
     C       1.838020      0.079555       0.342809
     C       1.016432      1.117681       0.218070
     C      -0.200990      1.144807      -0.658951
     C      -1.489617      0.807122       0.068881
     O      -1.451380     -0.522535       0.649006
     O      -1.199537     -1.432397      -0.236220
     O       1.729213     -1.129048      -0.251044
     H       2.725321      0.135368       0.959152
     H       1.258623      2.004009       0.787568
     H      -0.332366      2.141817      -1.082837
     H      -0.092628      0.466424      -1.506073
     H      -1.657397      1.451712       0.929058
     H      -2.353180      0.834791      -0.595467
     H       0.842185     -1.257284      -0.610196
Rotational constants (GHz):    3.8427200    2.2415600    1.6192300
Vibrational harmonic frequencies (cm-1):
       53.1930                  131.5021                  148.7968            
      214.3796                  291.8812                  357.7868            
      466.1477                  541.8760                  599.5496            
      667.3210                  761.4688                  849.8795            
      886.5390                  981.9506                  996.2389            
     1037.1786                 1088.8224                 1148.0690            
     1222.6972                 1260.3105                 1275.4686            
     1306.3988                 1351.2209                 1373.7689            
     1404.3696                 1442.6719                 1490.4872            
     1495.2118                 1747.8273                 3075.1083            
     3090.8924                 3114.1355                 3157.0129            
     3205.6803                 3226.0874                 3797.6382            
Zero-point correction (Hartree): 0.112222

HOCHCHCH2CH2OO.Zptpc
~~~~~~~~~~~~~~~~~~~~
E(UM062X/Aug-CC-pVTZ) (Hartree): -382.14299943 
Electronic state : 2-A
Cartesian coordinates (Angs):
     C       1.990719     -0.256495       0.149012
     C       1.485695      0.947781      -0.106531
     C       0.056334      1.134753      -0.529354
     C      -0.937822      0.806510       0.595548
     O      -2.050788      0.022964       0.099607
     O      -1.651134     -1.141169      -0.305940
     O       1.331854     -1.432158       0.068728
     H       3.017806     -0.397564       0.456449
     H       2.133420      1.803863       0.003447
     H      -0.110610      2.147300      -0.887896
     H      -0.173160      0.466885      -1.364114
     H      -0.471153      0.216023       1.382390
     H      -1.404024      1.688816       1.026043
     H       0.398713     -1.317709      -0.167528
Rotational constants (GHz):    4.3235600    1.9772300    1.4811700
Vibrational harmonic frequencies (cm-1):
       86.7356                  102.9580                  196.4536            
      219.3773                  324.4331                  366.9969            
      522.0243                  568.6202                  624.7459            
      707.6098                  753.2826                  813.2521            
      954.6509                  992.7960                 1003.1022            
     1032.6939                 1079.1186                 1135.4807            
     1230.2006                 1263.6910                 1287.2719            
     1308.1613                 1339.8173                 1375.1774            
     1399.4617                 1431.3431                 1493.5697            
     1509.4091                 1733.6295                 3059.1022            
     3101.0760                 3136.5884                 3168.4579            
     3216.8284                 3242.0571                 3721.9528            
Zero-point correction (Hartree): 0.112774


TS.HOCHCHCH2CH2OO.cycHOCHCHCH2CH2OO.Zp
~~~~~~~~~~~~~~~~~~~~~~~~~~~~~~~~~~~~~~
E(CCSD(T)/Aug-CC-pVTZ) (Hartree): -381.57530128 
E(CCSD/Aug-CC-pVTZ) (Hartree): -381.50813416 
     T1 diagnostic:  0.028163 
E(MP2/Aug-CC-pVTZ) (Hartree): -381.46065809 
E(MP3/Aug-CC-pVTZ) (Hartree): -381.48930848 
E(PMP2/Aug-CC-pVTZ) (Hartree): -381.47781124 
E(PMP3/Aug-CC-pVTZ) (Hartree): -381.50213210 
E(PUHF/Aug-CC-pVTZ) (Hartree): -380.10312287 
E(UHF/Aug-CC-pVTZ) (Hartree): -380.08321231 
E(UM062X/Aug-CC-pVTZ) (Hartree): -382.11528532 
Electronic state : 2-A
Cartesian coordinates (Angs):
     C      -1.313651      0.291233       0.341855
     C      -0.290224      1.192205       0.597926
     C       0.894511      1.228012      -0.296765
     C       1.630403     -0.125664      -0.144674
     O       0.687093     -1.170389      -0.292135
     O      -0.130432     -1.179717       0.824619
     O      -1.677701     -0.116515      -0.885788
     H      -2.107594      0.163169       1.065677
     H      -0.202646      1.551906       1.612946
     H       0.601424      1.347293      -1.342140
     H       1.571932      2.041338      -0.041842
     H       2.372267     -0.273285      -0.929519
     H       2.096557     -0.203814       0.837668
     H      -0.889856     -0.408346      -1.366413
Rotational constants (GHz):    3.8895600    2.8846500    2.2593700
Vibrational harmonic frequencies (cm-1):
     i623.4638                  177.6328                  248.3701            
      280.9721                  391.9599                  432.6138            
      452.0873                  500.3075                  587.6845            
      663.9523                  737.8072                  875.1450            
      919.1406                  932.5186                  979.4588            
     1017.9830                 1061.3809                 1077.5628            
     1148.8220                 1210.9937                 1256.2309            
     1268.3454                 1318.6422                 1340.3793            
     1369.6287                 1434.1885                 1484.4078            
     1497.9549                 1538.4045                 3065.6462            
     3076.6998                 3128.7866                 3140.1905            
     3209.6855                 3225.6704                 3759.1579            
Zero-point correction (Hartree): 0.111198

TS.HOCHCHCH2CH2OO.cycHOCHCHCH2CH2OO.Zt
~~~~~~~~~~~~~~~~~~~~~~~~~~~~~~~~~~~~~~
E(UM062X/Aug-CC-pVTZ) (Hartree): -382.11419635 
Electronic state : 2-A
Cartesian coordinates (Angs):
     C      -1.287511      0.259883       0.386557
     C      -0.294591      1.181154       0.633815
     C       0.851787      1.247950      -0.305377
     C       1.636262     -0.084230      -0.149982
     O       0.753486     -1.169180      -0.328771
     O      -0.090769     -1.241275       0.751995
     O      -1.630822     -0.007392      -0.891770
     H      -2.019276      0.015380       1.147963
     H      -0.171789      1.509338       1.655646
     H       0.518979      1.326247      -1.338814
     H       1.519237      2.078630      -0.080707
     H       2.397095     -0.186422      -0.923444
     H       2.090673     -0.145555       0.840312
     H      -2.025769     -0.883393      -0.942661
Rotational constants (GHz):    3.8492700    2.8899600    2.2304200
Vibrational harmonic frequencies (cm-1):
     i636.9546                  172.7885                  237.3710            
      258.3095                  345.3806                  425.8914            
      446.6402                  470.7412                  581.9767            
      665.6133                  750.0642                  868.5386            
      930.9654                  944.1562                  984.0003            
     1021.3281                 1065.7209                 1080.7316            
     1155.5223                 1207.5550                 1260.3485            
     1273.2681                 1283.4913                 1320.2074            
     1368.5899                 1434.2763                 1481.3443            
     1490.0791                 1559.9629                 3068.6534            
     3091.3822                 3132.4485                 3147.5517            
     3178.7540                 3223.6184                 3862.1701            
Zero-point correction (Hartree): 0.111151


#################################################################################
E-HOCH=C(CH3)CH2CH2OO ring closure and H-shift
#################################################################################

HOCHCCH3CH2CH2OO.Ecppc
~~~~~~~~~~~~~~~~~~~~~~
E(UM062X/Aug-CC-pVTZ) (Hartree): -421.45033361 
Electronic state : 2-A
Cartesian coordinates (Angs):
     C      -1.103065     -0.871471       0.191141
     C      -0.923169      0.437989       0.049117
     C       0.395924      1.105234       0.334463
     C       1.491277      0.242106       0.917800
     O       1.954620     -0.751298      -0.027162
     O       2.592063     -0.202878      -1.014324
     O      -2.250252     -1.571520      -0.021246
     H      -0.307885     -1.538884       0.491128
     C      -1.996493      1.381879      -0.412544
     H       0.784451      1.565845      -0.579038
     H       0.231319      1.930178       1.035728
     H       2.356948      0.841506       1.192988
     H       1.153244     -0.338338       1.774789
     H      -2.959546     -0.976412      -0.277049
     H      -2.282302      2.070261       0.386228
     H      -2.903590      0.887905      -0.759677
     H      -1.630930      1.989086      -1.243099
Rotational constants (GHz):    3.2229900    1.1959300    1.0071900
Vibrational harmonic frequencies (cm-1):
       51.8982                   69.8197                   73.8428            
      147.1759                  217.6721                  261.0593            
      300.7799                  325.5790                  340.9710            
      477.0424                  492.8291                  545.1056            
      613.4975                  792.7749                  844.9085            
      922.6439                  972.1016                  990.6421            
     1022.9268                 1055.5205                 1118.1250            
     1179.2911                 1217.1855                 1231.9348            
     1277.5549                 1296.8105                 1317.5123            
     1396.5873                 1402.2311                 1423.3292            
     1438.1956                 1472.3417                 1478.9286            
     1496.0521                 1505.6938                 1781.0266            
     3038.5655                 3048.2013                 3068.5338            
     3098.9307                 3100.1948                 3124.0822            
     3154.6785                 3232.9326                 3881.6709            
Zero-point correction (Hartree): 0.139650

HOCHCCH3CH2CH2OO.Ecppt
~~~~~~~~~~~~~~~~~~~~~~
E(UM062X/Aug-CC-pVTZ) (Hartree): -421.45049488 
Electronic state : 2-A
Cartesian coordinates (Angs):
     C      -1.104756     -0.841832       0.194140
     C      -0.917761      0.462519       0.041328
     C       0.404086      1.129509       0.303331
     C       1.497118      0.278838       0.908852
     O       1.943860     -0.756505       0.000620
     O       2.585868     -0.256450      -1.009129
     O      -2.321172     -1.428384      -0.034035
     H      -0.313292     -1.514921       0.498488
     C      -2.014262      1.373580      -0.423936
     H       0.789235      1.563549      -0.624469
     H       0.244566      1.974288       0.981369
     H       2.371537      0.878173       1.155111
     H       1.158947     -0.265689       1.789342
     H      -2.238138     -2.380469       0.030156
     H      -2.237775      2.126436       0.335668
     H      -2.924844      0.823720      -0.643640
     H      -1.705234      1.909941      -1.323966
Rotational constants (GHz):    3.2608800    1.1933500    1.0065700
Vibrational harmonic frequencies (cm-1):
       64.2134                   69.7592                  128.4212            
      147.9245                  202.7073                  220.2890            
      280.1259                  304.5266                  309.7661            
      459.1385                  476.7862                  545.6244            
      617.3729                  804.5104                  838.1869            
      894.5427                  972.8820                  987.6513            
     1020.9739                 1061.4689                 1119.3137            
     1187.0261                 1200.6626                 1231.1333            
     1279.8442                 1304.1932                 1315.6101            
     1387.4788                 1398.6469                 1409.4114            
     1438.5514                 1469.9868                 1491.9479            
     1493.7130                 1495.7324                 1800.1772            
     3041.0298                 3049.1693                 3070.3455            
     3095.7183                 3097.7090                 3153.4042            
     3168.7181                 3202.3506                 3921.7865            
Zero-point correction (Hartree): 0.139493

HOCHCCH3CH2CH2OO.Ecptc
~~~~~~~~~~~~~~~~~~~~~~
E(UM062X/Aug-CC-pVTZ) (Hartree): -421.44964409 
Electronic state : 2-A
Cartesian coordinates (Angs):
     C       0.958460      0.920769       0.176224
     C       1.056457     -0.394701       0.011636
     C      -0.134754     -1.309029       0.129860
     C      -1.439234     -0.683554       0.559397
     O      -1.928124      0.141653      -0.523660
     O      -3.012965      0.767980      -0.188622
     O       1.964580      1.833701       0.114548
     H       0.017272      1.414141       0.372494
     C       2.341567     -1.103477      -0.306493
     H      -0.295534     -1.825626      -0.822258
     H       0.096126     -2.096372       0.854757
     H      -2.201540     -1.437712       0.748404
     H      -1.336795     -0.046262       1.437080
     H       2.803597      1.393954      -0.044874
     H       2.649076     -1.746589       0.521495
     H       3.173599     -0.436166      -0.529254
     H       2.211299     -1.746085      -1.179711
Rotational constants (GHz):    3.3065000    1.1620200    0.9115700
Vibrational harmonic frequencies (cm-1):
       39.4128                   52.5256                   72.1304            
      128.7292                  228.7058                  257.5636            
      290.8939                  323.7623                  338.1896            
      394.0621                  493.4623                  563.6174            
      607.2767                  795.5039                  831.6187            
      933.5204                  977.2514                 1009.9132            
     1030.1231                 1074.5935                 1109.3652            
     1180.0895                 1216.7749                 1236.2106            
     1283.9118                 1295.7526                 1302.1399            
     1391.7808                 1407.0620                 1424.9217            
     1441.9287                 1471.4976                 1479.7302            
     1505.3723                 1508.0329                 1781.5179            
     3035.6387                 3047.6372                 3061.6866            
     3090.1179                 3098.7149                 3125.4747            
     3142.3662                 3234.4097                 3881.7042            
Zero-point correction (Hartree): 0.139416

HOCHCCH3CH2CH2OO.Ecptt
~~~~~~~~~~~~~~~~~~~~~~
E(UM062X/Aug-CC-pVTZ) (Hartree): -421.45008565 
Electronic state : 2-A
Cartesian coordinates (Angs):
     C       0.949245      0.896312       0.173511
     C       1.049244     -0.416643       0.012924
     C      -0.135912     -1.337351       0.118120
     C      -1.445615     -0.719812       0.542801
     O      -1.925296      0.123323      -0.531726
     O      -2.955198      0.820810      -0.165589
     O       2.041054      1.717938       0.093176
     H       0.007111      1.392579       0.368978
     C       2.355536     -1.083852      -0.297378
     H      -0.284575     -1.849886      -0.838045
     H       0.095114     -2.126970       0.840052
     H      -2.210711     -1.475964       0.713060
     H      -1.351997     -0.094804       1.430111
     H       1.762803      2.632521       0.154340
     H       2.621025     -1.794855       0.488654
     H       3.160225     -0.360887      -0.395257
     H       2.281535     -1.650231      -1.228646
Rotational constants (GHz):    3.3040500    1.1760800    0.9184100
Vibrational harmonic frequencies (cm-1):
       39.1216                   64.6219                  128.1937            
      134.5810                  219.8758                  237.7368            
      275.3857                  299.8364                  306.6485            
      395.6929                  461.5607                  564.4930            
      611.0092                  806.0451                  825.4997            
      902.5628                  978.5088                 1008.2744            
     1030.0588                 1075.5645                 1111.3507            
     1188.2078                 1201.5821                 1235.4196            
     1286.3389                 1298.9974                 1305.7658            
     1387.2775                 1395.9645                 1413.2556            
     1443.2880                 1469.1613                 1493.2110            
     1494.0080                 1506.8397                 1800.8022            
     3038.4796                 3048.6987                 3064.8658            
     3089.6645                 3094.9998                 3142.0858            
     3168.8376                 3203.8529                 3920.8200            
Zero-point correction (Hartree): 0.139353

HOCHCCH3CH2CH2OO.Ectpc
~~~~~~~~~~~~~~~~~~~~~~
E(UM062X/Aug-CC-pVTZ) (Hartree): -421.45041178 
Electronic state : 2-A
Cartesian coordinates (Angs):
     C       1.572068     -0.848306      -0.035840
     C       1.048365      0.370431       0.058022
     C      -0.430853      0.592940       0.216823
     C      -1.275230     -0.662205       0.231476
     O      -2.664912     -0.314663       0.411511
     O      -3.163533      0.215424      -0.662995
     O       2.883973     -1.174345      -0.191749
     H       0.970192     -1.745366       0.005025
     C       1.858942      1.633757       0.008171
     H      -0.617029      1.146169       1.142711
     H      -0.792868      1.228042      -0.596810
     H      -1.198296     -1.223420      -0.698772
     H      -1.047709     -1.305710       1.079830
     H       3.418857     -0.378750      -0.252772
     H       2.936081      1.471320      -0.013281
     H       1.647700      2.253607       0.881680
     H       1.599093      2.223085      -0.873668
Rotational constants (GHz):    4.4348700    0.9033900    0.7892900
Vibrational harmonic frequencies (cm-1):
       53.6282                   69.9208                   88.4423            
      135.7319                  170.3219                  257.5520            
      290.1776                  336.9574                  353.7257            
      404.0617                  491.8700                  547.3106            
      647.4542                  792.2281                  844.8403            
      918.2831                  977.5671                 1004.5079            
     1035.6693                 1091.3277                 1117.8562            
     1178.3510                 1218.5345                 1240.8101            
     1279.3550                 1293.0455                 1329.7371            
     1349.0943                 1410.2839                 1426.3496            
     1442.5403                 1479.1171                 1490.3443            
     1503.1670                 1506.4381                 1778.2516            
     3040.4836                 3052.2854                 3075.5687            
     3093.2477                 3105.0726                 3127.5160            
     3154.5866                 3227.0072                 3881.4336            
Zero-point correction (Hartree): 0.139679

HOCHCCH3CH2CH2OO.Ectpt
~~~~~~~~~~~~~~~~~~~~~~
E(UM062X/Aug-CC-pVTZ) (Hartree): -421.45000645 
Electronic state : 2-A
Cartesian coordinates (Angs):
     C       1.577852     -0.819250      -0.040591
     C       1.039649      0.390526       0.048849
     C      -0.439288      0.606583       0.202344
     C      -1.275694     -0.652926       0.243520
     O      -2.668115     -0.314816       0.420538
     O      -3.177044      0.179949      -0.665932
     O       2.928480     -1.001619      -0.177833
     H       0.988561     -1.727576      -0.009288
     C       1.873460      1.636055       0.003073
     H      -0.626141      1.177823       1.116948
     H      -0.803352      1.224427      -0.623312
     H      -1.197913     -1.231149      -0.676395
     H      -1.040261     -1.278141       1.103607
     H       3.126312     -1.936141      -0.247113
     H       2.928756      1.407436      -0.114273
     H       1.742175      2.216290       0.919033
     H       1.559429      2.272992      -0.826568
Rotational constants (GHz):    4.5430900    0.8957900    0.7869900
Vibrational harmonic frequencies (cm-1):
       66.1054                   81.8442                  118.2333            
      133.7300                  168.4497                  211.6414            
      270.5425                  300.3762                  340.0182            
      401.4638                  463.2389                  548.0668            
      655.0680                  787.2887                  856.5622            
      882.6100                  976.6554                 1004.0975            
     1038.8936                 1090.5760                 1119.9076            
     1183.3872                 1200.1907                 1240.4372            
     1284.8237                 1297.3005                 1328.9850            
     1344.8630                 1391.9456                 1417.1383            
     1441.1149                 1486.2883                 1493.8206            
     1495.3588                 1502.2354                 1796.0394            
     3042.9124                 3052.9699                 3078.1945            
     3090.6331                 3100.8132                 3151.6730            
     3170.4785                 3193.7375                 3923.0461            
Zero-point correction (Hartree): 0.139478

HOCHCCH3CH2CH2OO.Ecttc
~~~~~~~~~~~~~~~~~~~~~~
E(UM062X/Aug-CC-pVTZ) (Hartree): -421.44977810 
Electronic state : 2-A
Cartesian coordinates (Angs):
     C       1.488099     -0.916064      -0.005446
     C       1.157250      0.372000      -0.004153
     C      -0.277382      0.825472      -0.006417
     C      -1.301472     -0.284018       0.000130
     O      -2.599710      0.348790       0.000616
     O      -3.555657     -0.527145       0.004487
     O       2.740169     -1.447403       0.002084
     H       0.750225     -1.706120      -0.013362
     C       2.156681      1.492604       0.004339
     H      -0.453841      1.465276       0.863764
     H      -0.454740      1.456607      -0.882589
     H      -1.248142     -0.912948      -0.888009
     H      -1.243594     -0.906166       0.892763
     H       3.398381     -0.748000       0.022418
     H       3.194147      1.164942      -0.051675
     H       2.053967      2.092384       0.911142
     H       1.986132      2.160124      -0.842661
Rotational constants (GHz):    4.5196000    0.8584100    0.7311900
Vibrational harmonic frequencies (cm-1):
       39.9873                   66.4798                  104.0525            
      118.0175                  126.4742                  258.2234            
      277.4712                  336.0857                  345.7019            
      356.7540                  491.5233                  552.7374            
      628.5252                  781.4722                  838.9029            
      916.1860                 1004.7024                 1027.4762            
     1032.3684                 1102.6472                 1113.7519            
     1180.2951                 1219.2221                 1231.7335            
     1285.5998                 1297.2377                 1310.4639            
     1346.4920                 1411.7788                 1429.2141            
     1447.0180                 1479.5478                 1495.7512            
     1506.2214                 1512.9631                 1778.6707            
     3041.0038                 3052.2032                 3069.5630            
     3084.7357                 3103.9782                 3128.5020            
     3142.6828                 3227.4756                 3881.6338            
Zero-point correction (Hartree): 0.139386

HOCHCCH3CH2CH2OO.Ecttt
~~~~~~~~~~~~~~~~~~~~~~
E(UM062X/Aug-CC-pVTZ) (Hartree): -421.44960190 
Electronic state : 2-A
Cartesian coordinates (Angs):
     C       1.497402     -0.887783       0.000047
     C       1.149149      0.392873      -0.000195
     C      -0.286555      0.836909      -0.000243
     C      -1.302947     -0.279254       0.000509
     O      -2.608087      0.338922       0.000809
     O      -3.554154     -0.547667      -0.000566
     O       2.808980     -1.279956       0.000127
     H       0.772529     -1.692773       0.000239
     C       2.167038      1.493856      -0.000459
     H      -0.464979      1.472336       0.872425
     H      -0.465223      1.471424      -0.873521
     H      -1.242267     -0.904675      -0.889847
     H      -1.241502     -0.903978       0.891323
     H       2.863827     -2.236095       0.000007
     H       3.180058      1.102198      -0.000860
     H       2.039886      2.130695       0.877666
     H       2.039237      2.130865      -0.878364
Rotational constants (GHz):    4.6297500    0.8525500    0.7297200
Vibrational harmonic frequencies (cm-1):
       61.1190                   98.7035                  106.0269            
      120.7515                  124.9046                  216.6812            
      263.0903                  301.9858                  333.7557            
      352.6867                  461.9462                  551.4865            
      637.3932                  777.7230                  851.1881            
      881.7542                 1005.5986                 1027.6191            
     1032.6477                 1105.6258                 1112.9235            
     1188.1821                 1201.6842                 1231.4127            
     1295.4491                 1297.7054                 1308.7258            
     1343.6335                 1393.4035                 1420.2363            
     1446.5771                 1489.3928                 1494.3233            
     1498.0086                 1512.2925                 1796.4653            
     3043.6363                 3052.7079                 3072.4169            
     3082.2130                 3100.2050                 3139.7630            
     3170.4924                 3194.7409                 3923.5816            
Zero-point correction (Hartree): 0.139248

HOCHCCH3CH2CH2OO.Egmpc
~~~~~~~~~~~~~~~~~~~~~~
E(UM062X/Aug-CC-pVTZ) (Hartree): -421.45079312 
Electronic state : 2-A
Cartesian coordinates (Angs):
     C      -1.828722      0.593462      -0.318153
     C      -0.749123      0.228923       0.366273
     C       0.356813      1.221157       0.592489
     C       1.588782      1.000573      -0.274274
     O       2.226603     -0.254941       0.045546
     O       1.867639     -1.208950      -0.758884
     O      -2.888998     -0.203964      -0.611804
     H      -1.967069      1.592998      -0.708991
     C      -0.625813     -1.165153       0.928019
     H       0.001192      2.230566       0.374814
     H       0.665992      1.211051       1.640907
     H       1.340216      0.972306      -1.333044
     H       2.348091      1.756234      -0.075769
     H      -2.717138     -1.099473      -0.304838
     H      -0.474526     -1.911017       0.144251
     H      -1.516950     -1.442277       1.497998
     H       0.226614     -1.241311       1.599681
Rotational constants (GHz):    3.5834100    1.2111900    1.0713800
Vibrational harmonic frequencies (cm-1):
       39.9458                   73.1485                  128.2640            
      167.4782                  175.8704                  263.8396            
      308.0215                  339.6564                  396.1107            
      471.1996                  520.2774                  540.9332            
      609.5298                  795.0616                  861.5924            
      923.9655                  937.1037                 1016.3156            
     1031.4899                 1050.5768                 1093.6730            
     1179.3530                 1227.8926                 1241.8213            
     1251.0525                 1320.3644                 1328.3232            
     1378.4174                 1391.6522                 1405.0569            
     1421.3944                 1470.4582                 1481.4939            
     1496.5170                 1502.0666                 1765.0900            
     3040.3305                 3053.9698                 3088.4239            
     3093.0150                 3102.2243                 3146.0031            
     3158.5547                 3212.6987                 3861.4501            
Zero-point correction (Hartree): 0.139792

HOCHCCH3CH2CH2OO.Elmmc
~~~~~~~~~~~~~~~~~~~~~~
E(UM062X/Aug-CC-pVTZ) (Hartree): -421.45242156 
Electronic state : 2-A
Cartesian coordinates (Angs):
     C       2.013050     -0.583300       0.048600
     C       0.822405     -0.037761       0.280218
     C      -0.330897     -0.920787       0.665404
     C      -1.401168     -1.046745      -0.407538
     O      -2.022990      0.228051      -0.691483
     O      -2.717012      0.653555       0.318701
     O       3.144830      0.064818      -0.333535
     H       2.192013     -1.644901       0.158839
     C       0.576416      1.443144       0.170143
     H       0.025312     -1.930256       0.878572
     H      -0.813437     -0.547858       1.572093
     H      -0.979016     -1.352464      -1.363281
     H      -2.195381     -1.728309      -0.105657
     H       2.954627      0.995628      -0.481461
     H       0.217636      1.728786      -0.820826
     H       1.471402      2.028463       0.390908
     H      -0.190622      1.752218       0.880397
Rotational constants (GHz):    4.6129000    1.0605600    0.9487100
Vibrational harmonic frequencies (cm-1):
       38.6505                   77.3705                  130.5209            
      169.8811                  176.6163                  264.7294            
      311.8036                  328.6012                  402.1490            
      459.2398                  517.9373                  551.3201            
      617.6214                  797.0893                  847.4594            
      928.4938                  943.3898                  996.1643            
     1036.3604                 1052.8646                 1106.3434            
     1176.3255                 1219.7146                 1234.3742            
     1269.0028                 1305.5852                 1318.0439            
     1378.3035                 1395.9793                 1409.7986            
     1426.5379                 1469.6655                 1485.0410            
     1489.3419                 1505.1048                 1769.2464            
     3047.6348                 3061.1003                 3088.9961            
     3104.5789                 3110.0293                 3124.2378            
     3153.5715                 3211.4230                 3868.8059            
Zero-point correction (Hartree): 0.139827

HOCHCCH3CH2CH2OO.Elmmt
~~~~~~~~~~~~~~~~~~~~~~
E(UM062X/Aug-CC-pVTZ) (Hartree): -421.45107126 
Electronic state : 2-A
Cartesian coordinates (Angs):
     C      -2.045545     -0.556310      -0.080610
     C      -0.840502     -0.020493      -0.231501
     C       0.320886     -0.905756      -0.581414
     C       1.398805     -0.977272       0.489546
     O       2.113025      0.274231       0.616461
     O       2.827360      0.521781      -0.437538
     O      -3.140708      0.192148       0.252576
     H      -2.218904     -1.618909      -0.211558
     C      -0.596830      1.451270      -0.071279
     H      -0.024704     -1.925997      -0.758613
     H       0.802291     -0.563348      -1.501394
     H       0.977864     -1.144065       1.479792
     H       2.140528     -1.740460       0.258152
     H      -3.929223     -0.350927       0.223254
     H      -0.062021      1.665449       0.855983
     H      -1.533593      2.002421      -0.061156
     H       0.029452      1.821923      -0.884911
Rotational constants (GHz):    4.9357000    1.0140300    0.9163200
Vibrational harmonic frequencies (cm-1):
       36.7960                   71.9341                  147.3537            
      166.4145                  200.7384                  220.6476            
      267.5188                  297.9678                  374.2763            
      433.4844                  506.7578                  553.2612            
      611.9254                  806.4659                  851.1981            
      888.6263                  946.0686                  989.6621            
     1041.5967                 1058.7229                 1110.1534            
     1180.1000                 1210.4322                 1229.0814            
     1272.1106                 1305.5993                 1308.5329            
     1380.5998                 1394.8994                 1397.4725            
     1430.8916                 1468.7159                 1487.8996            
     1493.0969                 1493.7255                 1791.2177            
     3056.7129                 3057.7261                 3087.8331            
     3106.6378                 3107.8842                 3152.1624            
     3161.8569                 3175.6031                 3920.5807            
Zero-point correction (Hartree): 0.139544

HOCHCCH3CH2CH2OO.Elmtc
~~~~~~~~~~~~~~~~~~~~~~
E(UM062X/Aug-CC-pVTZ) (Hartree): -421.45103902 
Electronic state : 2-A
Cartesian coordinates (Angs):
     C       2.057130     -0.569428      -0.201725
     C       0.932723     -0.082448       0.315439
     C      -0.172671     -1.032065       0.687609
     C      -1.412079     -0.918236      -0.180575
     O      -2.063491      0.337284       0.123070
     O      -3.099629      0.531724      -0.632015
     O       3.138556      0.138524      -0.620488
     H       2.215710     -1.631877      -0.333222
     C       0.710421      1.388304       0.540609
     H       0.181427     -2.060750       0.604398
     H      -0.471987     -0.880858       1.728956
     H      -1.171835     -0.910268      -1.243110
     H      -2.133812     -1.706963       0.029789
     H       2.960188      1.080858      -0.554230
     H       0.152950      1.849424      -0.276981
     H       1.646002      1.936518       0.665775
     H       0.124727      1.546901       1.445953
Rotational constants (GHz):    4.5600900    0.9613500    0.8826200
Vibrational harmonic frequencies (cm-1):
       33.2861                   60.1466                   98.9528            
      149.4043                  179.0129                  256.2755            
      302.3820                  334.3240                  390.1704            
      410.9641                  501.4042                  575.1685            
      600.9007                  797.4821                  840.6084            
      925.9919                  961.2699                 1025.1453            
     1044.0113                 1059.1274                 1093.6388            
     1180.0190                 1218.9880                 1237.1159            
     1276.0249                 1295.5166                 1318.5902            
     1380.5161                 1398.0782                 1412.0442            
     1428.2151                 1467.6952                 1485.1955            
     1498.0731                 1503.1657                 1769.5168            
     3049.7919                 3050.6693                 3082.3847            
     3107.0257                 3108.5436                 3125.5393            
     3142.4746                 3209.4681                 3871.6575            
Zero-point correction (Hartree): 0.139551

HOCHCCH3CH2CH2OO.Elmtt
~~~~~~~~~~~~~~~~~~~~~~
E(UM062X/Aug-CC-pVTZ) (Hartree): -421.44993064 
Electronic state : 2-A
Cartesian coordinates (Angs):
     C      -2.102942      0.538206      -0.143436
     C      -0.937721      0.060986       0.276054
     C       0.166425      1.019365       0.624421
     C       1.406567      0.886346      -0.241243
     O       2.135432     -0.287980       0.187571
     O       3.181418     -0.493893      -0.550088
     O      -3.144905     -0.277302      -0.488645
     H      -2.283931      1.603643      -0.234672
     C      -0.681508     -1.410118       0.417318
     H      -0.189171      2.046483       0.528509
     H       0.472598      0.885162       1.666565
     H       1.166525      0.752649      -1.295559
     H       2.081468      1.733116      -0.121316
     H      -3.916446      0.249339      -0.700408
     H       0.027256     -1.761330      -0.335032
     H      -1.602277     -1.977775       0.312444
     H      -0.236502     -1.626603       1.390083
Rotational constants (GHz):    4.9541800    0.9345000    0.8533500
Vibrational harmonic frequencies (cm-1):
       38.2223                   60.7487                  118.7998            
      167.5998                  208.7623                  239.9630            
      253.9018                  295.9806                  369.6034            
      380.9865                  471.5233                  579.6108            
      597.9815                  807.2849                  841.7321            
      891.1782                  958.9019                 1021.9535            
     1049.8199                 1064.5119                 1098.2331            
     1185.8944                 1209.9780                 1231.6886            
     1279.2776                 1296.1262                 1305.4640            
     1382.0083                 1397.4037                 1398.7941            
     1432.0567                 1465.6511                 1490.4287            
     1496.2937                 1500.0287                 1794.8727            
     3047.2310                 3058.8339                 3081.9629            
     3106.0061                 3109.1757                 3141.2796            
     3163.4507                 3177.9344                 3921.3390            
Zero-point correction (Hartree): 0.139402

HOCHCCH3CH2CH2OO.Elpmc
~~~~~~~~~~~~~~~~~~~~~~
E(CCSD(T)/Aug-CC-pVTZ) (Hartree): -420.84408640 
E(CCSD/Aug-CC-pVTZ) (Hartree): -420.77348661
[truncated: 119,171 more chars]
